# Supplementary material
Source: publisher figshare collection journal article supplement (https://gsajournals.figshare.com/articles/dataset/_/11815296)
Supplement: Supplementary file 1 [file 1]

## Sheet: Screen data
Table S2. Complete data set for all the mice comprising the 1,344 alleles screened.
Mouse Name	Genotype	Zygosity	Sex	Birth Date	Gene name	Assay Date	Pulmonary_Metastasis_Count	Age	Colony Prefix	Strain	Strain group	Cell Number Administered	Dosing Group	Necropsy Comment
CBLT1255.5c	WT	Wildtype	Female	2012-05-25		2012-08-13	127	11w 3d	CBLT	C57BL/6NTac	B6	5	A
CBLT1255.5d	WT	Wildtype	Female	2012-05-25		2012-08-13	228	11w 3d	CBLT	C57BL/6NTac	B6	5	A
CBLT1300.4c	WT	Wildtype	Female	2012-05-25		2012-08-13	30	11w 3d	CBLT	C57BL/6NTac	B6	5	A
CBLT1300.4d	WT	Wildtype	Female	2012-05-25		2012-08-13	123	11w 3d	CBLT	C57BL/6NTac	B6	5	A
PHOX49.8a	Cybb:Hom	Homozygous	Female	2012-06-01	Cybb	2012-08-13	78	10w 3d	PHOX	C57BL/6	B6	5	A
PHOX49.8b	Cybb:Hom	Homozygous	Female	2012-06-01	Cybb	2012-08-13	2	10w 3d	PHOX	C57BL/6	B6	5	A
PHOX55.2e	Cybb:Hom	Homozygous	Female	2012-03-28	Cybb	2012-08-13	37	19w 5d	PHOX	C57BL/6	B6	5	A
PHOX58.5e	Cybb:Hom	Homozygous	Female	2012-04-28	Cybb	2012-08-13	7	15w 2d	PHOX	C57BL/6	B6	5	A
PHOX58.5f	Cybb:Hom	Homozygous	Female	2012-04-28	Cybb	2012-08-13	32	15w 2d	PHOX	C57BL/6	B6	5	A
CBLT1245.2a	WT	Wildtype	Male	2012-03-29		2012-08-13	105	19w 4d	CBLT	C57BL/6NTac	B6	5	B
CBLT1245.2c	WT	Wildtype	Male	2012-03-29		2012-08-13	80	19w 4d	CBLT	C57BL/6NTac	B6	5	B
CBLT1245.2e	WT	Wildtype	Male	2012-03-29		2012-08-13	71	19w 4d	CBLT	C57BL/6NTac	B6	5	B
PHOX58.5c	Cybb:Hom	Homozygous	Male	2012-04-28	Cybb	2012-08-13	40	15w 2d	PHOX	C57BL/6	B6	5	B
PHOX58.5d	Cybb:Hom	Homozygous	Male	2012-04-28	Cybb	2012-08-13	58	15w 2d	PHOX	C57BL/6	B6	5	B
MDWN23.2b	WT	Wildtype	Female	2012-06-26		2012-08-27	305	8w 6d	MDWN	C57BL/6N;C57BL/6NTac	B6	5	A
MDWN23.2h	WT	Wildtype	Female	2012-06-26		2012-08-27	145	8w 6d	MDWN	C57BL/6N;C57BL/6NTac	B6	5	A
MDWN28.1d	WT	Wildtype	Female	2012-06-27		2012-08-27	46	8w 5d	MDWN	C57BL/6N;C57BL/6NTac	B6	5	A
MEDH22.1f	WT	Wildtype	Female	2012-06-24		2012-08-27	270	9w 1d	MEDH	C57BL/6N;C57BL/6NTac	B6	5	A
MEDH22.1g	WT	Wildtype	Female	2012-06-24		2012-08-27	285	9w 1d	MEDH	C57BL/6N;C57BL/6NTac	B6	5	A
CBLT1467.3e	WT	Wildtype	Female	2012-06-25		2012-08-27	245	9w	CBLT	C57BL/6NTac	B6	5	A
CBLT1467.3f	WT	Wildtype	Female	2012-06-25		2012-08-27	320	9w	CBLT	C57BL/6NTac	B6	5	A
CBLT1467.3g	WT	Wildtype	Female	2012-06-25		2012-08-27	100	9w	CBLT	C57BL/6NTac	B6	5	A
CBLT1467.3h	WT	Wildtype	Female	2012-06-25		2012-08-27	315	9w	CBLT	C57BL/6NTac	B6	5	A
CBLT1467.3i	WT	Wildtype	Female	2012-06-25		2012-08-27	300	9w	CBLT	C57BL/6NTac	B6	5	A
CBLT1467.3j	WT	Wildtype	Female	2012-06-25		2012-08-27	125	9w	CBLT	C57BL/6NTac	B6	5	A
MDTZ36.3g	Fbxo47:Hom	Homozygous	Female	2012-06-21	Fbxo47	2012-08-27	210	9w 4d	MDTZ	C57BL/6N;C57BL/6NTac	B6	5	A
MDTZ39.3h	Fbxo47:Hom	Homozygous	Female	2012-07-03	Fbxo47	2012-08-27	165	7w 6d	MDTZ	C57BL/6N;C57BL/6NTac	B6	5	A
MDTZ39.3i	Fbxo47:Hom	Homozygous	Female	2012-07-03	Fbxo47	2012-08-27	240	7w 6d	MDTZ	C57BL/6N;C57BL/6NTac	B6	5	A
MDTZ42.3k	Fbxo47:Hom	Homozygous	Female	2012-07-03	Fbxo47	2012-08-27	230	7w 6d	MDTZ	C57BL/6N;C57BL/6NTac	B6	5	A
CBLT1671.2f	WT	Wildtype	Female	2012-06-22		2012-08-31	92	10w	CBLT	C57BL/6NTac	B6	5	A
CBLT1671.2g	WT	Wildtype	Female	2012-06-22		2012-08-31	150	10w	CBLT	C57BL/6NTac	B6	5	A
CBLT1671.2h	WT	Wildtype	Female	2012-06-22		2012-08-31	180	10w	CBLT	C57BL/6NTac	B6	5	A
CBLT1737.1e	WT	Wildtype	Female	2012-06-20		2012-08-31	190	10w 2d	CBLT	C57BL/6NTac	B6	5	A
CBLT1737.1f	WT	Wildtype	Female	2012-06-20		2012-08-31	205	10w 2d	CBLT	C57BL/6NTac	B6	5	A
CBLT1737.1g	WT	Wildtype	Female	2012-06-20		2012-08-31	145	10w 2d	CBLT	C57BL/6NTac	B6	5	A
SCAN76.1d	Irf1:Hom	Homozygous	Female	2012-06-16	Irf1	2012-08-31	350	10w 6d	SCAN	C57BL/6Brd-Tyr<c-Brd>;C57BL/6Dnk;C57BL/6N	B6	5	A
SCAN76.1e	Irf1:Hom	Homozygous	Female	2012-06-16	Irf1	2012-08-31	415	10w 6d	SCAN	C57BL/6Brd-Tyr<c-Brd>;C57BL/6Dnk;C57BL/6N	B6	5	A
SCAN79.1g	Irf1:Hom	Homozygous	Female	2012-06-20	Irf1	2012-08-31	385	10w 2d	SCAN	C57BL/6Brd-Tyr<c-Brd>;C57BL/6Dnk;C57BL/6N	B6	5	A
MELB21.1f	WT	Wildtype	Female	2012-06-23		2012-09-03	110	10w 2d	MELB	C57BL/6N;C57BL/6NTac	B6	5	A
MELB21.1h	WT	Wildtype	Female	2012-06-23		2012-09-03	200	10w 2d	MELB	C57BL/6N;C57BL/6NTac	B6	5	A
MEFU18.2b	WT	Wildtype	Female	2012-06-22		2012-09-03	45	10w 3d	MEFU	C57BL/6N;C57BL/6NTac	B6	5	A
MEFU22.1f	WT	Wildtype	Female	2012-06-17		2012-09-03	325	11w 1d	MEFU	C57BL/6N;C57BL/6NTac	B6	5	A
MEMR21.1c	WT	Wildtype	Female	2012-06-23		2012-09-03	196	10w 2d	MEMR	C57BL/6N;C57BL/6NTac	B6	5	A
MEMR21.1d	WT	Wildtype	Female	2012-06-23		2012-09-03	290	10w 2d	MEMR	C57BL/6N;C57BL/6NTac	B6	5	A
CBLT1533.3h	WT	Wildtype	Female	2012-06-13		2012-09-03	147	11w 5d	CBLT	C57BL/6NTac	B6	5	A
CBLT1533.3i	WT	Wildtype	Female	2012-06-13		2012-09-03	69	11w 5d	CBLT	C57BL/6NTac	B6	5	A
CBLT1533.3j	WT	Wildtype	Female	2012-06-13		2012-09-03	228	11w 5d	CBLT	C57BL/6NTac	B6	5	A
CBLT1748.2g	WT	Wildtype	Female	2012-06-14		2012-09-03	99	11w 4d	CBLT	C57BL/6NTac	B6	5	A
CBLT1748.2h	WT	Wildtype	Female	2012-06-14		2012-09-03	176	11w 4d	CBLT	C57BL/6NTac	B6	5	A
CBLT1974.1f	WT	Wildtype	Female	2012-07-06		2012-09-03	265	7w 3d	CBLT	C57BL/6NTac	B6	5	A
CBLT1974.1g	WT	Wildtype	Female	2012-07-06		2012-09-03	275	7w 3d	CBLT	C57BL/6NTac	B6	5	A
CBLT1974.1h	WT	Wildtype	Female	2012-07-06		2012-09-03	220	7w 3d	CBLT	C57BL/6NTac	B6	5	A
CBLT1974.1i	WT	Wildtype	Female	2012-07-06		2012-09-03	170	7w 3d	CBLT	C57BL/6NTac	B6	5	A
CBLT1977.1g	WT	Wildtype	Female	2012-07-05		2012-09-03	167	7w 4d	CBLT	C57BL/6NTac	B6	5	A
CBLT1977.1h	WT	Wildtype	Female	2012-07-05		2012-09-03	171	7w 4d	CBLT	C57BL/6NTac	B6	5	A
MEDY30.2c	Arsg:Hom	Homozygous	Female	2012-06-17	Arsg	2012-09-03	164	11w 1d	MEDY	C57BL/6N;C57BL/6NTac	B6	5	A
MEDY30.2d	Arsg:Hom	Homozygous	Female	2012-06-17	Arsg	2012-09-03	62	11w 1d	MEDY	C57BL/6N;C57BL/6NTac	B6	5	A
MEDY31.2b	Arsg:Hom	Homozygous	Female	2012-07-01	Arsg	2012-09-03	145	9w 1d	MEDY	C57BL/6N;C57BL/6NTac	B6	5	A
MEDY31.2c	Arsg:Hom	Homozygous	Female	2012-07-01	Arsg	2012-09-03	130	9w 1d	MEDY	C57BL/6N;C57BL/6NTac	B6	5	A
MEDY31.2d	Arsg:Hom	Homozygous	Female	2012-07-01	Arsg	2012-09-03	115	9w 1d	MEDY	C57BL/6N;C57BL/6NTac	B6	5	A
MEDY32.3c	Arsg:Hom	Homozygous	Female	2012-07-06	Arsg	2012-09-03	140	8w 3d	MEDY	C57BL/6N;C57BL/6NTac	B6	5	A
MEDY32.3d	Arsg:Hom	Homozygous	Female	2012-07-06	Arsg	2012-09-03	160	8w 3d	MEDY	C57BL/6N;C57BL/6NTac	B6	5	A
MEDY34.1b	Arsg:Hom	Homozygous	Female	2012-07-18	Arsg	2012-09-03	270	6w 5d	MEDY	C57BL/6N;C57BL/6NTac	B6	5	A
MDGG46.2a	Kdm4d:Hom	Homozygous	Female	2012-06-28	Kdm4d	2012-09-03	120	9w 4d	MDGG	C57BL/6N;C57BL/6NTac	B6	5	A
MDGG49.2a	Kdm4d:Hom	Homozygous	Female	2012-07-10	Kdm4d	2012-09-03	28	7w 6d	MDGG	C57BL/6N;C57BL/6NTac	B6	5	A
MDGG49.2b	Kdm4d:Hom	Homozygous	Female	2012-07-10	Kdm4d	2012-09-03	170	7w 6d	MDGG	C57BL/6N;C57BL/6NTac	B6	5	A
MDGG50.1i	Kdm4d:Hom	Homozygous	Female	2012-06-14	Kdm4d	2012-09-03	45	11w 4d	MDGG	C57BL/6N;C57BL/6NTac	B6	5	A
MDGG51.1c	Kdm4d:Hom	Homozygous	Female	2012-06-17	Kdm4d	2012-09-03	165	11w 1d	MDGG	C57BL/6N;C57BL/6NTac	B6	5	A
MELP20.1h	WT	Wildtype	Female	2012-07-03		2012-09-10	230	9w 6d	MELP	C57BL/6N;C57BL/6NTac	B6	5	A
MELP21.1b	WT	Wildtype	Female	2012-07-03		2012-09-10	145	9w 6d	MELP	C57BL/6N;C57BL/6NTac	B6	5	A
MEKG20.2h	WT	Wildtype	Female	2012-07-01		2012-09-10	164	10w 1d	MEKG	C57BL/6N;C57BL/6NTac	B6	5	A
MEPE13.2d	WT	Wildtype	Female	2012-07-04		2012-09-10	190	9w 5d	MEPE	C57BL/6N;C57BL/6NTac	B6	5	A
MEPE13.2e	WT	Wildtype	Female	2012-07-04		2012-09-10	190	9w 5d	MEPE	C57BL/6N;C57BL/6NTac	B6	5	A
CBLT1623.3c	WT	Wildtype	Female	2012-06-10		2012-09-10	120	13w 1d	CBLT	C57BL/6NTac	B6	5	A
CBLT1623.3d	WT	Wildtype	Female	2012-06-10		2012-09-10	135	13w 1d	CBLT	C57BL/6NTac	B6	5	A
CBLT1623.3e	WT	Wildtype	Female	2012-06-10		2012-09-10	125	13w 1d	CBLT	C57BL/6NTac	B6	5	A
CBLT1624.3f	WT	Wildtype	Female	2012-06-11		2012-09-10	85	13w	CBLT	C57BL/6NTac	B6	5	A
CBLT1624.3g	WT	Wildtype	Female	2012-06-11		2012-09-10	165	13w	CBLT	C57BL/6NTac	B6	5	A
CBLT1624.3h	WT	Wildtype	Female	2012-06-11		2012-09-10	90	13w	CBLT	C57BL/6NTac	B6	5	A
CBLT1964.1g	WT	Wildtype	Female	2012-07-06		2012-09-10	165	9w 3d	CBLT	C57BL/6NTac	B6	5	A
CBLT1964.1h	WT	Wildtype	Female	2012-07-06		2012-09-10	140	9w 3d	CBLT	C57BL/6NTac	B6	5	A
CBLT1971.1e	WT	Wildtype	Female	2012-07-06		2012-09-10	190	9w 3d	CBLT	C57BL/6NTac	B6	5	A
CBLT1971.1f	WT	Wildtype	Female	2012-07-06		2012-09-10	295	9w 3d	CBLT	C57BL/6NTac	B6	5	A
CBLT1971.1g	WT	Wildtype	Female	2012-07-06		2012-09-10	150	9w 3d	CBLT	C57BL/6NTac	B6	5	A
CBLT1971.1h	WT	Wildtype	Female	2012-07-06		2012-09-10	115	9w 3d	CBLT	C57BL/6NTac	B6	5	A
GDBB16.2a	Il22ra1:Hom	Homozygous	Female	2012-05-23	Il22ra1	2012-09-10	40	15w 5d	GDBB	C57BL/6N;C57BL/6NTac	B6	5	A
GDBB16.3c	Il22ra1:Hom	Homozygous	Female	2012-06-16	Il22ra1	2012-09-10	180	12w 2d	GDBB	C57BL/6N;C57BL/6NTac	B6	5	A
GDBB17.2e	Il22ra1:Hom	Homozygous	Female	2012-05-23	Il22ra1	2012-09-10	75	15w 5d	GDBB	C57BL/6N;C57BL/6NTac	B6	5	A
GDBB17.2f	Il22ra1:Hom	Homozygous	Female	2012-05-23	Il22ra1	2012-09-10	130	15w 5d	GDBB	C57BL/6N;C57BL/6NTac	B6	5	A
GDBB17.2g	Il22ra1:Hom	Homozygous	Female	2012-05-23	Il22ra1	2012-09-10	170	15w 5d	GDBB	C57BL/6N;C57BL/6NTac	B6	5	A
CBLT1533.3k	WT	Wildtype	Female	2012-06-13		2012-09-15	16	13w 3d	CBLT	C57BL/6NTac	B6	5	A
CBLT1544.3e	WT	Wildtype	Female	2012-06-10		2012-09-15	108	13w 6d	CBLT	C57BL/6NTac	B6	5	A
CBLT1544.3f	WT	Wildtype	Female	2012-06-10		2012-09-15	245	13w 6d	CBLT	C57BL/6NTac	B6	5	A
CBLT1544.3g	WT	Wildtype	Female	2012-06-10		2012-09-15	150	13w 6d	CBLT	C57BL/6NTac	B6	5	A
CBLT1544.3h	WT	Wildtype	Female	2012-06-10		2012-09-15	175	13w 6d	CBLT	C57BL/6NTac	B6	5	A
CBLT1544.3i	WT	Wildtype	Female	2012-06-10		2012-09-15	270	13w 6d	CBLT	C57BL/6NTac	B6	5	A
CBLT1544.3j	WT	Wildtype	Female	2012-06-10		2012-09-15	156	13w 6d	CBLT	C57BL/6NTac	B6	5	A
CBLT1544.3k	WT	Wildtype	Female	2012-06-10		2012-09-15	150	13w 6d	CBLT	C57BL/6NTac	B6	5	A
CBLT1611.2c	WT	Wildtype	Female	2012-06-15		2012-09-15	170	13w 1d	CBLT	C57BL/6NTac	B6	5	A
CBLT1663.2h	WT	Wildtype	Female	2012-06-14		2012-09-15	125	13w 2d	CBLT	C57BL/6NTac	B6	5	A
CBLT1663.2i	WT	Wildtype	Female	2012-06-14		2012-09-15	190	13w 2d	CBLT	C57BL/6NTac	B6	5	A
CBLT1663.2j	WT	Wildtype	Female	2012-06-14		2012-09-15	190	13w 2d	CBLT	C57BL/6NTac	B6	5	A
PHOX60.1f	Cybb:Hom	Homozygous	Female	2012-06-17	Cybb	2012-09-15	100	12w 6d	PHOX	C57BL/6	B6	5	A
PHOX60.1g	Cybb:Hom	Homozygous	Female	2012-06-17	Cybb	2012-09-15	120	12w 6d	PHOX	C57BL/6	B6	5	A
PHOX60.1h	Cybb:Hom	Homozygous	Female	2012-06-17	Cybb	2012-09-15	28	12w 6d	PHOX	C57BL/6	B6	5	A
PHOX61.1c	Cybb:Hom	Homozygous	Female	2012-07-11	Cybb	2012-09-15	50	9w 3d	PHOX	C57BL/6	B6	5	A
PHOX61.1d	Cybb:Hom	Homozygous	Female	2012-07-11	Cybb	2012-09-15	43	9w 3d	PHOX	C57BL/6	B6	5	A
PHOX62.1f	Cybb:Hom	Homozygous	Female	2012-06-21	Cybb	2012-09-15	135	12w 2d	PHOX	C57BL/6	B6	5	A
PHOX62.1g	Cybb:Hom	Homozygous	Female	2012-06-21	Cybb	2012-09-15	55	12w 2d	PHOX	C57BL/6	B6	5	A
IGH30.2f	Igh-6:Hom	Homozygous	Female	2012-06-01	Igh-6	2012-09-15	330	15w 1d	IGH	C57BL/6	B6	5	A
IGH30.2g	Igh-6:Hom	Homozygous	Female	2012-06-01	Igh-6	2012-09-15	339	15w 1d	IGH	C57BL/6	B6	5	A
IGH30.2h	Igh-6:Hom	Homozygous	Female	2012-06-01	Igh-6	2012-09-15	336	15w 1d	IGH	C57BL/6	B6	5	A
IGH30.2i	Igh-6:Hom	Homozygous	Female	2012-06-01	Igh-6	2012-09-15	270	15w 1d	IGH	C57BL/6	B6	5	A
IGH31.4d	Igh-6:Hom	Homozygous	Female	2012-06-15	Igh-6	2012-09-15	260	13w 1d	IGH	C57BL/6	B6	5	A
IGH31.4e	Igh-6:Hom	Homozygous	Female	2012-06-15	Igh-6	2012-09-15	110	13w 1d	IGH	C57BL/6	B6	5	A
IGH31.4f	Igh-6:Hom	Homozygous	Female	2012-06-15	Igh-6	2012-09-15	320	13w 1d	IGH	C57BL/6	B6	5	A
IGH31.4g	Igh-6:Hom	Homozygous	Female	2012-06-15	Igh-6	2012-09-15	220	13w 1d	IGH	C57BL/6	B6	5	A
IGH32.3b	Igh-6:Hom	Homozygous	Female	2012-06-11	Igh-6	2012-09-15	390	13w 5d	IGH	C57BL/6	B6	5	A
CBLT1196.3d	WT	Wildtype	Female	2012-04-13		2012-09-17	104	22w 3d	CBLT	C57BL/6NTac	B6	5	A
CBLT1196.3f	WT	Wildtype	Female	2012-04-13		2012-09-17	290	22w 3d	CBLT	C57BL/6NTac	B6	5	A
CBLT1364.2e	WT	Wildtype	Female	2012-04-12		2012-09-17	125	22w 4d	CBLT	C57BL/6NTac	B6	5	A
CBLT1827.1h	WT	Wildtype	Female	2012-06-20		2012-09-17	104	12w 5d	CBLT	C57BL/6NTac	B6	5	A
CBLT1827.1i	WT	Wildtype	Female	2012-06-20		2012-09-17	62	12w 5d	CBLT	C57BL/6NTac	B6	5	A
CBLT1875.1d	WT	Wildtype	Female	2012-06-17		2012-09-17	243	13w 1d	CBLT	C57BL/6NTac	B6	5	A
CBLT1875.1f	WT	Wildtype	Female	2012-06-17		2012-09-17	156	13w 1d	CBLT	C57BL/6NTac	B6	5	A
CBLT1875.1g	WT	Wildtype	Female	2012-06-17		2012-09-17	220	13w 1d	CBLT	C57BL/6NTac	B6	5	A
BCGD5.4c	BC017643:Hom	Homozygous	Female	2012-03-13	BC017643	2012-09-17	87	26w 6d	BCGD	C57BL/6N;C57BL/6NTac	B6	5	A
BCGD5.4d	BC017643:Hom	Homozygous	Female	2012-03-13	BC017643	2012-09-17	40	26w 6d	BCGD	C57BL/6N;C57BL/6NTac	B6	5	A
BCGD7.3c	BC017643:Hom	Homozygous	Female	2012-03-02	BC017643	2012-09-17	70	28w 3d	BCGD	C57BL/6N;C57BL/6NTac	B6	5	A
BCGD7.3d	BC017643:Hom	Homozygous	Female	2012-03-02	BC017643	2012-09-17	50	28w 3d	BCGD	C57BL/6N;C57BL/6NTac	B6	5	A
BCGD7.3e	BC017643:Hom	Homozygous	Female	2012-03-02	BC017643	2012-09-17	45	28w 3d	BCGD	C57BL/6N;C57BL/6NTac	B6	5	A
BCGD7.3f	BC017643:Hom	Homozygous	Female	2012-03-02	BC017643	2012-09-17		28w 3d	BCGD	C57BL/6N;C57BL/6NTac	B6	5	A
CBLT1452.1a	WT	Wildtype	Male	2012-03-29		2012-09-17	112	24w 4d	CBLT	C57BL/6NTac	B6	5	B
CBLT1452.1b	WT	Wildtype	Male	2012-03-29		2012-09-17	52	24w 4d	CBLT	C57BL/6NTac	B6	5	B
CBLT1452.1d	WT	Wildtype	Male	2012-03-29		2012-09-17	85	24w 4d	CBLT	C57BL/6NTac	B6	5	B
CBLT1453.1c	WT	Wildtype	Male	2012-03-29		2012-09-17	124	24w 4d	CBLT	C57BL/6NTac	B6	5	B
CBLT1453.1d	WT	Wildtype	Male	2012-03-29		2012-09-17	126	24w 4d	CBLT	C57BL/6NTac	B6	5	B
BCGD5.4a	BC017643:Hom	Homozygous	Male	2012-03-13	BC017643	2012-09-17	15	26w 6d	BCGD	C57BL/6N;C57BL/6NTac	B6	5	B
BCGD5.4b	BC017643:Hom	Homozygous	Male	2012-03-13	BC017643	2012-09-17	61	26w 6d	BCGD	C57BL/6N;C57BL/6NTac	B6	5	B
MEDS18.2f	WT	Wildtype	Female	2012-07-19		2012-09-21	120	9w 1d	MEDS	C57BL/6N;C57BL/6NTac	B6	5	A
MEDS18.2h	WT	Wildtype	Female	2012-07-19		2012-09-21	130	9w 1d	MEDS	C57BL/6N;C57BL/6NTac	B6	5	A
MDWN23.3c	WT	Wildtype	Female	2012-07-21		2012-09-21	240	8w 6d	MDWN	C57BL/6N;C57BL/6NTac	B6	5	A
MDWN23.3d	WT	Wildtype	Female	2012-07-21		2012-09-21	200	8w 6d	MDWN	C57BL/6N;C57BL/6NTac	B6	5	A
MDVP35.2c	WT	Wildtype	Female	2012-07-20		2012-09-21	90	9w	MDVP	C57BL/6N;C57BL/6NTac	B6	5	A
MDVP35.2d	WT	Wildtype	Female	2012-07-20		2012-09-21	225	9w	MDVP	C57BL/6N;C57BL/6NTac	B6	5	A
CBLT1736.4h	WT	Wildtype	Female	2012-07-20		2012-09-21	260	9w	CBLT	C57BL/6NTac	B6	5	A
CBLT1848.1d	WT	Wildtype	Female	2012-07-13		2012-09-21	235	10w	CBLT	C57BL/6NTac	B6	5	A
CBLT1848.1e	WT	Wildtype	Female	2012-07-13		2012-09-21	130	10w	CBLT	C57BL/6NTac	B6	5	A
CBLT1848.1f	WT	Wildtype	Female	2012-07-13		2012-09-21	240	10w	CBLT	C57BL/6NTac	B6	5	A
CBLT1848.1g	WT	Wildtype	Female	2012-07-13		2012-09-21	220	10w	CBLT	C57BL/6NTac	B6	5	A
MDRQ27.3e	Hacl1:Hom	Homozygous	Female	2012-07-14	Hacl1	2012-09-21	78	9w 6d	MDRQ	C57BL/6N;C57BL/6NTac	B6	5	A
MDRQ36.2c	Hacl1:Hom	Homozygous	Female	2012-07-23	Hacl1	2012-09-21	195	8w 4d	MDRQ	C57BL/6N;C57BL/6NTac	B6	5	A
CBLT1716.4e	WT	Wildtype	Female	2012-07-30		2012-09-21	100	7w 4d	CBLT	C57BL/6NTac	B6	5	B
CBLT1716.4f	WT	Wildtype	Female	2012-07-30		2012-09-21	175	7w 4d	CBLT	C57BL/6NTac	B6	5	B
CBLT1716.4g	WT	Wildtype	Female	2012-07-30		2012-09-21	70	7w 4d	CBLT	C57BL/6NTac	B6	5	B
CBLT1990.1f	WT	Wildtype	Female	2012-07-20		2012-09-21	137	9w	CBLT	C57BL/6NTac	B6	5	B
CBLT1990.1g	WT	Wildtype	Female	2012-07-20		2012-09-21	90	9w	CBLT	C57BL/6NTac	B6	5	B
CBLT1990.1h	WT	Wildtype	Female	2012-07-20		2012-09-21	220	9w	CBLT	C57BL/6NTac	B6	5	B
CBLT1990.1i	WT	Wildtype	Female	2012-07-20		2012-09-21	155	9w	CBLT	C57BL/6NTac	B6	5	B
CBLT2032.1g	WT	Wildtype	Female	2012-07-18		2012-09-21	160	9w 2d	CBLT	C57BL/6NTac	B6	5	B
CBLT2032.1h	WT	Wildtype	Female	2012-07-18		2012-09-21	240	9w 2d	CBLT	C57BL/6NTac	B6	5	B
CBLT2126.1b	WT	Wildtype	Female	2012-08-01		2012-09-21	165	7w 2d	CBLT	C57BL/6NTac	B6	5	B
CBLT2126.1c	WT	Wildtype	Female	2012-08-01		2012-09-21	177	7w 2d	CBLT	C57BL/6NTac	B6	5	B
CBLT2126.1d	WT	Wildtype	Female	2012-08-01		2012-09-21	144	7w 2d	CBLT	C57BL/6NTac	B6	5	B
MDCM44.1c	Gpc5:Hom	Homozygous	Female	2012-07-22	Gpc5	2012-09-21	53	8w 5d	MDCM	C57BL/6N;C57BL/6NTac	B6	5	B
MDCM48.1g	Gpc5:Hom	Homozygous	Female	2012-07-18	Gpc5	2012-09-21	139	9w 2d	MDCM	C57BL/6N;C57BL/6NTac	B6	5	B
MDCM48.1h	Gpc5:Hom	Homozygous	Female	2012-07-18	Gpc5	2012-09-21	93	9w 2d	MDCM	C57BL/6N;C57BL/6NTac	B6	5	B
MDCM48.1i	Gpc5:Hom	Homozygous	Female	2012-07-18	Gpc5	2012-09-21	172	9w 2d	MDCM	C57BL/6N;C57BL/6NTac	B6	5	B
MDCM50.1e	Gpc5:Hom	Homozygous	Female	2012-07-20	Gpc5	2012-09-21	73	9w	MDCM	C57BL/6N;C57BL/6NTac	B6	5	B
MDCM50.1f	Gpc5:Hom	Homozygous	Female	2012-07-20	Gpc5	2012-09-21	100	9w	MDCM	C57BL/6N;C57BL/6NTac	B6	5	B
MDCM50.1g	Gpc5:Hom	Homozygous	Female	2012-07-20	Gpc5	2012-09-21	130	9w	MDCM	C57BL/6N;C57BL/6NTac	B6	5	B
MDCM51.1g	Gpc5:Hom	Homozygous	Female	2012-07-20	Gpc5	2012-09-21	140	9w	MDCM	C57BL/6N;C57BL/6NTac	B6	5	B
MCQP76.1e	WT	Wildtype	Female	2012-07-29		2012-10-01	190	9w 1d	MCQP	C57BL/6N;C57BL/6NTac	B6	5	A
MCQP77.1c	WT	Wildtype	Female	2012-07-29		2012-10-01	160	9w 1d	MCQP	C57BL/6N;C57BL/6NTac	B6	5	A
MCQP77.1e	WT	Wildtype	Female	2012-07-29		2012-10-01	170	9w 1d	MCQP	C57BL/6N;C57BL/6NTac	B6	5	A
MDAL62.2e	WT	Wildtype	Female	2012-07-30		2012-10-01		9w	MDAL	C57BL/6N;C57BL/6NTac	B6	5	A	Excluded (count <30 so presumed failed dosing)
MDAL62.2g	WT	Wildtype	Female	2012-07-30		2012-10-01	180	9w	MDAL	C57BL/6N;C57BL/6NTac	B6	5	A
MDAL62.2i	WT	Wildtype	Female	2012-07-30		2012-10-01		9w	MDAL	C57BL/6N;C57BL/6NTac	B6	5	A	Excluded (count <30 so presumed failed dosing)
CBLT1773.2k	WT	Wildtype	Female	2012-07-01		2012-10-01	110	13w 1d	CBLT	C57BL/6NTac	B6	5	A
CBLT1773.2l	WT	Wildtype	Female	2012-07-01		2012-10-01	155	13w 1d	CBLT	C57BL/6NTac	B6	5	A
CBLT1809.2e	WT	Wildtype	Female	2012-07-06		2012-10-01	95	12w 3d	CBLT	C57BL/6NTac	B6	5	A
CBLT1809.2f	WT	Wildtype	Female	2012-07-06		2012-10-01	95	12w 3d	CBLT	C57BL/6NTac	B6	5	A
CBLT1809.2g	WT	Wildtype	Female	2012-07-06		2012-10-01	180	12w 3d	CBLT	C57BL/6NTac	B6	5	A
CBLT1809.2h	WT	Wildtype	Female	2012-07-06		2012-10-01		12w 3d	CBLT	C57BL/6NTac	B6	5	A	Excluded (count <30 so presumed failed dosing)
MDCL95.1a	Sirt3:Hom	Homozygous	Female	2012-07-31	Sirt3	2012-10-01	116	8w 6d	MDCL	C57BL/6N;C57BL/6NTac	B6	5	A
MDCL96.1d	Sirt3:Hom	Homozygous	Female	2012-08-03	Sirt3	2012-10-01	150	8w 3d	MDCL	C57BL/6N;C57BL/6NTac	B6	5	A
MDCL96.1e	Sirt3:Hom	Homozygous	Female	2012-08-03	Sirt3	2012-10-01	177	8w 3d	MDCL	C57BL/6N;C57BL/6NTac	B6	5	A
MDCL96.1f	Sirt3:Hom	Homozygous	Female	2012-08-03	Sirt3	2012-10-01	120	8w 3d	MDCL	C57BL/6N;C57BL/6NTac	B6	5	A
MDCL96.1g	Sirt3:Hom	Homozygous	Female	2012-08-03	Sirt3	2012-10-01	160	8w 3d	MDCL	C57BL/6N;C57BL/6NTac	B6	5	A
MDCL96.1h	Sirt3:Hom	Homozygous	Female	2012-08-03	Sirt3	2012-10-01	155	8w 3d	MDCL	C57BL/6N;C57BL/6NTac	B6	5	A
MDCL96.1i	Sirt3:Hom	Homozygous	Female	2012-08-03	Sirt3	2012-10-01	95	8w 3d	MDCL	C57BL/6N;C57BL/6NTac	B6	5	A
MDCL97.1c	Sirt3:Hom	Homozygous	Female	2012-07-31	Sirt3	2012-10-01	146	8w 6d	MDCL	C57BL/6N;C57BL/6NTac	B6	5	A
MEEC24.1d	Trim17:Hom	Homozygous	Female	2012-07-30	Trim17	2012-10-01	110	9w	MEEC	C57BL/6N;C57BL/6NTac	B6	5	A
MEEC24.1e	Trim17:Hom	Homozygous	Female	2012-07-30	Trim17	2012-10-01	170	9w	MEEC	C57BL/6N;C57BL/6NTac	B6	5	A
MEEC25.1b	Trim17:Hom	Homozygous	Female	2012-08-04	Trim17	2012-10-01	186	8w 2d	MEEC	C57BL/6N;C57BL/6NTac	B6	5	A
MEEC25.1c	Trim17:Hom	Homozygous	Female	2012-08-04	Trim17	2012-10-01	165	8w 2d	MEEC	C57BL/6N;C57BL/6NTac	B6	5	A
MEEC28.1d	Trim17:Hom	Homozygous	Female	2012-08-07	Trim17	2012-10-01	100	7w 6d	MEEC	C57BL/6N;C57BL/6NTac	B6	5	A
CBLT1708.2c	WT	Wildtype	Female	2012-07-07		2012-10-01	160	12w 2d	CBLT	C57BL/6NTac	B6	5	B
CBLT1708.2d	WT	Wildtype	Female	2012-07-07		2012-10-01	107	12w 2d	CBLT	C57BL/6NTac	B6	5	B
CBLT1708.2e	WT	Wildtype	Female	2012-07-07		2012-10-01	170	12w 2d	CBLT	C57BL/6NTac	B6	5	B
CBLT1708.2f	WT	Wildtype	Female	2012-07-07		2012-10-01	190	12w 2d	CBLT	C57BL/6NTac	B6	5	B
CBLT1708.2g	WT	Wildtype	Female	2012-07-07		2012-10-01	220	12w 2d	CBLT	C57BL/6NTac	B6	5	B
CBLT1708.2h	WT	Wildtype	Female	2012-07-07		2012-10-01	90	12w 2d	CBLT	C57BL/6NTac	B6	5	B
CBLT1943.1d	WT	Wildtype	Female	2012-07-19		2012-10-01	100	10w 4d	CBLT	C57BL/6NTac	B6	5	B
CBLT2060.1b	WT	Wildtype	Female	2012-07-21		2012-10-01	200	10w 2d	CBLT	C57BL/6NTac	B6	5	B
CBLT2060.1c	WT	Wildtype	Female	2012-07-21		2012-10-01	160	10w 2d	CBLT	C57BL/6NTac	B6	5	B
CBLT2060.1d	WT	Wildtype	Female	2012-07-21		2012-10-01	130	10w 2d	CBLT	C57BL/6NTac	B6	5	B
CBLT2060.1e	WT	Wildtype	Female	2012-07-21		2012-10-01	85	10w 2d	CBLT	C57BL/6NTac	B6	5	B
CBLT2060.1f	WT	Wildtype	Female	2012-07-21		2012-10-01	112	10w 2d	CBLT	C57BL/6NTac	B6	5	B
MEKG19.3h	Dennd1c:Hom	Homozygous	Female	2012-07-31	Dennd1c	2012-10-01	105	8w 6d	MEKG	C57BL/6N;C57BL/6NTac	B6	5	B
MEKG23.1f	Dennd1c:Hom	Homozygous	Female	2012-08-03	Dennd1c	2012-10-01	140	8w 3d	MEKG	C57BL/6N;C57BL/6NTac	B6	5	B
MEKG24.1e	Dennd1c:Hom	Homozygous	Female	2012-08-01	Dennd1c	2012-10-01	160	8w 5d	MEKG	C57BL/6N;C57BL/6NTac	B6	5	B
MEKG24.1f	Dennd1c:Hom	Homozygous	Female	2012-08-01	Dennd1c	2012-10-01	210	8w 5d	MEKG	C57BL/6N;C57BL/6NTac	B6	5	B
MEKG26.1c	Dennd1c:Hom	Homozygous	Female	2012-07-23	Dennd1c	2012-10-01	90	10w	MEKG	C57BL/6N;C57BL/6NTac	B6	5	B
MEKG29.1k	Dennd1c:Hom	Homozygous	Female	2012-08-05	Dennd1c	2012-10-01	180	8w 1d	MEKG	C57BL/6N;C57BL/6NTac	B6	5	B
MDRZ27.1d	WT	Wildtype	Female	2012-08-10		2012-10-08	187	8w 3d	MDRZ	C57BL/6N;C57BL/6NTac	B6	5	A
MDRZ27.1e	WT	Wildtype	Female	2012-08-10		2012-10-08	210	8w 3d	MDRZ	C57BL/6N;C57BL/6NTac	B6	5	A
MASQ88.1f	WT	Wildtype	Female	2012-08-09		2012-10-08	305	8w 4d	MASQ	C57BL/6N;C57BL/6NTac	B6	5	A
MASQ88.1g	WT	Wildtype	Female	2012-08-09		2012-10-08	84	8w 4d	MASQ	C57BL/6N;C57BL/6NTac	B6	5	A
MASQ88.1j	WT	Wildtype	Female	2012-08-09		2012-10-08	220	8w 4d	MASQ	C57BL/6N;C57BL/6NTac	B6	5	A
MAYY110.1g	WT	Wildtype	Female	2012-08-09		2012-10-08	205	8w 4d	MAYY	C57BL/6N;C57BL/6NTac	B6	5	A
CBLT1545.4g	WT	Wildtype	Female	2012-08-07		2012-10-08	350	8w 6d	CBLT	C57BL/6NTac	B6	5	A
CBLT1545.4h	WT	Wildtype	Female	2012-08-07		2012-10-08	320	8w 6d	CBLT	C57BL/6NTac	B6	5	A
CBLT1545.4i	WT	Wildtype	Female	2012-08-07		2012-10-08	173	8w 6d	CBLT	C57BL/6NTac	B6	5	A
CBLT1545.4j	WT	Wildtype	Female	2012-08-07		2012-10-08	150	8w 6d	CBLT	C57BL/6NTac	B6	5	A
CBLT1545.4k	WT	Wildtype	Female	2012-08-07		2012-10-08	351	8w 6d	CBLT	C57BL/6NTac	B6	5	A
CBLT1749.3l	WT	Wildtype	Female	2012-08-09		2012-10-08	410	8w 4d	CBLT	C57BL/6NTac	B6	5	A
MDRB24.2e	Fggy:Hom	Homozygous	Female	2012-08-09	Fggy	2012-10-08	240	8w 4d	MDRB	C57BL/6N;C57BL/6NTac	B6	5	A
MDRB24.2f	Fggy:Hom	Homozygous	Female	2012-08-09	Fggy	2012-10-08	180	8w 4d	MDRB	C57BL/6N;C57BL/6NTac	B6	5	A
MDRB24.2g	Fggy:Hom	Homozygous	Female	2012-08-09	Fggy	2012-10-08	210	8w 4d	MDRB	C57BL/6N;C57BL/6NTac	B6	5	A
MDRB24.2h	Fggy:Hom	Homozygous	Female	2012-08-09	Fggy	2012-10-08	157	8w 4d	MDRB	C57BL/6N;C57BL/6NTac	B6	5	A
MDRB24.2i	Fggy:Hom	Homozygous	Female	2012-08-09	Fggy	2012-10-08	200	8w 4d	MDRB	C57BL/6N;C57BL/6NTac	B6	5	A
MDRB24.2j	Fggy:Hom	Homozygous	Female	2012-08-09	Fggy	2012-10-08	110	8w 4d	MDRB	C57BL/6N;C57BL/6NTac	B6	5	A
MDRB24.2k	Fggy:Hom	Homozygous	Female	2012-08-09	Fggy	2012-10-08	150	8w 4d	MDRB	C57BL/6N;C57BL/6NTac	B6	5	A
MDRB24.2l	Fggy:Hom	Homozygous	Female	2012-08-09	Fggy	2012-10-08	250	8w 4d	MDRB	C57BL/6N;C57BL/6NTac	B6	5	A
SUPR17.1g	WT	Wildtype	Female	2012-07-31		2012-10-08	66	9w 6d	SUPR	C57BL/6J	B6	5	B
SUPR17.1i	WT	Wildtype	Female	2012-07-31		2012-10-08	117	9w 6d	SUPR	C57BL/6J	B6	5	B
SUPR17.1k	WT	Wildtype	Female	2012-07-31		2012-10-08	124	9w 6d	SUPR	C57BL/6J	B6	5	B
SUPR17.1l	WT	Wildtype	Female	2012-07-31		2012-10-08	165	9w 6d	SUPR	C57BL/6J	B6	5	B
CBLT1883.2i	WT	Wildtype	Female	2012-08-02		2012-10-08	280	9w 4d	CBLT	C57BL/6NTac	B6	5	B
CBLT1883.2j	WT	Wildtype	Female	2012-08-02		2012-10-08	210	9w 4d	CBLT	C57BL/6NTac	B6	5	B
CBLT2132.1g	WT	Wildtype	Female	2012-08-03		2012-10-08	110	9w 3d	CBLT	C57BL/6NTac	B6	5	B
CBLT2132.1h	WT	Wildtype	Female	2012-08-03		2012-10-08	250	9w 3d	CBLT	C57BL/6NTac	B6	5	B
CBLT2132.1i	WT	Wildtype	Female	2012-08-03		2012-10-08	175	9w 3d	CBLT	C57BL/6NTac	B6	5	B
CBLT2132.1j	WT	Wildtype	Female	2012-08-03		2012-10-08	170	9w 3d	CBLT	C57BL/6NTac	B6	5	B
SCAN78.2d	Irf1:Hom	Homozygous	Female	2012-08-07	Irf1	2012-10-08	335	8w 6d	SCAN	C57BL/6Brd-Tyr<c-Brd>;C57BL/6Dnk;C57BL/6N	B6	5	B
SCAN79.2e	Irf1:Hom	Homozygous	Female	2012-07-12	Irf1	2012-10-08	415	12w 4d	SCAN	C57BL/6Brd-Tyr<c-Brd>;C57BL/6Dnk;C57BL/6N	B6	5	B
SCAN79.2f	Irf1:Hom	Homozygous	Female	2012-07-12	Irf1	2012-10-08	404	12w 4d	SCAN	C57BL/6Brd-Tyr<c-Brd>;C57BL/6Dnk;C57BL/6N	B6	5	B
SCAN79.2g	Irf1:Hom	Homozygous	Female	2012-07-12	Irf1	2012-10-08	397	12w 4d	SCAN	C57BL/6Brd-Tyr<c-Brd>;C57BL/6Dnk;C57BL/6N	B6	5	B
SCAN79.2h	Irf1:Hom	Homozygous	Female	2012-07-12	Irf1	2012-10-08	305	12w 4d	SCAN	C57BL/6Brd-Tyr<c-Brd>;C57BL/6Dnk;C57BL/6N	B6	5	B
SUPR17.1d	WT	Wildtype	Male	2012-07-31		2012-10-08	32	9w 6d	SUPR	C57BL/6J	B6	5	C
SUPR17.1e	WT	Wildtype	Male	2012-07-31		2012-10-08	46	9w 6d	SUPR	C57BL/6J	B6	5	C
CBLT1827.2a	WT	Wildtype	Male	2012-07-27		2012-10-08	105	10w 3d	CBLT	C57BL/6NTac	B6	5	C
CBLT1827.2b	WT	Wildtype	Male	2012-07-27		2012-10-08	95	10w 3d	CBLT	C57BL/6NTac	B6	5	C
CBLT1827.2c	WT	Wildtype	Male	2012-07-27		2012-10-08	70	10w 3d	CBLT	C57BL/6NTac	B6	5	C
CBLT1827.2d	WT	Wildtype	Male	2012-07-27		2012-10-08	105	10w 3d	CBLT	C57BL/6NTac	B6	5	C
CBLT1827.2f	WT	Wildtype	Male	2012-07-27		2012-10-08	40	10w 3d	CBLT	C57BL/6NTac	B6	5	C
CBLT1827.2g	WT	Wildtype	Male	2012-07-27		2012-10-08	37	10w 3d	CBLT	C57BL/6NTac	B6	5	C
SCAN79.2a	Irf1:Hom	Homozygous	Male	2012-07-12	Irf1	2012-10-08	260	12w 4d	SCAN	C57BL/6Brd-Tyr<c-Brd>;C57BL/6Dnk;C57BL/6N	B6	5	C
SCAN79.2b	Irf1:Hom	Homozygous	Male	2012-07-12	Irf1	2012-10-08	210	12w 4d	SCAN	C57BL/6Brd-Tyr<c-Brd>;C57BL/6Dnk;C57BL/6N	B6	5	C
SCAN79.2c	Irf1:Hom	Homozygous	Male	2012-07-12	Irf1	2012-10-08	226	12w 4d	SCAN	C57BL/6Brd-Tyr<c-Brd>;C57BL/6Dnk;C57BL/6N	B6	5	C
SCAN79.2d	Irf1:Hom	Homozygous	Male	2012-07-12	Irf1	2012-10-08	170	12w 4d	SCAN	C57BL/6Brd-Tyr<c-Brd>;C57BL/6Dnk;C57BL/6N	B6	5	C
CBLT2137.1a	WT	Wildtype	Male	2012-08-06		2012-10-15	106	10w	CBLT	C57BL/6NTac	B6	5	A
CBLT2137.1b	WT	Wildtype	Male	2012-08-06		2012-10-15	208	10w	CBLT	C57BL/6NTac	B6	5	A
CBLT2137.1c	WT	Wildtype	Male	2012-08-06		2012-10-15	210	10w	CBLT	C57BL/6NTac	B6	5	A
CBLT2137.1d	WT	Wildtype	Male	2012-08-06		2012-10-15	215	10w	CBLT	C57BL/6NTac	B6	5	A
CBLT2137.1e	WT	Wildtype	Male	2012-08-06		2012-10-15	130	10w	CBLT	C57BL/6NTac	B6	5	A
CBLT2137.1f	WT	Wildtype	Male	2012-08-06		2012-10-15	125	10w	CBLT	C57BL/6NTac	B6	5	A
CRLF4.1a	Crlf3:Hom	Homozygous	Male	2012-08-17	Crlf3	2012-10-15	140	8w 3d	CRLF	C57BL/6Brd-Tyr<c-Brd>;C57BL/6Dnk;C57BL/6N;C57BL/6NTac	B6	5	A
CRLF4.1b	Crlf3:Hom	Homozygous	Male	2012-08-17	Crlf3	2012-10-15	120	8w 3d	CRLF	C57BL/6Brd-Tyr<c-Brd>;C57BL/6Dnk;C57BL/6N;C57BL/6NTac	B6	5	A
CRLF4.1c	Crlf3:Hom	Homozygous	Male	2012-08-17	Crlf3	2012-10-15	125	8w 3d	CRLF	C57BL/6Brd-Tyr<c-Brd>;C57BL/6Dnk;C57BL/6N;C57BL/6NTac	B6	5	A
CRLF5.1b	Crlf3:Hom	Homozygous	Male	2012-08-18	Crlf3	2012-10-15	63	8w 2d	CRLF	C57BL/6Brd-Tyr<c-Brd>;C57BL/6Dnk;C57BL/6N;C57BL/6NTac	B6	5	A
CRLF5.1c	Crlf3:Hom	Homozygous	Male	2012-08-18	Crlf3	2012-10-15	147	8w 2d	CRLF	C57BL/6Brd-Tyr<c-Brd>;C57BL/6Dnk;C57BL/6N;C57BL/6NTac	B6	5	A
CRLF5.1f	Crlf3:Hom	Homozygous	Male	2012-08-18	Crlf3	2012-10-15	140	8w 2d	CRLF	C57BL/6Brd-Tyr<c-Brd>;C57BL/6Dnk;C57BL/6N;C57BL/6NTac	B6	5	A
MEBW27.4a	Oxr1:Het	Heterozygous	Male	2012-08-02	Oxr1	2012-10-15		10w 4d	MEBW	C57BL/6N;C57BL/6NTac	B6	5	A	Excluded (as difficulty dosing)
MEBW27.4b	Oxr1:Het	Heterozygous	Male	2012-08-02	Oxr1	2012-10-15	172	10w 4d	MEBW	C57BL/6N;C57BL/6NTac	B6	5	A
MEBW38.1a	Oxr1:Het	Heterozygous	Male	2012-08-15	Oxr1	2012-10-15	150	8w 5d	MEBW	C57BL/6N;C57BL/6NTac	B6	5	A
MEBW38.1b	Oxr1:Het	Heterozygous	Male	2012-08-15	Oxr1	2012-10-15	260	8w 5d	MEBW	C57BL/6N;C57BL/6NTac	B6	5	A
MEBW38.1d	Oxr1:Het	Heterozygous	Male	2012-08-15	Oxr1	2012-10-15	140	8w 5d	MEBW	C57BL/6N;C57BL/6NTac	B6	5	A
MEBW39.1d	Oxr1:Het	Heterozygous	Male	2012-08-17	Oxr1	2012-10-15	200	8w 3d	MEBW	C57BL/6N;C57BL/6NTac	B6	5	A
MEAD13.2f	WT	Wildtype	Female	2012-08-17		2012-10-15	240	8w 3d	MEAD	C57BL/6N;C57BL/6NTac	B6	5	B
MEAD13.2h	WT	Wildtype	Female	2012-08-17		2012-10-15	212	8w 3d	MEAD	C57BL/6N;C57BL/6NTac	B6	5	B
CRLF3.1d	WT	Wildtype	Female	2012-08-18		2012-10-15	245	8w 2d	CRLF	C57BL/6Brd-Tyr<c-Brd>;C57BL/6Dnk;C57BL/6N;C57BL/6NTac	B6	5	B
CRLF3.1g	WT	Wildtype	Female	2012-08-18		2012-10-15	120	8w 2d	CRLF	C57BL/6Brd-Tyr<c-Brd>;C57BL/6Dnk;C57BL/6N;C57BL/6NTac	B6	5	B
MEWE14.2d	WT	Wildtype	Female	2012-08-12		2012-10-15	250	9w 1d	MEWE	C57BL/6N;C57BL/6NTac	B6	5	B
MEWE14.2e	WT	Wildtype	Female	2012-08-12		2012-10-15	190	9w 1d	MEWE	C57BL/6N;C57BL/6NTac	B6	5	B
MEWE14.2g	WT	Wildtype	Female	2012-08-12		2012-10-15	170	9w 1d	MEWE	C57BL/6N;C57BL/6NTac	B6	5	B
CRLF4.1f	Crlf3:Hom	Homozygous	Female	2012-08-17	Crlf3	2012-10-15	200	8w 3d	CRLF	C57BL/6Brd-Tyr<c-Brd>;C57BL/6Dnk;C57BL/6N;C57BL/6NTac	B6	5	B
CRLF5.1j	Crlf3:Hom	Homozygous	Female	2012-08-18	Crlf3	2012-10-15	210	8w 2d	CRLF	C57BL/6Brd-Tyr<c-Brd>;C57BL/6Dnk;C57BL/6N;C57BL/6NTac	B6	5	B
CRLF5.1m	Crlf3:Hom	Homozygous	Female	2012-08-18	Crlf3	2012-10-15	180	8w 2d	CRLF	C57BL/6Brd-Tyr<c-Brd>;C57BL/6Dnk;C57BL/6N;C57BL/6NTac	B6	5	B
MEBW27.4f	Oxr1:Het	Heterozygous	Female	2012-08-02	Oxr1	2012-10-15	170	10w 4d	MEBW	C57BL/6N;C57BL/6NTac	B6	5	B
MEBW38.1e	Oxr1:Het	Heterozygous	Female	2012-08-15	Oxr1	2012-10-15		8w 5d	MEBW	C57BL/6N;C57BL/6NTac	B6	5	B	Excluded (as difficulty dosing)
HPAB5.1f	WT	Wildtype	Female	2012-06-12		2012-10-15	100	17w 6d	HPAB	C57BL/6N;C57BL/6NTac	B6	5	C
MYDA2.2f	WT	Wildtype	Female	2012-06-07		2012-10-15	290	18w 4d	MYDA	C57BL/6N;C57BL/6NTac	B6	5	C
MYDA2.2h	WT	Wildtype	Female	2012-06-07		2012-10-15	200	18w 4d	MYDA	C57BL/6N;C57BL/6NTac	B6	5	C
MYDA2.2i	WT	Wildtype	Female	2012-06-07		2012-10-15	205	18w 4d	MYDA	C57BL/6N;C57BL/6NTac	B6	5	C
CBLT1670.4b	WT	Wildtype	Female	2012-08-14		2012-10-15	190	8w 6d	CBLT	C57BL/6NTac	B6	5	C
CBLT1670.4c	WT	Wildtype	Female	2012-08-14		2012-10-15	216	8w 6d	CBLT	C57BL/6NTac	B6	5	C
CBLT1670.4d	WT	Wildtype	Female	2012-08-14		2012-10-15	270	8w 6d	CBLT	C57BL/6NTac	B6	5	C
CBLT1670.4e	WT	Wildtype	Female	2012-08-14		2012-10-15	295	8w 6d	CBLT	C57BL/6NTac	B6	5	C
CBLT1670.4f	WT	Wildtype	Female	2012-08-14		2012-10-15	240	8w 6d	CBLT	C57BL/6NTac	B6	5	C
CBLT1670.4g	WT	Wildtype	Female	2012-08-14		2012-10-15	180	8w 6d	CBLT	C57BL/6NTac	B6	5	C
HPAB4.1g	Glg1:Het	Heterozygous	Female	2012-07-20	Glg1	2012-10-15	275	12w 3d	HPAB	C57BL/6N;C57BL/6NTac	B6	5	C
HPAB4.1i	Glg1:Het	Heterozygous	Female	2012-07-20	Glg1	2012-10-15	235	12w 3d	HPAB	C57BL/6N;C57BL/6NTac	B6	5	C
HPAB5.1d	Glg1:Het	Heterozygous	Female	2012-06-12	Glg1	2012-10-15	200	17w 6d	HPAB	C57BL/6N;C57BL/6NTac	B6	5	C
HPAB5.1e	Glg1:Het	Heterozygous	Female	2012-06-12	Glg1	2012-10-15	320	17w 6d	HPAB	C57BL/6N;C57BL/6NTac	B6	5	C
HPAB6.1b	Glg1:Het	Heterozygous	Female	2012-06-20	Glg1	2012-10-15	180	16w 5d	HPAB	C57BL/6N;C57BL/6NTac	B6	5	C
HPAB5.1a	WT	Wildtype	Male	2012-06-12		2012-10-15	190	17w 6d	HPAB	C57BL/6N;C57BL/6NTac	B6	5	D
MYDA2.2b	WT	Wildtype	Male	2012-06-07		2012-10-15	220	18w 4d	MYDA	C57BL/6N;C57BL/6NTac	B6	5	D
MYDA2.2c	WT	Wildtype	Male	2012-06-07		2012-10-15	112	18w 4d	MYDA	C57BL/6N;C57BL/6NTac	B6	5	D
CBLT1747.2b	WT	Wildtype	Male	2012-06-30		2012-10-15	164	15w 2d	CBLT	C57BL/6NTac	B6	5	D
CBLT1747.2c	WT	Wildtype	Male	2012-06-30		2012-10-15	156	15w 2d	CBLT	C57BL/6NTac	B6	5	D
CBLT1751.1a	WT	Wildtype	Male	2012-06-28		2012-10-15	20	15w 4d	CBLT	C57BL/6NTac	B6	5	D
CBLT1751.1b	WT	Wildtype	Male	2012-06-28		2012-10-15	170	15w 4d	CBLT	C57BL/6NTac	B6	5	D
GDBD39.2a	Lacc1:Hom	Homozygous	Male	2012-06-27	Lacc1	2012-10-15	110	15w 5d	GDBD	C57BL/6N;C57BL/6NTac	B6	5	D
GDBD39.2b	Lacc1:Hom	Homozygous	Male	2012-06-27	Lacc1	2012-10-15	55	15w 5d	GDBD	C57BL/6N;C57BL/6NTac	B6	5	D
GDBD39.2c	Lacc1:Hom	Homozygous	Male	2012-06-27	Lacc1	2012-10-15	78	15w 5d	GDBD	C57BL/6N;C57BL/6NTac	B6	5	D
GDBD39.2d	Lacc1:Hom	Homozygous	Male	2012-06-27	Lacc1	2012-10-15	95	15w 5d	GDBD	C57BL/6N;C57BL/6NTac	B6	5	D
HPAB5.1b	Glg1:Het	Heterozygous	Male	2012-06-12	Glg1	2012-10-15	150	17w 6d	HPAB	C57BL/6N;C57BL/6NTac	B6	5	D
HPAB5.1c	Glg1:Het	Heterozygous	Male	2012-06-12	Glg1	2012-10-15	50	17w 6d	HPAB	C57BL/6N;C57BL/6NTac	B6	5	D
CBLT1940.2b	WT	Wildtype	Male	2012-08-13		2012-10-22	84	10w	CBLT	C57BL/6NTac	B6	5	A
CBLT1940.2c	WT	Wildtype	Male	2012-08-13		2012-10-22	175	10w	CBLT	C57BL/6NTac	B6	5	A
CBLT1940.2d	WT	Wildtype	Male	2012-08-13		2012-10-22	50	10w	CBLT	C57BL/6NTac	B6	5	A
CBLT1940.2e	WT	Wildtype	Male	2012-08-13		2012-10-22	132	10w	CBLT	C57BL/6NTac	B6	5	A
CBLT1940.2f	WT	Wildtype	Male	2012-08-13		2012-10-22	63	10w	CBLT	C57BL/6NTac	B6	5	A
CBLT1940.2g	WT	Wildtype	Male	2012-08-13		2012-10-22	40	10w	CBLT	C57BL/6NTac	B6	5	A
MEDY34.2b	Arsg:Hom	Homozygous	Male	2012-08-09	Arsg	2012-10-22	136	10w 4d	MEDY	C57BL/6N;C57BL/6NTac	B6	5	A
MEDY36.2a	Arsg:Hom	Homozygous	Male	2012-08-12	Arsg	2012-10-22	100	10w 1d	MEDY	C57BL/6N;C57BL/6NTac	B6	5	A
MEDY40.1a	Arsg:Hom	Homozygous	Male	2012-08-28	Arsg	2012-10-22	53	7w 6d	MEDY	C57BL/6N;C57BL/6NTac	B6	5	A
MEDY40.1c	Arsg:Hom	Homozygous	Male	2012-08-28	Arsg	2012-10-22	160	7w 6d	MEDY	C57BL/6N;C57BL/6NTac	B6	5	A
MDYD26.3c	Cabp1:Hom	Homozygous	Male	2012-08-22	Cabp1	2012-10-22	50	8w 5d	MDYD	C57BL/6N;C57BL/6NTac	B6	5	A
MDYD28.3a	Cabp1:Hom	Homozygous	Male	2012-08-22	Cabp1	2012-10-22	130	8w 5d	MDYD	C57BL/6N;C57BL/6NTac	B6	5	A
MDYD28.3b	Cabp1:Hom	Homozygous	Male	2012-08-22	Cabp1	2012-10-22	200	8w 5d	MDYD	C57BL/6N;C57BL/6NTac	B6	5	A
MDYD28.3c	Cabp1:Hom	Homozygous	Male	2012-08-22	Cabp1	2012-10-22	80	8w 5d	MDYD	C57BL/6N;C57BL/6NTac	B6	5	A
MDYD28.3d	Cabp1:Hom	Homozygous	Male	2012-08-22	Cabp1	2012-10-22	190	8w 5d	MDYD	C57BL/6N;C57BL/6NTac	B6	5	A
MDYD30.1c	Cabp1:Hom	Homozygous	Male	2012-08-22	Cabp1	2012-10-22	156	8w 5d	MDYD	C57BL/6N;C57BL/6NTac	B6	5	A
MEXX17.1g	WT	Wildtype	Female	2012-08-23		2012-10-22	145	8w 4d	MEXX	C57BL/6N;C57BL/6NTac	B6	5	B
MEXX19.2b	WT	Wildtype	Female	2012-08-22		2012-10-22	325	8w 5d	MEXX	C57BL/6N;C57BL/6NTac	B6	5	B
METD20.2e	WT	Wildtype	Female	2012-08-23		2012-10-22	116	8w 4d	METD	C57BL/6N;C57BL/6NTac	B6	5	B
METD20.2g	WT	Wildtype	Female	2012-08-23		2012-10-22	280	8w 4d	METD	C57BL/6N;C57BL/6NTac	B6	5	B
METD20.2h	WT	Wildtype	Female	2012-08-23		2012-10-22	260	8w 4d	METD	C57BL/6N;C57BL/6NTac	B6	5	B
MEDY35.1g	Arsg:Hom	Homozygous	Female	2012-07-28	Arsg	2012-10-22	226	12w 2d	MEDY	C57BL/6N;C57BL/6NTac	B6	5	B
MEDY36.2g	Arsg:Hom	Homozygous	Female	2012-08-12	Arsg	2012-10-22	245	10w 1d	MEDY	C57BL/6N;C57BL/6NTac	B6	5	B
MEDY38.1c	Arsg:Hom	Homozygous	Female	2012-08-01	Arsg	2012-10-22	160	11w 5d	MEDY	C57BL/6N;C57BL/6NTac	B6	5	B
MEDY38.1d	Arsg:Hom	Homozygous	Female	2012-08-01	Arsg	2012-10-22	200	11w 5d	MEDY	C57BL/6N;C57BL/6NTac	B6	5	B
MEDY40.1e	Arsg:Hom	Homozygous	Female	2012-08-28	Arsg	2012-10-22	230	7w 6d	MEDY	C57BL/6N;C57BL/6NTac	B6	5	B
MEDY40.1g	Arsg:Hom	Homozygous	Female	2012-08-28	Arsg	2012-10-22	250	7w 6d	MEDY	C57BL/6N;C57BL/6NTac	B6	5	B
MDYD28.3e	Cabp1:Hom	Homozygous	Female	2012-08-22	Cabp1	2012-10-22	136	8w 5d	MDYD	C57BL/6N;C57BL/6NTac	B6	5	B
MDYD28.3f	Cabp1:Hom	Homozygous	Female	2012-08-22	Cabp1	2012-10-22	145	8w 5d	MDYD	C57BL/6N;C57BL/6NTac	B6	5	B
MDYD28.3g	Cabp1:Hom	Homozygous	Female	2012-08-22	Cabp1	2012-10-22	230	8w 5d	MDYD	C57BL/6N;C57BL/6NTac	B6	5	B
MDYD30.1g	Cabp1:Hom	Homozygous	Female	2012-08-22	Cabp1	2012-10-22	226	8w 5d	MDYD	C57BL/6N;C57BL/6NTac	B6	5	B
MDYD30.1j	Cabp1:Hom	Homozygous	Female	2012-08-22	Cabp1	2012-10-22	330	8w 5d	MDYD	C57BL/6N;C57BL/6NTac	B6	5	B
CBLT1861.4d	WT	Wildtype	Female	2012-08-23		2012-10-22	350	8w 4d	CBLT	C57BL/6NTac	B6	5	C
CBLT1861.4e	WT	Wildtype	Female	2012-08-23		2012-10-22	390	8w 4d	CBLT	C57BL/6NTac	B6	5	C
CBLT1861.4f	WT	Wildtype	Female	2012-08-23		2012-10-22	370	8w 4d	CBLT	C57BL/6NTac	B6	5	C
CBLT1861.4g	WT	Wildtype	Female	2012-08-23		2012-10-22	360	8w 4d	CBLT	C57BL/6NTac	B6	5	C
CBLT1861.4h	WT	Wildtype	Female	2012-08-23		2012-10-22	400	8w 4d	CBLT	C57BL/6NTac	B6	5	C
CBLT1861.4i	WT	Wildtype	Female	2012-08-23		2012-10-22	340	8w 4d	CBLT	C57BL/6NTac	B6	5	C
CBLT1947.2k	WT	Wildtype	Female	2012-08-14		2012-10-22	156	9w 6d	CBLT	C57BL/6NTac	B6	5	C
CBLT2058.2d	WT	Wildtype	Female	2012-08-12		2012-10-22	280	10w 1d	CBLT	C57BL/6NTac	B6	5	C
CBLT2058.2e	WT	Wildtype	Female	2012-08-12		2012-10-22	270	10w 1d	CBLT	C57BL/6NTac	B6	5	C
CBLT2058.2f	WT	Wildtype	Female	2012-08-12		2012-10-22	280	10w 1d	CBLT	C57BL/6NTac	B6	5	C
CBLT2058.2g	WT	Wildtype	Female	2012-08-12		2012-10-22	245	10w 1d	CBLT	C57BL/6NTac	B6	5	C
CBLT2058.2h	WT	Wildtype	Female	2012-08-12		2012-10-22	210	10w 1d	CBLT	C57BL/6NTac	B6	5	C
BCGD13.1d	BC017643:Hom	Homozygous	Female	2012-08-23	BC017643	2012-10-22	122	8w 4d	BCGD	C57BL/6N;C57BL/6NTac	B6	5	C
BCGD13.1e	BC017643:Hom	Homozygous	Female	2012-08-23	BC017643	2012-10-22	60	8w 4d	BCGD	C57BL/6N;C57BL/6NTac	B6	5	C
BCGD13.1f	BC017643:Hom	Homozygous	Female	2012-08-23	BC017643	2012-10-22	118	8w 4d	BCGD	C57BL/6N;C57BL/6NTac	B6	5	C
BCGD13.1g	BC017643:Hom	Homozygous	Female	2012-08-23	BC017643	2012-10-22	185	8w 4d	BCGD	C57BL/6N;C57BL/6NTac	B6	5	C
MDFE39.3b	Clk1:Hom	Homozygous	Female	2012-08-07	Clk1	2012-10-22	230	10w 6d	MDFE	C57BL/6NTac	B6	5	C
MDFE39.3c	Clk1:Hom	Homozygous	Female	2012-08-07	Clk1	2012-10-22	170	10w 6d	MDFE	C57BL/6NTac	B6	5	C
MDFE39.3d	Clk1:Hom	Homozygous	Female	2012-08-07	Clk1	2012-10-22	170	10w 6d	MDFE	C57BL/6NTac	B6	5	C
MDFE39.4c	Clk1:Hom	Homozygous	Female	2012-08-30	Clk1	2012-10-22	75	7w 4d	MDFE	C57BL/6NTac	B6	5	C
MDFE39.4d	Clk1:Hom	Homozygous	Female	2012-08-30	Clk1	2012-10-22	246	7w 4d	MDFE	C57BL/6NTac	B6	5	C
MDFE42.1e	Clk1:Hom	Homozygous	Female	2012-06-19	Clk1	2012-10-22	210	17w 6d	MDFE	C57BL/6NTac	B6	5	C
CBLT2021.2a	WT	Wildtype	Male	2012-08-23		2012-10-29	340	9w 4d	CBLT	C57BL/6NTac	B6	5	A
CBLT2021.2b	WT	Wildtype	Male	2012-08-23		2012-10-29	210	9w 4d	CBLT	C57BL/6NTac	B6	5	A
CBLT2021.2c	WT	Wildtype	Male	2012-08-23		2012-10-29	270	9w 4d	CBLT	C57BL/6NTac	B6	5	A
CBLT2021.2d	WT	Wildtype	Male	2012-08-23		2012-10-29	220	9w 4d	CBLT	C57BL/6NTac	B6	5	A
CBLT2021.2e	WT	Wildtype	Male	2012-08-23		2012-10-29	330	9w 4d	CBLT	C57BL/6NTac	B6	5	A
CBLT2021.2f	WT	Wildtype	Male	2012-08-23		2012-10-29	310	9w 4d	CBLT	C57BL/6NTac	B6	5	A
MECG24.2a	Casp12:Hom	Homozygous	Male	2012-08-24	Casp12	2012-10-29	300	9w 3d	MECG	C57BL/6N;C57BL/6NTac	B6	5	A
MECG24.2c	Casp12:Hom	Homozygous	Male	2012-08-24	Casp12	2012-10-29	300	9w 3d	MECG	C57BL/6N;C57BL/6NTac	B6	5	A
MECG32.1a	Casp12:Hom	Homozygous	Male	2012-09-05	Casp12	2012-10-29	218	7w 5d	MECG	C57BL/6N;C57BL/6NTac	B6	5	A
MECG32.1b	Casp12:Hom	Homozygous	Male	2012-09-05	Casp12	2012-10-29	240	7w 5d	MECG	C57BL/6N;C57BL/6NTac	B6	5	A
MECG32.1d	Casp12:Hom	Homozygous	Male	2012-09-05	Casp12	2012-10-29	208	7w 5d	MECG	C57BL/6N;C57BL/6NTac	B6	5	A
MECG34.1a	Casp12:Hom	Homozygous	Male	2012-08-30	Casp12	2012-10-29	366	8w 4d	MECG	C57BL/6N;C57BL/6NTac	B6	5	A
GDBB24.1c	Il22ra1:Hom	Homozygous	Male	2012-09-19	Il22ra1	2012-10-29	370	5w 5d	GDBB	C57BL/6N;C57BL/6NTac	B6	5	A
MENP22.2b	Leprot:Hom	Homozygous	Male	2012-08-29	Leprot	2012-10-29	250	8w 5d	MENP	C57BL/6N;C57BL/6NTac	B6	5	A
MENP22.2c	Leprot:Hom	Homozygous	Male	2012-08-29	Leprot	2012-10-29	210	8w 5d	MENP	C57BL/6N;C57BL/6NTac	B6	5	A
MENP22.2d	Leprot:Hom	Homozygous	Male	2012-08-29	Leprot	2012-10-29	320	8w 5d	MENP	C57BL/6N;C57BL/6NTac	B6	5	A
MENP22.2g	Leprot:Hom	Homozygous	Male	2012-08-29	Leprot	2012-10-29	355	8w 5d	MENP	C57BL/6N;C57BL/6NTac	B6	5	A
MENP22.2h	Leprot:Hom	Homozygous	Male	2012-08-29	Leprot	2012-10-29	220	8w 5d	MENP	C57BL/6N;C57BL/6NTac	B6	5	A
GDBB24.1b	Il22ra1:Het	Heterozygous	Male	2012-09-19	Il22ra1	2012-10-29	320	5w 5d	GDBB	C57BL/6N;C57BL/6NTac	B6	5	A
GDBB24.1g	WT	Wildtype	Female	2012-09-19		2012-10-29	108	5w 5d	GDBB	C57BL/6N;C57BL/6NTac	B6	5	B
GDBB24.1h	WT	Wildtype	Female	2012-09-19		2012-10-29	145	5w 5d	GDBB	C57BL/6N;C57BL/6NTac	B6	5	B
MDXP26.2d	WT	Wildtype	Female	2012-09-03		2012-10-29	250	8w	MDXP	C57BL/6N;C57BL/6NTac	B6	5	B
MDXP26.2e	WT	Wildtype	Female	2012-09-03		2012-10-29	240	8w	MDXP	C57BL/6N;C57BL/6NTac	B6	5	B
MDXP26.2f	WT	Wildtype	Female	2012-09-03		2012-10-29	220	8w	MDXP	C57BL/6N;C57BL/6NTac	B6	5	B
MDFF40.2e	WT	Wildtype	Female	2012-09-03		2012-10-29	308	8w	MDFF	C57BL/6N;C57BL/6NTac	B6	5	B
MDFF40.2g	WT	Wildtype	Female	2012-09-03		2012-10-29	385	8w	MDFF	C57BL/6N;C57BL/6NTac	B6	5	B
GDBB24.1f	Il22ra1:Hom	Homozygous	Female	2012-09-19	Il22ra1	2012-10-29	316	5w 5d	GDBB	C57BL/6N;C57BL/6NTac	B6	5	B
MENP22.2i	Leprot:Hom	Homozygous	Female	2012-08-29	Leprot	2012-10-29	290	8w 5d	MENP	C57BL/6N;C57BL/6NTac	B6	5	B
MENP22.2j	Leprot:Hom	Homozygous	Female	2012-08-29	Leprot	2012-10-29	300	8w 5d	MENP	C57BL/6N;C57BL/6NTac	B6	5	B
MENP22.2k	Leprot:Hom	Homozygous	Female	2012-08-29	Leprot	2012-10-29	310	8w 5d	MENP	C57BL/6N;C57BL/6NTac	B6	5	B
MENP22.2l	Leprot:Hom	Homozygous	Female	2012-08-29	Leprot	2012-10-29	320	8w 5d	MENP	C57BL/6N;C57BL/6NTac	B6	5	B
MENP22.2m	Leprot:Hom	Homozygous	Female	2012-08-29	Leprot	2012-10-29	400	8w 5d	MENP	C57BL/6N;C57BL/6NTac	B6	5	B
GDBB24.1e	Il22ra1:Het	Heterozygous	Female	2012-09-19	Il22ra1	2012-10-29	280	5w 5d	GDBB	C57BL/6N;C57BL/6NTac	B6	5	B
MEHY20.1g	WT	Wildtype	Female	2012-09-03		2012-10-29	250	8w	MEHY	C57BL/6N;C57BL/6NTac	B6	5	C
MEHY20.1i	WT	Wildtype	Female	2012-09-03		2012-10-29	210	8w	MEHY	C57BL/6N;C57BL/6NTac	B6	5	C
MEHY21.1a	WT	Wildtype	Female	2012-09-05		2012-10-29	225	7w 5d	MEHY	C57BL/6N;C57BL/6NTac	B6	5	C
MEZD18.1e	WT	Wildtype	Female	2012-09-07		2012-10-29	330	7w 3d	MEZD	C57BL/6N;C57BL/6NTac	B6	5	C
MEZD18.1f	WT	Wildtype	Female	2012-09-07		2012-10-29	240	7w 3d	MEZD	C57BL/6N;C57BL/6NTac	B6	5	C
MEZD18.1h	WT	Wildtype	Female	2012-09-07		2012-10-29	260	7w 3d	MEZD	C57BL/6N;C57BL/6NTac	B6	5	C
ILTT24.1g	WT	Wildtype	Female	2012-08-27		2012-10-29	110	9w	ILTT	C57BL/6NTac;C57BL/6J	B6	5	C
CBLT1725.5b	WT	Wildtype	Female	2012-08-29		2012-10-29	266	8w 5d	CBLT	C57BL/6NTac	B6	5	C
CBLT1725.5c	WT	Wildtype	Female	2012-08-29		2012-10-29	75	8w 5d	CBLT	C57BL/6NTac	B6	5	C
CBLT1725.5d	WT	Wildtype	Female	2012-08-29		2012-10-29		8w 5d	CBLT	C57BL/6NTac	B6	5	C	Excluded (count <30 so presumed failed dosing)
CBLT1725.5e	WT	Wildtype	Female	2012-08-29		2012-10-29	300	8w 5d	CBLT	C57BL/6NTac	B6	5	C
CBLT2069.2f	WT	Wildtype	Female	2012-08-30		2012-10-29	265	8w 4d	CBLT	C57BL/6NTac	B6	5	C
CBLT2069.2g	WT	Wildtype	Female	2012-08-30		2012-10-29	190	8w 4d	CBLT	C57BL/6NTac	B6	5	C
MEFJ21.2e	Praf2(e):Hom	Homozygous	Female	2012-08-28	Praf2	2012-10-29	170	8w 6d	MEFJ	C57BL/6N;C57BL/6NTac	B6	5	C
MEFJ21.2f	Praf2(e):Hom	Homozygous	Female	2012-08-28	Praf2	2012-10-29	290	8w 6d	MEFJ	C57BL/6N;C57BL/6NTac	B6	5	C
MEFJ24.1c	Praf2(e):Hom	Homozygous	Female	2012-08-26	Praf2	2012-10-29	190	9w 1d	MEFJ	C57BL/6N;C57BL/6NTac	B6	5	C
MEFJ24.1d	Praf2(e):Hom	Homozygous	Female	2012-08-26	Praf2	2012-10-29	180	9w 1d	MEFJ	C57BL/6N;C57BL/6NTac	B6	5	C
MEFJ25.1d	Praf2(e):Hom	Homozygous	Female	2012-08-30	Praf2	2012-10-29	250	8w 4d	MEFJ	C57BL/6N;C57BL/6NTac	B6	5	C
ILTT24.1d	Il22:Het	Heterozygous	Female	2012-08-27	Il22	2012-10-29	320	9w	ILTT	C57BL/6NTac;C57BL/6J	B6	5	C
ILTT24.1e	Il22:Het	Heterozygous	Female	2012-08-27	Il22	2012-10-29	360	9w	ILTT	C57BL/6NTac;C57BL/6J	B6	5	C
ILTT24.1f	Il22:Het	Heterozygous	Female	2012-08-27	Il22	2012-10-29	290	9w	ILTT	C57BL/6NTac;C57BL/6J	B6	5	C
MEZD17.1f	WT	Wildtype	Female	2012-09-10		2012-11-19	90	10w	MEZD	C57BL/6N;C57BL/6NTac	B6	5	A
MEZD17.1h	WT	Wildtype	Female	2012-09-10		2012-11-19	210	10w	MEZD	C57BL/6N;C57BL/6NTac	B6	5	A
MEZD17.1i	WT	Wildtype	Female	2012-09-10		2012-11-19	175	10w	MEZD	C57BL/6N;C57BL/6NTac	B6	5	A
IRFS1.1k	WT	Wildtype	Female	2012-09-26		2012-11-19	240	7w 5d	IRFS	C57BL/6N;C57BL/6NTac	B6	5	A
IRFS1.1l	WT	Wildtype	Female	2012-09-26		2012-11-19	285	7w 5d	IRFS	C57BL/6N;C57BL/6NTac	B6	5	A
IRFS1.1m	WT	Wildtype	Female	2012-09-26		2012-11-19	270	7w 5d	IRFS	C57BL/6N;C57BL/6NTac	B6	5	A
IRFS1.1o	WT	Wildtype	Female	2012-09-26		2012-11-19	185	7w 5d	IRFS	C57BL/6N;C57BL/6NTac	B6	5	A
IRFS1.1p	WT	Wildtype	Female	2012-09-26		2012-11-19	290	7w 5d	IRFS	C57BL/6N;C57BL/6NTac	B6	5	A
IRFS3.1e	WT	Wildtype	Female	2012-09-29		2012-11-19	250	7w 2d	IRFS	C57BL/6N;C57BL/6NTac	B6	5	A
MEKD30.1c	WT	Wildtype	Female	2012-09-12		2012-11-19	180	9w 5d	MEKD	C57BL/6N;C57BL/6NTac	B6	5	A
MEKD30.1d	WT	Wildtype	Female	2012-09-12		2012-11-19	164	9w 5d	MEKD	C57BL/6N;C57BL/6NTac	B6	5	A
MEKD30.1h	WT	Wildtype	Female	2012-09-12		2012-11-19	220	9w 5d	MEKD	C57BL/6N;C57BL/6NTac	B6	5	A
IDO1.1e	Ido1:Hom	Homozygous	Female	2012-09-26	Ido1	2012-11-19	315	7w 5d	IDO	C57BL/6N;C57BL/6NTac	B6	5	A
IDO1.1f	Ido1:Hom	Homozygous	Female	2012-09-26	Ido1	2012-11-19	335	7w 5d	IDO	C57BL/6N;C57BL/6NTac	B6	5	A
IDO1.1h	Ido1:Hom	Homozygous	Female	2012-09-26	Ido1	2012-11-19	350	7w 5d	IDO	C57BL/6N;C57BL/6NTac	B6	5	A
MEEK24.1d	Rhox13:Hom	Homozygous	Female	2012-09-27	Rhox13	2012-11-19	370	7w 4d	MEEK	C57BL/6N;C57BL/6NTac	B6	5	A
MEEK24.1e	Rhox13:Hom	Homozygous	Female	2012-09-27	Rhox13	2012-11-19		7w 4d	MEEK	C57BL/6N;C57BL/6NTac	B6	5	A
MEEK29.2e	Rhox13:Hom	Homozygous	Female	2012-09-24	Rhox13	2012-11-19	305	8w	MEEK	C57BL/6N;C57BL/6NTac	B6	5	A
MEEK29.2f	Rhox13:Hom	Homozygous	Female	2012-09-24	Rhox13	2012-11-19	240	8w	MEEK	C57BL/6N;C57BL/6NTac	B6	5	A
MEEK29.2h	Rhox13:Hom	Homozygous	Female	2012-09-24	Rhox13	2012-11-19	305	8w	MEEK	C57BL/6N;C57BL/6NTac	B6	5	A
CYFP10.1a	WT	Wildtype	Male	2012-09-26		2012-11-19	200	7w 5d	CYFP	C57BL/6N;C57BL/6NTac	B6	5	B
CYFP5.1a	WT	Wildtype	Male	2012-09-25		2012-11-19	260	7w 6d	CYFP	C57BL/6N;C57BL/6NTac	B6	5	B
CYFP5.1b	WT	Wildtype	Male	2012-09-25		2012-11-19	210	7w 6d	CYFP	C57BL/6N;C57BL/6NTac	B6	5	B
CYFP5.1f	WT	Wildtype	Male	2012-09-25		2012-11-19	100	7w 6d	CYFP	C57BL/6N;C57BL/6NTac	B6	5	B
CYFP5.1g	WT	Wildtype	Male	2012-09-25		2012-11-19	210	7w 6d	CYFP	C57BL/6N;C57BL/6NTac	B6	5	B
CYFP8.1a	WT	Wildtype	Male	2012-09-25		2012-11-19	188	7w 6d	CYFP	C57BL/6N;C57BL/6NTac	B6	5	B
CYFP8.1c	WT	Wildtype	Male	2012-09-25		2012-11-19	240	7w 6d	CYFP	C57BL/6N;C57BL/6NTac	B6	5	B
CBLT2098.3b	WT	Wildtype	Male	2012-09-09		2012-11-19	160	10w 1d	CBLT	C57BL/6NTac	B6	5	B
CBLT2098.3c	WT	Wildtype	Male	2012-09-09		2012-11-19	75	10w 1d	CBLT	C57BL/6NTac	B6	5	B
CBLT2098.3d	WT	Wildtype	Male	2012-09-09		2012-11-19	105	10w 1d	CBLT	C57BL/6NTac	B6	5	B
CBLT2098.3e	WT	Wildtype	Male	2012-09-09		2012-11-19	91	10w 1d	CBLT	C57BL/6NTac	B6	5	B
CBLT2199.2a	WT	Wildtype	Male	2012-09-13		2012-11-19	160	9w 4d	CBLT	C57BL/6NTac	B6	5	B
CBLT2199.2b	WT	Wildtype	Male	2012-09-13		2012-11-19	84	9w 4d	CBLT	C57BL/6NTac	B6	5	B
CYFP10.1b	Cyfip1:Het	Heterozygous	Male	2012-09-26	Cyfip1	2012-11-19	210	7w 5d	CYFP	C57BL/6N;C57BL/6NTac	B6	5	B
CYFP10.1c	Cyfip1:Het	Heterozygous	Male	2012-09-26	Cyfip1	2012-11-19	150	7w 5d	CYFP	C57BL/6N;C57BL/6NTac	B6	5	B
CYFP5.1c	Cyfip1:Het	Heterozygous	Male	2012-09-25	Cyfip1	2012-11-19	160	7w 6d	CYFP	C57BL/6N;C57BL/6NTac	B6	5	B
CYFP5.1d	Cyfip1:Het	Heterozygous	Male	2012-09-25	Cyfip1	2012-11-19	250	7w 6d	CYFP	C57BL/6N;C57BL/6NTac	B6	5	B
CYFP5.1e	Cyfip1:Het	Heterozygous	Male	2012-09-25	Cyfip1	2012-11-19	280	7w 6d	CYFP	C57BL/6N;C57BL/6NTac	B6	5	B
CYFP8.1b	Cyfip1:Het	Heterozygous	Male	2012-09-25	Cyfip1	2012-11-19	300	7w 6d	CYFP	C57BL/6N;C57BL/6NTac	B6	5	B
CRLF3.2c	WT	Wildtype	Male	2012-09-26		2012-11-26	236	8w 5d	CRLF	C57BL/6Brd-Tyr<c-Brd>;C57BL/6Dnk;C57BL/6N;C57BL/6NTac	B6	5	A
CRLF3.2d	WT	Wildtype	Male	2012-09-26		2012-11-26	350	8w 5d	CRLF	C57BL/6Brd-Tyr<c-Brd>;C57BL/6Dnk;C57BL/6N;C57BL/6NTac	B6	5	A
CRLF3.2e	WT	Wildtype	Male	2012-09-26		2012-11-26	340	8w 5d	CRLF	C57BL/6Brd-Tyr<c-Brd>;C57BL/6Dnk;C57BL/6N;C57BL/6NTac	B6	5	A
CRLF3.2f	WT	Wildtype	Male	2012-09-26		2012-11-26	200	8w 5d	CRLF	C57BL/6Brd-Tyr<c-Brd>;C57BL/6Dnk;C57BL/6N;C57BL/6NTac	B6	5	A
SPN5.1a	WT	Wildtype	Male	2012-09-29		2012-11-26	155	8w 2d	SPN	C57BL/6Brd-Tyr<c-Brd>;C57BL/6N;C57BL/6NTac	B6	5	A
SPN5.1b	WT	Wildtype	Male	2012-09-29		2012-11-26	220	8w 2d	SPN	C57BL/6Brd-Tyr<c-Brd>;C57BL/6N;C57BL/6NTac	B6	5	A
SPN5.1d	WT	Wildtype	Male	2012-09-29		2012-11-26	160	8w 2d	SPN	C57BL/6Brd-Tyr<c-Brd>;C57BL/6N;C57BL/6NTac	B6	5	A
MDHD47.2a	Calcoco2:Hom	Homozygous	Male	2012-10-02	Calcoco2	2012-11-26	240	7w 6d	MDHD	C57BL/6N;C57BL/6NTac	B6	5	A
SPN1.2a	Spns2:Hom	Homozygous	Male	2012-09-30	Spns2	2012-11-26	22	8w 1d	SPN	C57BL/6Brd-Tyr<c-Brd>;C57BL/6Dnk;C57BL/6N;C57BL/6NTac	B6	5	A
SPN1.2d	Spns2:Hom	Homozygous	Male	2012-09-30	Spns2	2012-11-26	60	8w 1d	SPN	C57BL/6Brd-Tyr<c-Brd>;C57BL/6Dnk;C57BL/6N;C57BL/6NTac	B6	5	A
SPN5.1c	Spns2:Hom	Homozygous	Male	2012-09-29	Spns2	2012-11-26	20	8w 2d	SPN	C57BL/6Brd-Tyr<c-Brd>;C57BL/6N;C57BL/6NTac	B6	5	A
SPN5.1e	Spns2:Hom	Homozygous	Male	2012-09-29	Spns2	2012-11-26	7	8w 2d	SPN	C57BL/6Brd-Tyr<c-Brd>;C57BL/6N;C57BL/6NTac	B6	5	A
SPN5.1h	Spns2:Hom	Homozygous	Male	2012-09-29	Spns2	2012-11-26	36	8w 2d	SPN	C57BL/6Brd-Tyr<c-Brd>;C57BL/6N;C57BL/6NTac	B6	5	A
SPN1.2b	Spns2:Het	Heterozygous	Male	2012-09-30	Spns2	2012-11-26	100	8w 1d	SPN	C57BL/6Brd-Tyr<c-Brd>;C57BL/6Dnk;C57BL/6N;C57BL/6NTac	B6	5	A
SPN1.2c	Spns2:Het	Heterozygous	Male	2012-09-30	Spns2	2012-11-26	160	8w 1d	SPN	C57BL/6Brd-Tyr<c-Brd>;C57BL/6Dnk;C57BL/6N;C57BL/6NTac	B6	5	A
MFCP20.1b	WT	Wildtype	Female	2012-10-02		2012-11-26	370	7w 6d	MFCP	C57BL/6N;C57BL/6NTac	B6	5	B
MFCP20.1c	WT	Wildtype	Female	2012-10-02		2012-11-26	280	7w 6d	MFCP	C57BL/6N;C57BL/6NTac	B6	5	B
MFCP20.1d	WT	Wildtype	Female	2012-10-02		2012-11-26	285	7w 6d	MFCP	C57BL/6N;C57BL/6NTac	B6	5	B
MFCP21.1a	WT	Wildtype	Female	2012-10-02		2012-11-26	260	7w 6d	MFCP	C57BL/6N;C57BL/6NTac	B6	5	B
SPN3.1d	WT	Wildtype	Female	2012-09-24		2012-11-26	200	9w	SPN	C57BL/6Brd-Tyr<c-Brd>;C57BL/6N;C57BL/6NTac	B6	5	B
SPN5.1j	WT	Wildtype	Female	2012-09-29		2012-11-26	150	8w 2d	SPN	C57BL/6Brd-Tyr<c-Brd>;C57BL/6N;C57BL/6NTac	B6	5	B
SPN5.1p	WT	Wildtype	Female	2012-09-29		2012-11-26	210	8w 2d	SPN	C57BL/6Brd-Tyr<c-Brd>;C57BL/6N;C57BL/6NTac	B6	5	B
CBLT2098.3g	WT	Wildtype	Female	2012-09-09		2012-11-26	150	11w 1d	CBLT	C57BL/6NTac	B6	5	B
CBLT2098.3h	WT	Wildtype	Female	2012-09-09		2012-11-26	256	11w 1d	CBLT	C57BL/6NTac	B6	5	B
CBLT2098.3i	WT	Wildtype	Female	2012-09-09		2012-11-26	150	11w 1d	CBLT	C57BL/6NTac	B6	5	B
CBLT2098.3j	WT	Wildtype	Female	2012-09-09		2012-11-26	150	11w 1d	CBLT	C57BL/6NTac	B6	5	B
CBLT2199.2c	WT	Wildtype	Female	2012-09-13		2012-11-26	310	10w 4d	CBLT	C57BL/6NTac	B6	5	B
CBLT2199.2d	WT	Wildtype	Female	2012-09-13		2012-11-26	260	10w 4d	CBLT	C57BL/6NTac	B6	5	B
MDHD47.2d	Calcoco2:Hom	Homozygous	Female	2012-10-02	Calcoco2	2012-11-26	310	7w 6d	MDHD	C57BL/6N;C57BL/6NTac	B6	5	B
MDHD47.2g	Calcoco2:Hom	Homozygous	Female	2012-10-02	Calcoco2	2012-11-26	270	7w 6d	MDHD	C57BL/6N;C57BL/6NTac	B6	5	B
MDHD47.2h	Calcoco2:Hom	Homozygous	Female	2012-10-02	Calcoco2	2012-11-26	210	7w 6d	MDHD	C57BL/6N;C57BL/6NTac	B6	5	B
MDHD47.2i	Calcoco2:Hom	Homozygous	Female	2012-10-02	Calcoco2	2012-11-26	270	7w 6d	MDHD	C57BL/6N;C57BL/6NTac	B6	5	B
MDHD51.3b	Calcoco2:Hom	Homozygous	Female	2012-09-19	Calcoco2	2012-11-26	230	9w 5d	MDHD	C57BL/6N;C57BL/6NTac	B6	5	B
SPN1.2f	Spns2:Hom	Homozygous	Female	2012-09-30	Spns2	2012-11-26	25	8w 1d	SPN	C57BL/6Brd-Tyr<c-Brd>;C57BL/6Dnk;C57BL/6N;C57BL/6NTac	B6	5	B
SPN3.1e	Spns2:Het	Heterozygous	Female	2012-09-24	Spns2	2012-11-26	120	9w	SPN	C57BL/6Brd-Tyr<c-Brd>;C57BL/6N;C57BL/6NTac	B6	5	B
MDRZ27.2d	WT	Wildtype	Male	2012-09-18		2012-11-26	165	9w 6d	MDRZ	C57BL/6N;C57BL/6NTac	B6	5	C
MDRZ28.2a	WT	Wildtype	Male	2012-09-18		2012-11-26	245	9w 6d	MDRZ	C57BL/6N;C57BL/6NTac	B6	5	C
MDRZ28.2c	WT	Wildtype	Male	2012-09-18		2012-11-26	180	9w 6d	MDRZ	C57BL/6N;C57BL/6NTac	B6	5	C
IRFS1.1a	WT	Wildtype	Male	2012-09-26		2012-11-26	330	8w 5d	IRFS	C57BL/6N;C57BL/6NTac	B6	5	C
IRFS1.1b	WT	Wildtype	Male	2012-09-26		2012-11-26	175	8w 5d	IRFS	C57BL/6N;C57BL/6NTac	B6	5	C
IRFS1.1c	WT	Wildtype	Male	2012-09-26		2012-11-26	200	8w 5d	IRFS	C57BL/6N;C57BL/6NTac	B6	5	C
IRFS1.1d	WT	Wildtype	Male	2012-09-26		2012-11-26	238	8w 5d	IRFS	C57BL/6N;C57BL/6NTac	B6	5	C
IRFS1.1g	WT	Wildtype	Male	2012-09-26		2012-11-26	260	8w 5d	IRFS	C57BL/6N;C57BL/6NTac	B6	5	C
IRFS1.1h	WT	Wildtype	Male	2012-09-26		2012-11-26	200	8w 5d	IRFS	C57BL/6N;C57BL/6NTac	B6	5	C
MDRZ27.2a	Gbf1:Het	Heterozygous	Male	2012-09-18	Gbf1	2012-11-26	135	9w 6d	MDRZ	C57BL/6N;C57BL/6NTac	B6	5	C
MDRZ28.2b	Gbf1:Het	Heterozygous	Male	2012-09-18	Gbf1	2012-11-26	215	9w 6d	MDRZ	C57BL/6N;C57BL/6NTac	B6	5	C
MDRZ32.2a	Gbf1:Het	Heterozygous	Male	2012-09-22	Gbf1	2012-11-26	210	9w 2d	MDRZ	C57BL/6N;C57BL/6NTac	B6	5	C
MDRZ32.2b	Gbf1:Het	Heterozygous	Male	2012-09-22	Gbf1	2012-11-26	280	9w 2d	MDRZ	C57BL/6N;C57BL/6NTac	B6	5	C
MDRZ32.2c	Gbf1:Het	Heterozygous	Male	2012-09-22	Gbf1	2012-11-26	200	9w 2d	MDRZ	C57BL/6N;C57BL/6NTac	B6	5	C
MDRZ33.2a	Gbf1:Het	Heterozygous	Male	2012-09-30	Gbf1	2012-11-26	248	8w 1d	MDRZ	C57BL/6N;C57BL/6NTac	B6	5	C
MDRZ33.2b	Gbf1:Het	Heterozygous	Male	2012-09-30	Gbf1	2012-11-26	400	8w 1d	MDRZ	C57BL/6N;C57BL/6NTac	B6	5	C
MDRZ33.2c	Gbf1:Het	Heterozygous	Male	2012-09-30	Gbf1	2012-11-26	300	8w 1d	MDRZ	C57BL/6N;C57BL/6NTac	B6	5	C
MDRZ33.2d	Gbf1:Het	Heterozygous	Male	2012-09-30	Gbf1	2012-11-26	310	8w 1d	MDRZ	C57BL/6N;C57BL/6NTac	B6	5	C
MCQP77.3d	WT	Wildtype	Female	2012-09-28		2012-11-26	265	8w 3d	MCQP	C57BL/6N;C57BL/6NTac	B6	5	D
MCQP77.3f	WT	Wildtype	Female	2012-09-28		2012-11-26	370	8w 3d	MCQP	C57BL/6N;C57BL/6NTac	B6	5	D
MCQP78.2e	WT	Wildtype	Female	2012-09-27		2012-11-26	110	8w 4d	MCQP	C57BL/6N;C57BL/6NTac	B6	5	D
CYFP9.1d	WT	Wildtype	Female	2012-09-28		2012-11-26	350	8w 3d	CYFP	C57BL/6N;C57BL/6NTac	B6	5	D
CYFP9.1e	WT	Wildtype	Female	2012-09-28		2012-11-26	240	8w 3d	CYFP	C57BL/6N;C57BL/6NTac	B6	5	D
CYFP9.1f	WT	Wildtype	Female	2012-09-28		2012-11-26	290	8w 3d	CYFP	C57BL/6N;C57BL/6NTac	B6	5	D
MDNJ28.2i	WT	Wildtype	Female	2012-09-25		2012-11-26	150	8w 6d	MDNJ	C57BL/6N;C57BL/6NTac	B6	5	D
MDNJ28.2k	WT	Wildtype	Female	2012-09-25		2012-11-26	195	8w 6d	MDNJ	C57BL/6N;C57BL/6NTac	B6	5	D
MDNJ28.2l	WT	Wildtype	Female	2012-09-25		2012-11-26	290	8w 6d	MDNJ	C57BL/6N;C57BL/6NTac	B6	5	D
CYFP10.1e	WT	Wildtype	Female	2012-09-26		2012-11-26	230	8w 5d	CYFP	C57BL/6N;C57BL/6NTac	B6	5	D
CYFP10.1d	Cyfip1:Het	Heterozygous	Female	2012-09-26	Cyfip1	2012-11-26	300	8w 5d	CYFP	C57BL/6N;C57BL/6NTac	B6	5	D
CYFP10.1f	Cyfip1:Het	Heterozygous	Female	2012-09-26	Cyfip1	2012-11-26	250	8w 5d	CYFP	C57BL/6N;C57BL/6NTac	B6	5	D
CYFP10.1g	Cyfip1:Het	Heterozygous	Female	2012-09-26	Cyfip1	2012-11-26	280	8w 5d	CYFP	C57BL/6N;C57BL/6NTac	B6	5	D
CYFP9.1a	Cyfip1:Het	Heterozygous	Female	2012-09-28	Cyfip1	2012-11-26	250	8w 3d	CYFP	C57BL/6N;C57BL/6NTac	B6	5	D
CYFP9.1b	Cyfip1:Het	Heterozygous	Female	2012-09-28	Cyfip1	2012-11-26	310	8w 3d	CYFP	C57BL/6N;C57BL/6NTac	B6	5	D
CYFP9.1c	Cyfip1:Het	Heterozygous	Female	2012-09-28	Cyfip1	2012-11-26	200	8w 3d	CYFP	C57BL/6N;C57BL/6NTac	B6	5	D
CYFP9.1h	Cyfip1:Het	Heterozygous	Female	2012-09-28	Cyfip1	2012-11-26	240	8w 3d	CYFP	C57BL/6N;C57BL/6NTac	B6	5	D
CBLT1879.4b	WT	Wildtype	Male	2012-09-15		2012-12-03	100	11w 2d	CBLT	C57BL/6NTac	B6	5	A
CBLT1879.4c	WT	Wildtype	Male	2012-09-15		2012-12-03		11w 2d	CBLT	C57BL/6NTac	B6	5	A	Excluded (count <30 so presumed failed dosing)
CBLT1879.4d	WT	Wildtype	Male	2012-09-15		2012-12-03	70	11w 2d	CBLT	C57BL/6NTac	B6	5	A
CBLT1879.4e	WT	Wildtype	Male	2012-09-15		2012-12-03	250	11w 2d	CBLT	C57BL/6NTac	B6	5	A
CBLT1934.3a	WT	Wildtype	Male	2012-09-13		2012-12-03	130	11w 4d	CBLT	C57BL/6NTac	B6	5	A
CBLT1934.3b	WT	Wildtype	Male	2012-09-13		2012-12-03	135	11w 4d	CBLT	C57BL/6NTac	B6	5	A
MEQF19.2a	Ninj2:Hom	Homozygous	Male	2012-09-22	Ninj2	2012-12-03	300	10w 2d	MEQF	C57BL/6N;C57BL/6NTac	B6	5	A
MEQF19.2b	Ninj2:Hom	Homozygous	Male	2012-09-22	Ninj2	2012-12-03	130	10w 2d	MEQF	C57BL/6N;C57BL/6NTac	B6	5	A
MEQF19.2d	Ninj2:Hom	Homozygous	Male	2012-09-22	Ninj2	2012-12-03	135	10w 2d	MEQF	C57BL/6N;C57BL/6NTac	B6	5	A
MEQF20.2d	Ninj2:Hom	Homozygous	Male	2012-10-05	Ninj2	2012-12-03	114	8w 3d	MEQF	C57BL/6N;C57BL/6NTac	B6	5	A
MEQF20.2e	Ninj2:Hom	Homozygous	Male	2012-10-05	Ninj2	2012-12-03	270	8w 3d	MEQF	C57BL/6N;C57BL/6NTac	B6	5	A
MEQF20.2f	Ninj2:Hom	Homozygous	Male	2012-10-05	Ninj2	2012-12-03	130	8w 3d	MEQF	C57BL/6N;C57BL/6NTac	B6	5	A
MCQP80.1a	Cnot6:Het	Heterozygous	Male	2012-10-05	Cnot6	2012-12-03	195	8w 3d	MCQP	C57BL/6N;C57BL/6NTac	B6	5	A
MCQP80.1b	Cnot6:Het	Heterozygous	Male	2012-10-05	Cnot6	2012-12-03	140	8w 3d	MCQP	C57BL/6N;C57BL/6NTac	B6	5	A
MCQP80.1c	Cnot6:Het	Heterozygous	Male	2012-10-05	Cnot6	2012-12-03	210	8w 3d	MCQP	C57BL/6N;C57BL/6NTac	B6	5	A
MCQP81.1a	Cnot6:Het	Heterozygous	Male	2012-10-05	Cnot6	2012-12-03	236	8w 3d	MCQP	C57BL/6N;C57BL/6NTac	B6	5	A
MCQP81.1b	Cnot6:Het	Heterozygous	Male	2012-10-05	Cnot6	2012-12-03	190	8w 3d	MCQP	C57BL/6N;C57BL/6NTac	B6	5	A
MCQP82.1a	Cnot6:Het	Heterozygous	Male	2012-10-05	Cnot6	2012-12-03	290	8w 3d	MCQP	C57BL/6N;C57BL/6NTac	B6	5	A
MCQP82.1b	Cnot6:Het	Heterozygous	Male	2012-10-05	Cnot6	2012-12-03	145	8w 3d	MCQP	C57BL/6N;C57BL/6NTac	B6	5	A
MCQP82.1c	Cnot6:Het	Heterozygous	Male	2012-10-05	Cnot6	2012-12-03	200	8w 3d	MCQP	C57BL/6N;C57BL/6NTac	B6	5	A
MCQP84.1a	Cnot6:Het	Heterozygous	Male	2012-10-05	Cnot6	2012-12-03	190	8w 3d	MCQP	C57BL/6N;C57BL/6NTac	B6	5	A
MCQP84.1b	Cnot6:Het	Heterozygous	Male	2012-10-05	Cnot6	2012-12-03	150	8w 3d	MCQP	C57BL/6N;C57BL/6NTac	B6	5	A
MCQP84.1c	Cnot6:Het	Heterozygous	Male	2012-10-05	Cnot6	2012-12-03	140	8w 3d	MCQP	C57BL/6N;C57BL/6NTac	B6	5	A
MCQP84.1d	Cnot6:Het	Heterozygous	Male	2012-10-05	Cnot6	2012-12-03	135	8w 3d	MCQP	C57BL/6N;C57BL/6NTac	B6	5	A
MEHD21.2g	WT	Wildtype	Female	2012-10-08		2012-12-03	235	8w	MEHD	C57BL/6N;C57BL/6NTac	B6	5	B
MEHD21.2i	WT	Wildtype	Female	2012-10-08		2012-12-03	200	8w	MEHD	C57BL/6N;C57BL/6NTac	B6	5	B
MEHD21.2j	WT	Wildtype	Female	2012-10-08		2012-12-03	200	8w	MEHD	C57BL/6N;C57BL/6NTac	B6	5	B
MEAV24.3f	WT	Wildtype	Female	2012-10-05		2012-12-03	120	8w 3d	MEAV	C57BL/6N;C57BL/6NTac	B6	5	B
MEAV24.3g	WT	Wildtype	Female	2012-10-05		2012-12-03	180	8w 3d	MEAV	C57BL/6N;C57BL/6NTac	B6	5	B
MEAV25.2b	WT	Wildtype	Female	2012-09-29		2012-12-03	140	9w 2d	MEAV	C57BL/6N;C57BL/6NTac	B6	5	B
MEAV30.2e	WT	Wildtype	Female	2012-10-06		2012-12-03	160	8w 2d	MEAV	C57BL/6N;C57BL/6NTac	B6	5	B
MEQF19.2g	Ninj2:Hom	Homozygous	Female	2012-09-22	Ninj2	2012-12-03	170	10w 2d	MEQF	C57BL/6N;C57BL/6NTac	B6	5	B
MEQF20.2g	Ninj2:Hom	Homozygous	Female	2012-10-05	Ninj2	2012-12-03	180	8w 3d	MEQF	C57BL/6N;C57BL/6NTac	B6	5	B
MEQF20.2i	Ninj2:Hom	Homozygous	Female	2012-10-05	Ninj2	2012-12-03	230	8w 3d	MEQF	C57BL/6N;C57BL/6NTac	B6	5	B
RALG1.1a	WT	Wildtype	Male	2012-10-07		2012-12-10	120	9w 1d	RALG	C57BL/6N;C57BL/6NTac	B6	5	A
RALG2.1a	WT	Wildtype	Male	2012-10-15		2012-12-10	85	8w	RALG	C57BL/6N;C57BL/6NTac	B6	5	A
RALG2.1b	WT	Wildtype	Male	2012-10-15		2012-12-10	154	8w	RALG	C57BL/6N;C57BL/6NTac	B6	5	A
RALG2.1c	WT	Wildtype	Male	2012-10-15		2012-12-10	152	8w	RALG	C57BL/6N;C57BL/6NTac	B6	5	A
RALG2.1d	WT	Wildtype	Male	2012-10-15		2012-12-10	100	8w	RALG	C57BL/6N;C57BL/6NTac	B6	5	A
MDJL41.4a	WT	Wildtype	Male	2012-10-15		2012-12-10	136	8w	MDJL	C57BL/6N;C57BL/6NTac	B6	5	A
MDJL43.4b	WT	Wildtype	Male	2012-10-14		2012-12-10	180	8w 1d	MDJL	C57BL/6N;C57BL/6NTac	B6	5	A
RALG1.1b	Ralgapb:Het	Heterozygous	Male	2012-10-07	Ralgapb	2012-12-10	135	9w 1d	RALG	C57BL/6N;C57BL/6NTac	B6	5	A
RALG1.1c	Ralgapb:Het	Heterozygous	Male	2012-10-07	Ralgapb	2012-12-10	180	9w 1d	RALG	C57BL/6N;C57BL/6NTac	B6	5	A
RALG1.1d	Ralgapb:Het	Heterozygous	Male	2012-10-07	Ralgapb	2012-12-10	196	9w 1d	RALG	C57BL/6N;C57BL/6NTac	B6	5	A
IRFS4.1b	WT	Wildtype	Female	2012-10-12		2012-12-10	150	8w 3d	IRFS	C57BL/6N;C57BL/6NTac	B6	5	B
IRFS4.1c	WT	Wildtype	Female	2012-10-12		2012-12-10	185	8w 3d	IRFS	C57BL/6N;C57BL/6NTac	B6	5	B
IRFS4.1d	WT	Wildtype	Female	2012-10-12		2012-12-10	160	8w 3d	IRFS	C57BL/6N;C57BL/6NTac	B6	5	B
IRFS4.1e	WT	Wildtype	Female	2012-10-12		2012-12-10	150	8w 3d	IRFS	C57BL/6N;C57BL/6NTac	B6	5	B
RALG1.1e	WT	Wildtype	Female	2012-10-07		2012-12-10	110	9w 1d	RALG	C57BL/6N;C57BL/6NTac	B6	5	B
RALG1.1h	WT	Wildtype	Female	2012-10-07		2012-12-10	105	9w 1d	RALG	C57BL/6N;C57BL/6NTac	B6	5	B
RALG1.1i	WT	Wildtype	Female	2012-10-07		2012-12-10	210	9w 1d	RALG	C57BL/6N;C57BL/6NTac	B6	5	B
RALG1.1f	Ralgapb:Het	Heterozygous	Female	2012-10-07	Ralgapb	2012-12-10	260	9w 1d	RALG	C57BL/6N;C57BL/6NTac	B6	5	B
RALG2.1e	Ralgapb:Het	Heterozygous	Female	2012-10-15	Ralgapb	2012-12-10	120	8w	RALG	C57BL/6N;C57BL/6NTac	B6	5	B
RALG2.1f	Ralgapb:Het	Heterozygous	Female	2012-10-15	Ralgapb	2012-12-10	240	8w	RALG	C57BL/6N;C57BL/6NTac	B6	5	B
RALG2.1g	Ralgapb:Het	Heterozygous	Female	2012-10-15	Ralgapb	2012-12-10	140	8w	RALG	C57BL/6N;C57BL/6NTac	B6	5	B
MFEN7.3a	WT	Wildtype	Male	2012-10-19		2012-12-17	280	8w 3d	MFEN	C57BL/6N;C57BL/6NTac	B6	5	A
MFEN7.3b	WT	Wildtype	Male	2012-10-19		2012-12-17	145	8w 3d	MFEN	C57BL/6N;C57BL/6NTac	B6	5	A
MFEN7.3d	WT	Wildtype	Male	2012-10-19		2012-12-17	160	8w 3d	MFEN	C57BL/6N;C57BL/6NTac	B6	5	A
MEMY26.2d	WT	Wildtype	Male	2012-10-19		2012-12-17	150	8w 3d	MEMY	C57BL/6N;C57BL/6NTac	B6	5	A
MEMY26.2e	WT	Wildtype	Male	2012-10-19		2012-12-17	200	8w 3d	MEMY	C57BL/6N;C57BL/6NTac	B6	5	A
MEMY26.2f	WT	Wildtype	Male	2012-10-19		2012-12-17	160	8w 3d	MEMY	C57BL/6N;C57BL/6NTac	B6	5	A
CBLT2136.3a	WT	Wildtype	Male	2012-10-22		2012-12-17	165	8w	CBLT	C57BL/6NTac	B6	5	A
CBLT2136.3b	WT	Wildtype	Male	2012-10-22		2012-12-17	165	8w	CBLT	C57BL/6NTac	B6	5	A
CBLT2136.3c	WT	Wildtype	Male	2012-10-22		2012-12-17	155	8w	CBLT	C57BL/6NTac	B6	5	A
CBLT2136.3d	WT	Wildtype	Male	2012-10-22		2012-12-17	120	8w	CBLT	C57BL/6NTac	B6	5	A
CBLT2136.3e	WT	Wildtype	Male	2012-10-22		2012-12-17	126	8w	CBLT	C57BL/6NTac	B6	5	A
CBLT2136.3f	WT	Wildtype	Male	2012-10-22		2012-12-17	230	8w	CBLT	C57BL/6NTac	B6	5	A
MEBN37.2b	Irf7:Hom	Homozygous	Male	2012-10-22	Irf7	2012-12-17	250	8w	MEBN	C57BL/6N;C57BL/6NTac	B6	5	A
MEBN37.2c	Irf7:Hom	Homozygous	Male	2012-10-22	Irf7	2012-12-17	245	8w	MEBN	C57BL/6N;C57BL/6NTac	B6	5	A
MEBN37.2d	Irf7:Hom	Homozygous	Male	2012-10-22	Irf7	2012-12-17	260	8w	MEBN	C57BL/6N;C57BL/6NTac	B6	5	A
MEBN40.2c	Irf7:Hom	Homozygous	Male	2012-10-24	Irf7	2012-12-17	250	7w 5d	MEBN	C57BL/6N;C57BL/6NTac	B6	5	A
MEGQ21.2b	Tceal5:Hom	Homozygous	Male	2012-10-24	Tceal5	2012-12-17	145	7w 5d	MEGQ	C57BL/6N;C57BL/6NTac	B6	5	A
MEGQ21.2c	Tceal5:Hom	Homozygous	Male	2012-10-24	Tceal5	2012-12-17	185	7w 5d	MEGQ	C57BL/6N;C57BL/6NTac	B6	5	A
MEGQ21.2d	Tceal5:Hom	Homozygous	Male	2012-10-24	Tceal5	2012-12-17	236	7w 5d	MEGQ	C57BL/6N;C57BL/6NTac	B6	5	A
MEGQ22.2a	Tceal5:Hom	Homozygous	Male	2012-10-25	Tceal5	2012-12-17	150	7w 4d	MEGQ	C57BL/6N;C57BL/6NTac	B6	5	A
MEGQ22.2b	Tceal5:Hom	Homozygous	Male	2012-10-25	Tceal5	2012-12-17	190	7w 4d	MEGQ	C57BL/6N;C57BL/6NTac	B6	5	A
MEGQ22.2c	Tceal5:Hom	Homozygous	Male	2012-10-25	Tceal5	2012-12-17	235	7w 4d	MEGQ	C57BL/6N;C57BL/6NTac	B6	5	A
MDJL41.4c	WT	Wildtype	Female	2012-10-15		2012-12-17	145	9w	MDJL	C57BL/6N;C57BL/6NTac	B6	5	B
MDJL41.4d	WT	Wildtype	Female	2012-10-15		2012-12-17	245	9w	MDJL	C57BL/6N;C57BL/6NTac	B6	5	B
MDJL41.4f	WT	Wildtype	Female	2012-10-15		2012-12-17	245	9w	MDJL	C57BL/6N;C57BL/6NTac	B6	5	B
MDJL43.4c	WT	Wildtype	Female	2012-10-14		2012-12-17	115	9w 1d	MDJL	C57BL/6N;C57BL/6NTac	B6	5	B
MDJL43.4e	WT	Wildtype	Female	2012-10-14		2012-12-17	80	9w 1d	MDJL	C57BL/6N;C57BL/6NTac	B6	5	B
MDJL43.4f	WT	Wildtype	Female	2012-10-14		2012-12-17	100	9w 1d	MDJL	C57BL/6N;C57BL/6NTac	B6	5	B
CBLT2340.2f	WT	Wildtype	Female	2012-10-16		2012-12-17	143	8w 6d	CBLT	C57BL/6NTac	B6	5	B
CBLT2340.2g	WT	Wildtype	Female	2012-10-16		2012-12-17	235	8w 6d	CBLT	C57BL/6NTac	B6	5	B
CBLT2340.2h	WT	Wildtype	Female	2012-10-16		2012-12-17	160	8w 6d	CBLT	C57BL/6NTac	B6	5	B
CBLT2340.2i	WT	Wildtype	Female	2012-10-16		2012-12-17	100	8w 6d	CBLT	C57BL/6NTac	B6	5	B
CBLT2347.2c	WT	Wildtype	Female	2012-10-19		2012-12-17	140	8w 3d	CBLT	C57BL/6NTac	B6	5	B
CBLT2347.2d	WT	Wildtype	Female	2012-10-19		2012-12-17	160	8w 3d	CBLT	C57BL/6NTac	B6	5	B
MEBN37.2e	Irf7:Hom	Homozygous	Female	2012-10-22	Irf7	2012-12-17	410	8w	MEBN	C57BL/6N;C57BL/6NTac	B6	5	B
MEBN37.2f	Irf7:Hom	Homozygous	Female	2012-10-22	Irf7	2012-12-17	320	8w	MEBN	C57BL/6N;C57BL/6NTac	B6	5	B
MEBN37.2g	Irf7:Hom	Homozygous	Female	2012-10-22	Irf7	2012-12-17	375	8w	MEBN	C57BL/6N;C57BL/6NTac	B6	5	B
MEBN37.2h	Irf7:Hom	Homozygous	Female	2012-10-22	Irf7	2012-12-17	120	8w	MEBN	C57BL/6N;C57BL/6NTac	B6	5	B
MEBN37.2i	Irf7:Hom	Homozygous	Female	2012-10-22	Irf7	2012-12-17	160	8w	MEBN	C57BL/6N;C57BL/6NTac	B6	5	B
MEBN37.2j	Irf7:Hom	Homozygous	Female	2012-10-22	Irf7	2012-12-17	260	8w	MEBN	C57BL/6N;C57BL/6NTac	B6	5	B
MEBN37.2k	Irf7:Hom	Homozygous	Female	2012-10-22	Irf7	2012-12-17	270	8w	MEBN	C57BL/6N;C57BL/6NTac	B6	5	B
MEBN40.2d	Irf7:Hom	Homozygous	Female	2012-10-24	Irf7	2012-12-17	320	7w 5d	MEBN	C57BL/6N;C57BL/6NTac	B6	5	B
MEBN40.2f	Irf7:Hom	Homozygous	Female	2012-10-24	Irf7	2012-12-17	360	7w 5d	MEBN	C57BL/6N;C57BL/6NTac	B6	5	B
MEGQ20.2g	Tceal5:Hom	Homozygous	Female	2012-10-15	Tceal5	2012-12-17	200	9w	MEGQ	C57BL/6N;C57BL/6NTac	B6	5	B
MEGQ21.2e	Tceal5:Hom	Homozygous	Female	2012-10-24	Tceal5	2012-12-17	250	7w 5d	MEGQ	C57BL/6N;C57BL/6NTac	B6	5	B
MEGQ21.2f	Tceal5:Hom	Homozygous	Female	2012-10-24	Tceal5	2012-12-17	210	7w 5d	MEGQ	C57BL/6N;C57BL/6NTac	B6	5	B
MEGQ21.2g	Tceal5:Hom	Homozygous	Female	2012-10-24	Tceal5	2012-12-17	215	7w 5d	MEGQ	C57BL/6N;C57BL/6NTac	B6	5	B
MEGQ21.2h	Tceal5:Hom	Homozygous	Female	2012-10-24	Tceal5	2012-12-17	290	7w 5d	MEGQ	C57BL/6N;C57BL/6NTac	B6	5	B
MEJH27.3b	WT	Wildtype	Male	2012-10-23		2012-12-17	230	7w 6d	MEJH	C57BL/6N;C57BL/6NTac	B6	5	C
MEJH28.2a	WT	Wildtype	Male	2012-10-25		2012-12-17	240	7w 4d	MEJH	C57BL/6N;C57BL/6NTac	B6	5	C
MEJH28.2b	WT	Wildtype	Male	2012-10-25		2012-12-17	130	7w 4d	MEJH	C57BL/6N;C57BL/6NTac	B6	5	C
MEMW17.2a	WT	Wildtype	Male	2012-10-23		2012-12-17	210	7w 6d	MEMW	C57BL/6N;C57BL/6NTac	B6	5	C
MEMW17.2b	WT	Wildtype	Male	2012-10-23		2012-12-17	160	7w 6d	MEMW	C57BL/6N;C57BL/6NTac	B6	5	C
MEMW17.2c	WT	Wildtype	Male	2012-10-23		2012-12-17	245	7w 6d	MEMW	C57BL/6N;C57BL/6NTac	B6	5	C
CBLT2058.4a	WT	Wildtype	Male	2012-10-27		2012-12-17	190	7w 2d	CBLT	C57BL/6NTac	B6	5	C
CBLT2058.4b	WT	Wildtype	Male	2012-10-27		2012-12-17	360	7w 2d	CBLT	C57BL/6NTac	B6	5	C
CBLT2058.4c	WT	Wildtype	Male	2012-10-27		2012-12-17	140	7w 2d	CBLT	C57BL/6NTac	B6	5	C
CBLT2058.4d	WT	Wildtype	Male	2012-10-27		2012-12-17	165	7w 2d	CBLT	C57BL/6NTac	B6	5	C
CBLT2058.4e	WT	Wildtype	Male	2012-10-27		2012-12-17	165	7w 2d	CBLT	C57BL/6NTac	B6	5	C
CBLT2058.4f	WT	Wildtype	Male	2012-10-27		2012-12-17		7w 2d	CBLT	C57BL/6NTac	B6	5	C	Excluded (count <30 so presumed failed dosing)
MEKD28.2d	Tatdn3:Hom	Homozygous	Male	2012-10-21	Tatdn3	2012-12-17	85	8w 1d	MEKD	C57BL/6N;C57BL/6NTac	B6	5	C
MEKD28.2f	Tatdn3:Hom	Homozygous	Male	2012-10-21	Tatdn3	2012-12-17	207	8w 1d	MEKD	C57BL/6N;C57BL/6NTac	B6	5	C
MEKD33.1b	Tatdn3:Hom	Homozygous	Male	2012-10-16	Tatdn3	2012-12-17	132	8w 6d	MEKD	C57BL/6N;C57BL/6NTac	B6	5	C
MEKD34.1a	Tatdn3:Hom	Homozygous	Male	2012-10-16	Tatdn3	2012-12-17	130	8w 6d	MEKD	C57BL/6N;C57BL/6NTac	B6	5	C
MEKD34.1e	Tatdn3:Hom	Homozygous	Male	2012-10-16	Tatdn3	2012-12-17	200	8w 6d	MEKD	C57BL/6N;C57BL/6NTac	B6	5	C
MEKD34.1f	Tatdn3:Hom	Homozygous	Male	2012-10-16	Tatdn3	2012-12-17	225	8w 6d	MEKD	C57BL/6N;C57BL/6NTac	B6	5	C
MCHV68.2a	Rcor2:Het	Heterozygous	Male	2012-10-14	Rcor2	2012-12-17	135	9w 1d	MCHV	C57BL/6N;C57BL/6NTac	B6	5	C
MCHV68.2b	Rcor2:Het	Heterozygous	Male	2012-10-14	Rcor2	2012-12-17	240	9w 1d	MCHV	C57BL/6N;C57BL/6NTac	B6	5	C
MCHV68.2c	Rcor2:Het	Heterozygous	Male	2012-10-14	Rcor2	2012-12-17	200	9w 1d	MCHV	C57BL/6N;C57BL/6NTac	B6	5	C
MCHV74.1b	Rcor2:Het	Heterozygous	Male	2012-10-10	Rcor2	2012-12-17	215	9w 5d	MCHV	C57BL/6N;C57BL/6NTac	B6	5	C
MCHV74.1c	Rcor2:Het	Heterozygous	Male	2012-10-10	Rcor2	2012-12-17	200	9w 5d	MCHV	C57BL/6N;C57BL/6NTac	B6	5	C
MCHV76.1a	Rcor2:Het	Heterozygous	Male	2012-10-22	Rcor2	2012-12-17	170	8w	MCHV	C57BL/6N;C57BL/6NTac	B6	5	C
MCHV76.1b	Rcor2:Het	Heterozygous	Male	2012-10-22	Rcor2	2012-12-17	135	8w	MCHV	C57BL/6N;C57BL/6NTac	B6	5	C
MEDL27.3a	WT	Wildtype	Male	2012-10-31		2012-12-24	260	7w 5d	MEDL	C57BL/6N;C57BL/6NTac	B6	5	A
MEDL27.3b	WT	Wildtype	Male	2012-10-31		2012-12-24	180	7w 5d	MEDL	C57BL/6N;C57BL/6NTac	B6	5	A
MEDL27.3c	WT	Wildtype	Male	2012-10-31		2012-12-24	250	7w 5d	MEDL	C57BL/6N;C57BL/6NTac	B6	5	A
MCZY63.1a	WT	Wildtype	Male	2012-11-02		2012-12-24	300	7w 3d	MCZY	C57BL/6N;C57BL/6NTac	B6	5	A
MCZY63.1b	WT	Wildtype	Male	2012-11-02		2012-12-24	175	7w 3d	MCZY	C57BL/6N;C57BL/6NTac	B6	5	A
MCZY63.1c	WT	Wildtype	Male	2012-11-02		2012-12-24	164	7w 3d	MCZY	C57BL/6N;C57BL/6NTac	B6	5	A
MECV27.2a	Apool:Hom	Homozygous	Male	2012-10-26	Apool	2012-12-24	56	8w 3d	MECV	C57BL/6N;C57BL/6NTac	B6	5	A
MECV27.2b	Apool:Hom	Homozygous	Male	2012-10-26	Apool	2012-12-24	150	8w 3d	MECV	C57BL/6N;C57BL/6NTac	B6	5	A
MECV32.2a	Apool:Hom	Homozygous	Male	2012-10-28	Apool	2012-12-24	70	8w 1d	MECV	C57BL/6N;C57BL/6NTac	B6	5	A
MECV33.1a	Apool:Hom	Homozygous	Male	2012-10-25	Apool	2012-12-24	90	8w 4d	MECV	C57BL/6N;C57BL/6NTac	B6	5	A
MERM29.2a	Dcdc2c:Hom	Homozygous	Male	2012-10-29	Dcdc2c	2012-12-24	200	8w	MERM	C57BL/6N;C57BL/6NTac	B6	5	A
MERM29.2b	Dcdc2c:Hom	Homozygous	Male	2012-10-29	Dcdc2c	2012-12-24	110	8w	MERM	C57BL/6N;C57BL/6NTac	B6	5	A
MERM29.2c	Dcdc2c:Hom	Homozygous	Male	2012-10-29	Dcdc2c	2012-12-24	190	8w	MERM	C57BL/6N;C57BL/6NTac	B6	5	A
MEKM29.4b	Exoc3l2:Hom	Homozygous	Male	2012-10-31	Exoc3l2	2012-12-24	75	7w 5d	MEKM	C57BL/6N;C57BL/6NTac	B6	5	A
MEKM29.4d	Exoc3l2:Hom	Homozygous	Male	2012-10-31	Exoc3l2	2012-12-24	80	7w 5d	MEKM	C57BL/6N;C57BL/6NTac	B6	5	A
MEKM31.3a	Exoc3l2:Hom	Homozygous	Male	2012-10-31	Exoc3l2	2012-12-24	185	7w 5d	MEKM	C57BL/6N;C57BL/6NTac	B6	5	A
SPNB1.1a	Sptbn1:Het	Heterozygous	Male	2012-10-08	Sptbn1	2012-12-24	125	11w	SPNB	C57BL/6Brd-Tyr<c-Brd>;C57BL/6N	B6	5	A
SPNB1.1b	Sptbn1:Het	Heterozygous	Male	2012-10-08	Sptbn1	2012-12-24	65	11w	SPNB	C57BL/6Brd-Tyr<c-Brd>;C57BL/6N	B6	5	A
SPNB2.1a	Sptbn1:Het	Heterozygous	Male	2012-11-03	Sptbn1	2012-12-24	155	7w 2d	SPNB	C57BL/6Brd-Tyr<c-Brd>;C57BL/6N	B6	5	A
SPNB2.1b	Sptbn1:Het	Heterozygous	Male	2012-11-03	Sptbn1	2012-12-24	130	7w 2d	SPNB	C57BL/6Brd-Tyr<c-Brd>;C57BL/6N	B6	5	A
MEVA17.2c	WT	Wildtype	Female	2012-10-22		2012-12-24	200	9w	MEVA	C57BL/6N;C57BL/6NTac	B6	5	B
MEVA17.2f	WT	Wildtype	Female	2012-10-22		2012-12-24	165	9w	MEVA	C57BL/6N;C57BL/6NTac	B6	5	B
MEVA17.2g	WT	Wildtype	Female	2012-10-22		2012-12-24	200	9w	MEVA	C57BL/6N;C57BL/6NTac	B6	5	B
MFBN15.1d	WT	Wildtype	Female	2012-10-29		2012-12-24	220	8w	MFBN	C57BL/6N;C57BL/6NTac	B6	5	B
MFBN15.1f	WT	Wildtype	Female	2012-10-29		2012-12-24	220	8w	MFBN	C57BL/6N;C57BL/6NTac	B6	5	B
MFBN15.1g	WT	Wildtype	Female	2012-10-29		2012-12-24	275	8w	MFBN	C57BL/6N;C57BL/6NTac	B6	5	B
MEHJ24.2a	WT	Wildtype	Female	2012-10-30		2012-12-24	240	7w 6d	MEHJ	C57BL/6N;C57BL/6NTac	B6	5	B
MEHJ24.2b	WT	Wildtype	Female	2012-10-30		2012-12-24	154	7w 6d	MEHJ	C57BL/6N;C57BL/6NTac	B6	5	B
MEHJ24.2c	WT	Wildtype	Female	2012-10-30		2012-12-24	165	7w 6d	MEHJ	C57BL/6N;C57BL/6NTac	B6	5	B
MEZP20.2c	WT	Wildtype	Female	2012-10-23		2012-12-24	180	8w 6d	MEZP	C57BL/6N;C57BL/6NTac	B6	5	B
MEZP20.2e	WT	Wildtype	Female	2012-10-23		2012-12-24	130	8w 6d	MEZP	C57BL/6N;C57BL/6NTac	B6	5	B
MEZP20.2f	WT	Wildtype	Female	2012-10-23		2012-12-24	225	8w 6d	MEZP	C57BL/6N;C57BL/6NTac	B6	5	B
MECV27.2c	Apool:Hom	Homozygous	Female	2012-10-26	Apool	2012-12-24	120	8w 3d	MECV	C57BL/6N;C57BL/6NTac	B6	5	B
MECV27.2d	Apool:Hom	Homozygous	Female	2012-10-26	Apool	2012-12-24	155	8w 3d	MECV	C57BL/6N;C57BL/6NTac	B6	5	B
MECV32.2e	Apool:Hom	Homozygous	Female	2012-10-28	Apool	2012-12-24	212	8w 1d	MECV	C57BL/6N;C57BL/6NTac	B6	5	B
MECV32.2f	Apool:Hom	Homozygous	Female	2012-10-28	Apool	2012-12-24	175	8w 1d	MECV	C57BL/6N;C57BL/6NTac	B6	5	B
MECV33.1d	Apool:Hom	Homozygous	Female	2012-10-25	Apool	2012-12-24	190	8w 4d	MECV	C57BL/6N;C57BL/6NTac	B6	5	B
MERM29.2d	Dcdc2c:Hom	Homozygous	Female	2012-10-29	Dcdc2c	2012-12-24	230	8w	MERM	C57BL/6N;C57BL/6NTac	B6	5	B
MERM29.2e	Dcdc2c:Hom	Homozygous	Female	2012-10-29	Dcdc2c	2012-12-24	215	8w	MERM	C57BL/6N;C57BL/6NTac	B6	5	B
MERM29.2f	Dcdc2c:Hom	Homozygous	Female	2012-10-29	Dcdc2c	2012-12-24	230	8w	MERM	C57BL/6N;C57BL/6NTac	B6	5	B
MERM29.2g	Dcdc2c:Hom	Homozygous	Female	2012-10-29	Dcdc2c	2012-12-24	280	8w	MERM	C57BL/6N;C57BL/6NTac	B6	5	B
MEKM29.4h	Exoc3l2:Hom	Homozygous	Female	2012-10-31	Exoc3l2	2012-12-24	135	7w 5d	MEKM	C57BL/6N;C57BL/6NTac	B6	5	B
MEKM31.3c	Exoc3l2:Hom	Homozygous	Female	2012-10-31	Exoc3l2	2012-12-24	186	7w 5d	MEKM	C57BL/6N;C57BL/6NTac	B6	5	B
MEKD28.2h	Tatdn3:Hom	Homozygous	Female	2012-10-21	Tatdn3	2012-12-24	230	9w 1d	MEKD	C57BL/6N;C57BL/6NTac	B6	5	B
MEKD28.2i	Tatdn3:Hom	Homozygous	Female	2012-10-21	Tatdn3	2012-12-24	220	9w 1d	MEKD	C57BL/6N;C57BL/6NTac	B6	5	B
MEKD31.2h	Tatdn3:Hom	Homozygous	Female	2012-10-14	Tatdn3	2012-12-24	260	10w 1d	MEKD	C57BL/6N;C57BL/6NTac	B6	5	B
MEKD33.1f	Tatdn3:Hom	Homozygous	Female	2012-10-16	Tatdn3	2012-12-24	200	9w 6d	MEKD	C57BL/6N;C57BL/6NTac	B6	5	B
MEKD34.1i	Tatdn3:Hom	Homozygous	Female	2012-10-16	Tatdn3	2012-12-24	150	9w 6d	MEKD	C57BL/6N;C57BL/6NTac	B6	5	B
MYZM10.1d	WT	Wildtype	Male	2012-11-17		2013-01-07	151	7w 2d	MYZM	C57BL/6Dnk;C57BL/6NTac	B6	5	A
MYZM3.2d	WT	Wildtype	Male	2012-10-27		2013-01-07	100	10w 2d	MYZM	C57BL/6Dnk;C57BL/6NTac	B6	5	A
MYZM3.2e	WT	Wildtype	Male	2012-10-27		2013-01-07	280	10w 2d	MYZM	C57BL/6Dnk;C57BL/6NTac	B6	5	A
MYZM4.1a	WT	Wildtype	Male	2012-11-06		2013-01-07	170	8w 6d	MYZM	C57BL/6Dnk;C57BL/6NTac	B6	5	A
NFK6.1e	WT	Wildtype	Male	2012-11-17		2013-01-07		7w 2d	NFK	C57BL/6Brd-Tyr<c-Brd>;C57BL/6Dnk;C57BL/6NTac	B6	5	A	Excluded (count <30 so presumed failed dosing)
NFK6.1f	WT	Wildtype	Male	2012-11-17		2013-01-07	215	7w 2d	NFK	C57BL/6Brd-Tyr<c-Brd>;C57BL/6Dnk;C57BL/6NTac	B6	5	A
NFK6.1h	WT	Wildtype	Male	2012-11-17		2013-01-07	124	7w 2d	NFK	C57BL/6Brd-Tyr<c-Brd>;C57BL/6Dnk;C57BL/6NTac	B6	5	A
MYZM10.1a	Mysm1:Het	Heterozygous	Male	2012-11-17	Mysm1	2013-01-07	57	7w 2d	MYZM	C57BL/6Dnk;C57BL/6NTac	B6	5	A
MYZM10.1b	Mysm1:Het	Heterozygous	Male	2012-11-17	Mysm1	2013-01-07	60	7w 2d	MYZM	C57BL/6Dnk;C57BL/6NTac	B6	5	A
MYZM10.1c	Mysm1:Het	Heterozygous	Male	2012-11-17	Mysm1	2013-01-07	95	7w 2d	MYZM	C57BL/6Dnk;C57BL/6NTac	B6	5	A
MYZM10.1e	Mysm1:Het	Heterozygous	Male	2012-11-17	Mysm1	2013-01-07	270	7w 2d	MYZM	C57BL/6Dnk;C57BL/6NTac	B6	5	A
MYZM3.2a	Mysm1:Het	Heterozygous	Male	2012-10-27	Mysm1	2013-01-07	110	10w 2d	MYZM	C57BL/6Dnk;C57BL/6NTac	B6	5	A
MYZM3.2b	Mysm1:Het	Heterozygous	Male	2012-10-27	Mysm1	2013-01-07	205	10w 2d	MYZM	C57BL/6Dnk;C57BL/6NTac	B6	5	A
MYZM3.2c	Mysm1:Het	Heterozygous	Male	2012-10-27	Mysm1	2013-01-07	105	10w 2d	MYZM	C57BL/6Dnk;C57BL/6NTac	B6	5	A
MYZM4.1b	Mysm1:Het	Heterozygous	Male	2012-11-06	Mysm1	2013-01-07	250	8w 6d	MYZM	C57BL/6Dnk;C57BL/6NTac	B6	5	A
MYZM4.1c	Mysm1:Het	Heterozygous	Male	2012-11-06	Mysm1	2013-01-07	190	8w 6d	MYZM	C57BL/6Dnk;C57BL/6NTac	B6	5	A
MYZM5.1b	Mysm1:Het	Heterozygous	Male	2012-11-10	Mysm1	2013-01-07	120	8w 2d	MYZM	C57BL/6Dnk;C57BL/6NTac	B6	5	A
MYZM3.2i	WT	Wildtype	Female	2012-10-27		2013-01-07	300	10w 2d	MYZM	C57BL/6Dnk;C57BL/6NTac	B6	5	B
NFK5.1d	WT	Wildtype	Female	2012-11-13		2013-01-07	205	7w 6d	NFK	C57BL/6Brd-Tyr<c-Brd>;C57BL/6Dnk;C57BL/6NTac	B6	5	B
NFK5.1e	WT	Wildtype	Female	2012-11-13		2013-01-07	200	7w 6d	NFK	C57BL/6Brd-Tyr<c-Brd>;C57BL/6Dnk;C57BL/6NTac	B6	5	B
NFK5.1f	WT	Wildtype	Female	2012-11-13		2013-01-07	190	7w 6d	NFK	C57BL/6Brd-Tyr<c-Brd>;C57BL/6Dnk;C57BL/6NTac	B6	5	B
MYZM10.1f	Mysm1:Het	Heterozygous	Female	2012-11-17	Mysm1	2013-01-07	310	7w 2d	MYZM	C57BL/6Dnk;C57BL/6NTac	B6	5	B
MYZM10.1g	Mysm1:Het	Heterozygous	Female	2012-11-17	Mysm1	2013-01-07	225	7w 2d	MYZM	C57BL/6Dnk;C57BL/6NTac	B6	5	B
MYZM10.1h	Mysm1:Het	Heterozygous	Female	2012-11-17	Mysm1	2013-01-07	205	7w 2d	MYZM	C57BL/6Dnk;C57BL/6NTac	B6	5	B
MYZM5.1e	Mysm1:Het	Heterozygous	Female	2012-11-10	Mysm1	2013-01-07	195	8w 2d	MYZM	C57BL/6Dnk;C57BL/6NTac	B6	5	B
MYZM8.1f	Mysm1:Het	Heterozygous	Female	2012-11-07	Mysm1	2013-01-07	140	8w 5d	MYZM	C57BL/6Dnk;C57BL/6NTac	B6	5	B
MYZM8.1g	Mysm1:Het	Heterozygous	Female	2012-11-07	Mysm1	2013-01-07	170	8w 5d	MYZM	C57BL/6Dnk;C57BL/6NTac	B6	5	B
BRDE12.2a	WT	Wildtype	Male	2012-11-16		2013-01-08	113	7w 4d	BRDE	C57BL/6Brd-Tyr<c-Brd>;C57BL/6Dnk;C57BL/6NTac	B6	5	A
BRDE12.2b	WT	Wildtype	Male	2012-11-16		2013-01-08	130	7w 4d	BRDE	C57BL/6Brd-Tyr<c-Brd>;C57BL/6Dnk;C57BL/6NTac	B6	5	A
BRDE12.2c	WT	Wildtype	Male	2012-11-16		2013-01-08	150	7w 4d	BRDE	C57BL/6Brd-Tyr<c-Brd>;C57BL/6Dnk;C57BL/6NTac	B6	5	A
BRDE12.2d	WT	Wildtype	Male	2012-11-16		2013-01-08	140	7w 4d	BRDE	C57BL/6Brd-Tyr<c-Brd>;C57BL/6Dnk;C57BL/6NTac	B6	5	A
BRDE13.1a	WT	Wildtype	Male	2012-10-23		2013-01-08	52	11w	BRDE	C57BL/6Brd-Tyr<c-Brd>;C57BL/6Dnk;C57BL/6NTac	B6	5	A
BRDE13.1b	WT	Wildtype	Male	2012-10-23		2013-01-08	90	11w	BRDE	C57BL/6Brd-Tyr<c-Brd>;C57BL/6Dnk;C57BL/6NTac	B6	5	A
BRDE13.1c	WT	Wildtype	Male	2012-10-23		2013-01-08	72	11w	BRDE	C57BL/6Brd-Tyr<c-Brd>;C57BL/6Dnk;C57BL/6NTac	B6	5	A
BRDE13.2c	WT	Wildtype	Male	2012-11-17		2013-01-08	150	7w 3d	BRDE	C57BL/6Brd-Tyr<c-Brd>;C57BL/6Dnk;C57BL/6NTac	B6	5	A
NFK6.1b	WT	Wildtype	Male	2012-11-17		2013-01-08	80	7w 3d	NFK	C57BL/6Brd-Tyr<c-Brd>;C57BL/6Dnk;C57BL/6NTac	B6	5	A
NFK6.1c	WT	Wildtype	Male	2012-11-17		2013-01-08	63	7w 3d	NFK	C57BL/6Brd-Tyr<c-Brd>;C57BL/6Dnk;C57BL/6NTac	B6	5	A
NFK6.1d	WT	Wildtype	Male	2012-11-17		2013-01-08	110	7w 3d	NFK	C57BL/6Brd-Tyr<c-Brd>;C57BL/6Dnk;C57BL/6NTac	B6	5	A
BRDE12.1b	Brd8:Het	Heterozygous	Male	2012-10-24	Brd8	2013-01-08	105	10w 6d	BRDE	C57BL/6Brd-Tyr<c-Brd>;C57BL/6Dnk;C57BL/6NTac	B6	5	A
BRDE13.1d	Brd8:Het	Heterozygous	Male	2012-10-23	Brd8	2013-01-08	93	11w	BRDE	C57BL/6Brd-Tyr<c-Brd>;C57BL/6Dnk;C57BL/6NTac	B6	5	A
BRDE13.2a	Brd8:Het	Heterozygous	Male	2012-11-17	Brd8	2013-01-08	130	7w 3d	BRDE	C57BL/6Brd-Tyr<c-Brd>;C57BL/6Dnk;C57BL/6NTac	B6	5	A
BRDE13.2b	Brd8:Het	Heterozygous	Male	2012-11-17	Brd8	2013-01-08	180	7w 3d	BRDE	C57BL/6Brd-Tyr<c-Brd>;C57BL/6Dnk;C57BL/6NTac	B6	5	A
BRDE13.2d	Brd8:Het	Heterozygous	Male	2012-11-17	Brd8	2013-01-08	144	7w 3d	BRDE	C57BL/6Brd-Tyr<c-Brd>;C57BL/6Dnk;C57BL/6NTac	B6	5	A
BRDE13.2e	Brd8:Het	Heterozygous	Male	2012-11-17	Brd8	2013-01-08	115	7w 3d	BRDE	C57BL/6Brd-Tyr<c-Brd>;C57BL/6Dnk;C57BL/6NTac	B6	5	A
BRDE13.2f	Brd8:Het	Heterozygous	Male	2012-11-17	Brd8	2013-01-08	140	7w 3d	BRDE	C57BL/6Brd-Tyr<c-Brd>;C57BL/6Dnk;C57BL/6NTac	B6	5	A
CYFP8.2d	WT	Wildtype	Female	2012-11-14		2013-01-08	155	7w 6d	CYFP	C57BL/6N;C57BL/6NTac	B6	5	B
CYFP8.2f	WT	Wildtype	Female	2012-11-14		2013-01-08	163	7w 6d	CYFP	C57BL/6N;C57BL/6NTac	B6	5	B
CYFP8.2h	WT	Wildtype	Female	2012-11-14		2013-01-08	110	7w 6d	CYFP	C57BL/6N;C57BL/6NTac	B6	5	B
IRFS2.2f	WT	Wildtype	Female	2012-11-11		2013-01-08	142	8w 2d	IRFS	C57BL/6N;C57BL/6NTac	B6	5	B
IRFS2.2h	WT	Wildtype	Female	2012-11-11		2013-01-08	153	8w 2d	IRFS	C57BL/6N;C57BL/6NTac	B6	5	B
IRFS2.2i	WT	Wildtype	Female	2012-11-11		2013-01-08	160	8w 2d	IRFS	C57BL/6N;C57BL/6NTac	B6	5	B
MCKW72.1d	WT	Wildtype	Female	2012-11-12		2013-01-08	146	8w 1d	MCKW	C57BL/6N;C57BL/6NTac	B6	5	B
MCKW77.1e	WT	Wildtype	Female	2012-11-11		2013-01-08	150	8w 2d	MCKW	C57BL/6N;C57BL/6NTac	B6	5	B
MCKW77.1h	WT	Wildtype	Female	2012-11-11		2013-01-08	210	8w 2d	MCKW	C57BL/6N;C57BL/6NTac	B6	5	B
MCKW78.1c	WT	Wildtype	Female	2012-11-11		2013-01-08	122	8w 2d	MCKW	C57BL/6N;C57BL/6NTac	B6	5	B
MCKW79.1e	WT	Wildtype	Female	2012-11-11		2013-01-08	90	8w 2d	MCKW	C57BL/6N;C57BL/6NTac	B6	5	B
MCKW79.1f	WT	Wildtype	Female	2012-11-11		2013-01-08	164	8w 2d	MCKW	C57BL/6N;C57BL/6NTac	B6	5	B
MFEN13.1e	tm1:Hom	Homozygous	Female	2012-11-14	Endou	2013-01-08	92	7w 6d	MFEN	C57BL/6N;C57BL/6NTac	B6	5	B
MFEN13.1f	tm1:Hom	Homozygous	Female	2012-11-14	Endou	2013-01-08	67	7w 6d	MFEN	C57BL/6N;C57BL/6NTac	B6	5	B
MFEN13.1g	tm1:Hom	Homozygous	Female	2012-11-14	Endou	2013-01-08	226	7w 6d	MFEN	C57BL/6N;C57BL/6NTac	B6	5	B
MFEN14.1e	tm1:Hom	Homozygous	Female	2012-11-15	Endou	2013-01-08	160	7w 5d	MFEN	C57BL/6N;C57BL/6NTac	B6	5	B
MFEN15.1e	tm1:Hom	Homozygous	Female	2012-11-12	Endou	2013-01-08	180	8w 1d	MFEN	C57BL/6N;C57BL/6NTac	B6	5	B
MFEN16.1g	tm1:Hom	Homozygous	Female	2012-11-13	Endou	2013-01-08	150	8w	MFEN	C57BL/6N;C57BL/6NTac	B6	5	B
MFEN16.1h	tm1:Hom	Homozygous	Female	2012-11-13	Endou	2013-01-08	124	8w	MFEN	C57BL/6N;C57BL/6NTac	B6	5	B
MFEN16.1i	tm1:Hom	Homozygous	Female	2012-11-13	Endou	2013-01-08	190	8w	MFEN	C57BL/6N;C57BL/6NTac	B6	5	B
MEJY32.1d	Tomm20l:Hom	Homozygous	Female	2012-11-01	Tomm20l	2013-01-08	143	9w 5d	MEJY	C57BL/6N;C57BL/6NTac	B6	5	B
MEJY32.1e	Tomm20l:Hom	Homozygous	Female	2012-11-01	Tomm20l	2013-01-08	136	9w 5d	MEJY	C57BL/6N;C57BL/6NTac	B6	5	B
MEJY33.1h	Tomm20l:Hom	Homozygous	Female	2012-11-14	Tomm20l	2013-01-08	144	7w 6d	MEJY	C57BL/6N;C57BL/6NTac	B6	5	B
MEJY39.1g	Tomm20l:Hom	Homozygous	Female	2012-11-13	Tomm20l	2013-01-08	205	8w	MEJY	C57BL/6N;C57BL/6NTac	B6	5	B
MEJY39.1h	Tomm20l:Hom	Homozygous	Female	2012-11-13	Tomm20l	2013-01-08	280	8w	MEJY	C57BL/6N;C57BL/6NTac	B6	5	B
MEJY39.1i	Tomm20l:Hom	Homozygous	Female	2012-11-13	Tomm20l	2013-01-08	170	8w	MEJY	C57BL/6N;C57BL/6NTac	B6	5	B
MEJY40.1d	Tomm20l:Hom	Homozygous	Female	2012-11-15	Tomm20l	2013-01-08		7w 5d	MEJY	C57BL/6N;C57BL/6NTac	B6	5	B	Excluded (as difficulty dosing)
MEJY40.1f	Tomm20l:Hom	Homozygous	Female	2012-11-15	Tomm20l	2013-01-08	195	7w 5d	MEJY	C57BL/6N;C57BL/6NTac	B6	5	B
MEJY40.1g	Tomm20l:Hom	Homozygous	Female	2012-11-15	Tomm20l	2013-01-08	190	7w 5d	MEJY	C57BL/6N;C57BL/6NTac	B6	5	B
CBLT2345.2a	WT	Wildtype	Male	2012-10-30		2013-01-09		10w 1d	CBLT	C57BL/6NTac	B6	5	A	Excluded (count <30 so presumed failed dosing)
CBLT2345.2b	WT	Wildtype	Male	2012-10-30		2013-01-09	226	10w 1d	CBLT	C57BL/6NTac	B6	5	A
CBLT2345.2c	WT	Wildtype	Male	2012-10-30		2013-01-09	236	10w 1d	CBLT	C57BL/6NTac	B6	5	A
CBLT2345.2d	WT	Wildtype	Male	2012-10-30		2013-01-09	246	10w 1d	CBLT	C57BL/6NTac	B6	5	A
CBLT2345.2e	WT	Wildtype	Male	2012-10-30		2013-01-09	190	10w 1d	CBLT	C57BL/6NTac	B6	5	A
CBLT2345.2f	WT	Wildtype	Male	2012-10-30		2013-01-09	260	10w 1d	CBLT	C57BL/6NTac	B6	5	A
BCX1.1a	BC017643:Hom	Homozygous	Male	2012-11-15	BC017643	2013-01-09	280	7w 6d	BCX	C57BL/6N;C57BL/6NTac	B6	5	A
BCX1.1b	BC017643:Hom	Homozygous	Male	2012-11-15	BC017643	2013-01-09	174	7w 6d	BCX	C57BL/6N;C57BL/6NTac	B6	5	A
BCX1.1c	BC017643:Hom	Homozygous	Male	2012-11-15	BC017643	2013-01-09	190	7w 6d	BCX	C57BL/6N;C57BL/6NTac	B6	5	A
BCX3.1a	BC017643:Hom	Homozygous	Male	2012-11-16	BC017643	2013-01-09	90	7w 5d	BCX	C57BL/6N;C57BL/6NTac	B6	5	A
BCX3.1b	BC017643:Hom	Homozygous	Male	2012-11-16	BC017643	2013-01-09	129	7w 5d	BCX	C57BL/6N;C57BL/6NTac	B6	5	A
BCX3.1c	BC017643:Hom	Homozygous	Male	2012-11-16	BC017643	2013-01-09	164	7w 5d	BCX	C57BL/6N;C57BL/6NTac	B6	5	A
BCX3.1d	BC017643:Hom	Homozygous	Male	2012-11-16	BC017643	2013-01-09	157	7w 5d	BCX	C57BL/6N;C57BL/6NTac	B6	5	A
IDO1.2a	Ido1:Hom	Homozygous	Male	2012-11-10	Ido1	2013-01-09	130	8w 4d	IDO	C57BL/6N;C57BL/6NTac	B6	5	A
IDO1.2b	Ido1:Hom	Homozygous	Male	2012-11-10	Ido1	2013-01-09	170	8w 4d	IDO	C57BL/6N;C57BL/6NTac	B6	5	A
IDO1.2d	Ido1:Hom	Homozygous	Male	2012-11-10	Ido1	2013-01-09	190	8w 4d	IDO	C57BL/6N;C57BL/6NTac	B6	5	A
IDO2.1a	Ido1:Hom	Homozygous	Male	2012-11-06	Ido1	2013-01-09	206	9w 1d	IDO	C57BL/6N;C57BL/6NTac	B6	5	A
IDO2.1b	Ido1:Hom	Homozygous	Male	2012-11-06	Ido1	2013-01-09	154	9w 1d	IDO	C57BL/6N;C57BL/6NTac	B6	5	A
IDO2.1c	Ido1:Hom	Homozygous	Male	2012-11-06	Ido1	2013-01-09	220	9w 1d	IDO	C57BL/6N;C57BL/6NTac	B6	5	A
CYFP8.2i	WT	Wildtype	Female	2012-11-14		2013-01-09	190	8w	CYFP	C57BL/6N;C57BL/6NTac	B6	5	B
MEDH34.1c	WT	Wildtype	Female	2012-11-08		2013-01-09	165	8w 6d	MEDH	C57BL/6N;C57BL/6NTac	B6	5	B
MEDH34.1f	WT	Wildtype	Female	2012-11-08		2013-01-09	220	8w 6d	MEDH	C57BL/6N;C57BL/6NTac	B6	5	B
MEDH34.1g	WT	Wildtype	Female	2012-11-08		2013-01-09	250	8w 6d	MEDH	C57BL/6N;C57BL/6NTac	B6	5	B
MEDH41.1h	WT	Wildtype	Female	2012-11-06		2013-01-09	205	9w 1d	MEDH	C57BL/6N;C57BL/6NTac	B6	5	B
MEDH41.1i	WT	Wildtype	Female	2012-11-06		2013-01-09	200	9w 1d	MEDH	C57BL/6N;C57BL/6NTac	B6	5	B
MEDH41.1j	WT	Wildtype	Female	2012-11-06		2013-01-09	200	9w 1d	MEDH	C57BL/6N;C57BL/6NTac	B6	5	B
RALG7.2e	WT	Wildtype	Female	2012-11-17		2013-01-09	190	7w 4d	RALG	C57BL/6N;C57BL/6NTac	B6	5	B
RALG7.2f	WT	Wildtype	Female	2012-11-17		2013-01-09	190	7w 4d	RALG	C57BL/6N;C57BL/6NTac	B6	5	B
RALG7.2g	WT	Wildtype	Female	2012-11-17		2013-01-09		7w 4d	RALG	C57BL/6N;C57BL/6NTac	B6	5	B	Excluded (count <30 so presumed failed dosing)
BCX1.1e	BC017643:Hom	Homozygous	Female	2012-11-15	BC017643	2013-01-09	200	7w 6d	BCX	C57BL/6N;C57BL/6NTac	B6	5	B
BCX1.1f	BC017643:Hom	Homozygous	Female	2012-11-15	BC017643	2013-01-09	160	7w 6d	BCX	C57BL/6N;C57BL/6NTac	B6	5	B
BCX3.1e	BC017643:Hom	Homozygous	Female	2012-11-16	BC017643	2013-01-09	100	7w 5d	BCX	C57BL/6N;C57BL/6NTac	B6	5	B
BCX3.1f	BC017643:Hom	Homozygous	Female	2012-11-16	BC017643	2013-01-09	180	7w 5d	BCX	C57BL/6N;C57BL/6NTac	B6	5	B
IDO1.2e	Ido1:Hom	Homozygous	Female	2012-11-10	Ido1	2013-01-09	150	8w 4d	IDO	C57BL/6N;C57BL/6NTac	B6	5	B
IDO1.2f	Ido1:Hom	Homozygous	Female	2012-11-10	Ido1	2013-01-09	160	8w 4d	IDO	C57BL/6N;C57BL/6NTac	B6	5	B
IDO1.2g	Ido1:Hom	Homozygous	Female	2012-11-10	Ido1	2013-01-09	250	8w 4d	IDO	C57BL/6N;C57BL/6NTac	B6	5	B
IDO1.2h	Ido1:Hom	Homozygous	Female	2012-11-10	Ido1	2013-01-09	120	8w 4d	IDO	C57BL/6N;C57BL/6NTac	B6	5	B
IDO1.2i	Ido1:Hom	Homozygous	Female	2012-11-10	Ido1	2013-01-09	200	8w 4d	IDO	C57BL/6N;C57BL/6NTac	B6	5	B
IDO1.2j	Ido1:Hom	Homozygous	Female	2012-11-10	Ido1	2013-01-09	237	8w 4d	IDO	C57BL/6N;C57BL/6NTac	B6	5	B
IDO1.2k	Ido1:Hom	Homozygous	Female	2012-11-10	Ido1	2013-01-09	106	8w 4d	IDO	C57BL/6N;C57BL/6NTac	B6	5	B
IDO2.1d	Ido1:Hom	Homozygous	Female	2012-11-06	Ido1	2013-01-09	83	9w 1d	IDO	C57BL/6N;C57BL/6NTac	B6	5	B
RALG1.2a	WT	Wildtype	Male	2012-11-19		2013-01-14	115	8w	RALG	C57BL/6N;C57BL/6NTac	B6	5	A
RALG1.2c	WT	Wildtype	Male	2012-11-19		2013-01-14	160	8w	RALG	C57BL/6N;C57BL/6NTac	B6	5	A
RALG1.2d	WT	Wildtype	Male	2012-11-19		2013-01-14	280	8w	RALG	C57BL/6N;C57BL/6NTac	B6	5	A
RALG2.2a	WT	Wildtype	Male	2012-11-13		2013-01-14	120	8w 6d	RALG	C57BL/6N;C57BL/6NTac	B6	5	A
RALG2.2b	WT	Wildtype	Male	2012-11-13		2013-01-14	65	8w 6d	RALG	C57BL/6N;C57BL/6NTac	B6	5	A
MDVP60.1a	Nbeal2:Hom	Homozygous	Male	2012-11-17	Nbeal2	2013-01-14	60	8w 2d	NBEA	C57BL/6N;C57BL/6NTac	B6	5	A
MDVP60.1b	Nbeal2:Hom	Homozygous	Male	2012-11-17	Nbeal2	2013-01-14	75	8w 2d	NBEA	C57BL/6N;C57BL/6NTac	B6	5	A
MDVP61.1a	Nbeal2:Hom	Homozygous	Male	2012-11-19	Nbeal2	2013-01-14	15	8w	NBEA	C57BL/6N;C57BL/6NTac	B6	5	A
RUFY1.2a	Rufy2:Hom	Homozygous	Male	2012-11-19	Rufy2	2013-01-14	230	8w	RUFY	C57BL/6N;C57BL/6NTac	B6	5	A
RUFY1.2b	Rufy2:Hom	Homozygous	Male	2012-11-19	Rufy2	2013-01-14	190	8w	RUFY	C57BL/6N;C57BL/6NTac	B6	5	A
RUFY2.1a	Rufy2:Hom	Homozygous	Male	2012-10-24	Rufy2	2013-01-14	21	11w 5d	RUFY	C57BL/6N;C57BL/6NTac	B6	5	A
MDVP60.1c	Nbeal2:Het	Heterozygous	Male	2012-11-17	Nbeal2	2013-01-14	160	8w 2d	NBEA	C57BL/6N;C57BL/6NTac	B6	5	A
MDVP61.1b	Nbeal2:Het	Heterozygous	Male	2012-11-19	Nbeal2	2013-01-14	100	8w	NBEA	C57BL/6N;C57BL/6NTac	B6	5	A
MDVP62.1a	Nbeal2:Het	Heterozygous	Male	2012-11-16	Nbeal2	2013-01-14	170	8w 3d	NBEA	C57BL/6N;C57BL/6NTac	B6	5	A
MDVP62.1b	Nbeal2:Het	Heterozygous	Male	2012-11-16	Nbeal2	2013-01-14	56	8w 3d	NBEA	C57BL/6N;C57BL/6NTac	B6	5	A
MEUK20.1e	WT	Wildtype	Female	2012-11-23		2013-01-14	260	7w 3d	MEUK	C57BL/6N;C57BL/6NTac	B6	5	B
MEUK20.1i	WT	Wildtype	Female	2012-11-23		2013-01-14	154	7w 3d	MEUK	C57BL/6N;C57BL/6NTac	B6	5	B
RALG1.2e	WT	Wildtype	Female	2012-11-19		2013-01-14	93	8w	RALG	C57BL/6N;C57BL/6NTac	B6	5	B
RALG2.2e	WT	Wildtype	Female	2012-11-13		2013-01-14	200	8w 6d	RALG	C57BL/6N;C57BL/6NTac	B6	5	B
MDJL59.1b	WT	Wildtype	Female	2012-11-21		2013-01-14	174	7w 5d	MDJL	C57BL/6N;C57BL/6NTac	B6	5	B
MDJL59.1c	WT	Wildtype	Female	2012-11-21		2013-01-14	280	7w 5d	MDJL	C57BL/6N;C57BL/6NTac	B6	5	B
MDJL60.1e	WT	Wildtype	Female	2012-11-20		2013-01-14	225	7w 6d	MDJL	C57BL/6N;C57BL/6NTac	B6	5	B
MDJL60.1g	WT	Wildtype	Female	2012-11-20		2013-01-14	208	7w 6d	MDJL	C57BL/6N;C57BL/6NTac	B6	5	B
MDJL61.1e	WT	Wildtype	Female	2012-11-23		2013-01-14	160	7w 3d	MDJL	C57BL/6N;C57BL/6NTac	B6	5	B
MDJL61.1f	WT	Wildtype	Female	2012-11-23		2013-01-14	216	7w 3d	MDJL	C57BL/6N;C57BL/6NTac	B6	5	B
GPCF2.1d	Gpc5:Hom	Homozygous	Female	2012-11-19	Gpc5	2013-01-14	220	8w	GPCF	C57BL/6N;C57BL/6NTac	B6	5	B
GPCF2.1e	Gpc5:Hom	Homozygous	Female	2012-11-19	Gpc5	2013-01-14	185	8w	GPCF	C57BL/6N;C57BL/6NTac	B6	5	B
GPCF2.1f	Gpc5:Hom	Homozygous	Female	2012-11-19	Gpc5	2013-01-14	173	8w	GPCF	C57BL/6N;C57BL/6NTac	B6	5	B
GPCF2.1g	Gpc5:Hom	Homozygous	Female	2012-11-19	Gpc5	2013-01-14	80	8w	GPCF	C57BL/6N;C57BL/6NTac	B6	5	B
MDVP60.1f	Nbeal2:Hom	Homozygous	Female	2012-11-17	Nbeal2	2013-01-14	24	8w 2d	NBEA	C57BL/6N;C57BL/6NTac	B6	5	B
MDVP61.1c	Nbeal2:Hom	Homozygous	Female	2012-11-19	Nbeal2	2013-01-14	34	8w	NBEA	C57BL/6N;C57BL/6NTac	B6	5	B
MDVP61.1d	Nbeal2:Hom	Homozygous	Female	2012-11-19	Nbeal2	2013-01-14	58	8w	NBEA	C57BL/6N;C57BL/6NTac	B6	5	B
MDVP61.1f	Nbeal2:Hom	Homozygous	Female	2012-11-19	Nbeal2	2013-01-14	44	8w	NBEA	C57BL/6N;C57BL/6NTac	B6	5	B
MDVP62.1h	Nbeal2:Hom	Homozygous	Female	2012-11-16	Nbeal2	2013-01-14	60	8w 3d	NBEA	C57BL/6N;C57BL/6NTac	B6	5	B
MDVP61.1e	Nbeal2:Het	Heterozygous	Female	2012-11-19	Nbeal2	2013-01-14	91	8w	NBEA	C57BL/6N;C57BL/6NTac	B6	5	B
MEUK16.3b	WT	Wildtype	Female	2012-11-26		2013-01-21	270	8w	MEUK	C57BL/6N;C57BL/6NTac	B6	5	A
MEUK17.1i	WT	Wildtype	Female	2012-11-25		2013-01-21	300	8w 1d	MEUK	C57BL/6N;C57BL/6NTac	B6	5	A
MEUK19.1g	WT	Wildtype	Female	2012-11-26		2013-01-21	380	8w	MEUK	C57BL/6N;C57BL/6NTac	B6	5	A
MEWD7.2d	WT	Wildtype	Female	2012-11-26		2013-01-21	90	8w	MEWD	C57BL/6N;C57BL/6NTac	B6	5	A
MEWD7.2e	WT	Wildtype	Female	2012-11-26		2013-01-21	250	8w	MEWD	C57BL/6N;C57BL/6NTac	B6	5	A
MEWD7.2f	WT	Wildtype	Female	2012-11-26		2013-01-21	295	8w	MEWD	C57BL/6N;C57BL/6NTac	B6	5	A
MEQW15.1d	WT	Wildtype	Female	2012-11-25		2013-01-21	260	8w 1d	MEQW	C57BL/6N;C57BL/6NTac	B6	5	A
MEQW15.1g	WT	Wildtype	Female	2012-11-25		2013-01-21	325	8w 1d	MEQW	C57BL/6N;C57BL/6NTac	B6	5	A
CBLT2475.2d	WT	Wildtype	Female	2012-11-20		2013-01-21	236	8w 6d	CBLT	C57BL/6NTac	B6	5	A
CBLT2539.2c	WT	Wildtype	Female	2012-11-22		2013-01-21	300	8w 4d	CBLT	C57BL/6NTac	B6	5	A
CBLT2539.2d	WT	Wildtype	Female	2012-11-22		2013-01-21	220	8w 4d	CBLT	C57BL/6NTac	B6	5	A
CBLT2539.2e	WT	Wildtype	Female	2012-11-22		2013-01-21	280	8w 4d	CBLT	C57BL/6NTac	B6	5	A
CBLT2539.2f	WT	Wildtype	Female	2012-11-22		2013-01-21	200	8w 4d	CBLT	C57BL/6NTac	B6	5	A
CBLT2539.2g	WT	Wildtype	Female	2012-11-22		2013-01-21	220	8w 4d	CBLT	C57BL/6NTac	B6	5	A
MEKM32.4h	Exoc3l2:Hom	Homozygous	Female	2012-10-18	Exoc3l2	2013-01-21	306	13w 4d	MEKM	C57BL/6N;C57BL/6NTac	B6	5	A
MEKM32.5f	Exoc3l2:Hom	Homozygous	Female	2012-12-01	Exoc3l2	2013-01-21	200	7w 2d	MEKM	C57BL/6N;C57BL/6NTac	B6	5	A
MEKM33.3h	Exoc3l2:Hom	Homozygous	Female	2012-11-05	Exoc3l2	2013-01-21	230	11w	MEKM	C57BL/6N;C57BL/6NTac	B6	5	A
MEKM39.1g	Exoc3l2:Hom	Homozygous	Female	2012-10-15	Exoc3l2	2013-01-21	200	14w	MEKM	C57BL/6N;C57BL/6NTac	B6	5	A
MEQW18.1d	Naaa:Hom	Homozygous	Female	2012-11-22	Naaa	2013-01-21	250	8w 4d	MEQW	C57BL/6N;C57BL/6NTac	B6	5	A
BRDE12.3a	WT	Wildtype	Male	2012-12-09		2013-02-05	73	8w 2d	BRDE	C57BL/6Brd-Tyr<c-Brd>;C57BL/6Dnk;C57BL/6NTac	B6	5	A
BRDE12.3b	WT	Wildtype	Male	2012-12-09		2013-02-05	250	8w 2d	BRDE	C57BL/6Brd-Tyr<c-Brd>;C57BL/6Dnk;C57BL/6NTac	B6	5	A
BRDE14.1b	WT	Wildtype	Male	2012-12-02		2013-02-05	150	9w 2d	BRDE	C57BL/6Brd-Tyr<c-Brd>;C57BL/6Dnk;C57BL/6NTac	B6	5	A
BRDE14.1c	WT	Wildtype	Male	2012-12-02		2013-02-05	215	9w 2d	BRDE	C57BL/6Brd-Tyr<c-Brd>;C57BL/6Dnk;C57BL/6NTac	B6	5	A
BRDE14.1d	WT	Wildtype	Male	2012-12-02		2013-02-05	200	9w 2d	BRDE	C57BL/6Brd-Tyr<c-Brd>;C57BL/6Dnk;C57BL/6NTac	B6	5	A
CDCA4.1c	WT	Wildtype	Male	2012-12-12		2013-02-05	300	7w 6d	CDCA	C57BL/6N;C57BL/6NTac	B6	5	A
CDCA4.1e	WT	Wildtype	Male	2012-12-12		2013-02-05	200	7w 6d	CDCA	C57BL/6N;C57BL/6NTac	B6	5	A
CDCA6.1c	WT	Wildtype	Male	2012-12-07		2013-02-05	164	8w 4d	CDCA	C57BL/6N;C57BL/6NTac	B6	5	A
CDCA6.1d	WT	Wildtype	Male	2012-12-07		2013-02-05	66	8w 4d	CDCA	C57BL/6N;C57BL/6NTac	B6	5	A
CDCA6.1e	WT	Wildtype	Male	2012-12-07		2013-02-05	295	8w 4d	CDCA	C57BL/6N;C57BL/6NTac	B6	5	A
MEEN51.3b	WT	Wildtype	Male	2012-12-11		2013-02-05	220	8w	MEEN	C57BL/6N;C57BL/6NTac	B6	5	A
MEEN51.3d	WT	Wildtype	Male	2012-12-11		2013-02-05	275	8w	MEEN	C57BL/6N;C57BL/6NTac	B6	5	A
MEEN51.3e	WT	Wildtype	Male	2012-12-11		2013-02-05	245	8w	MEEN	C57BL/6N;C57BL/6NTac	B6	5	A
MDWN39.1a	WT	Wildtype	Male	2012-11-30		2013-02-05	180	9w 4d	MDWN	C57BL/6N;C57BL/6NTac	B6	5	A
MDWN42.1d	WT	Wildtype	Male	2012-11-28		2013-02-05	270	9w 6d	MDWN	C57BL/6N;C57BL/6NTac	B6	5	A
MDWN42.1e	WT	Wildtype	Male	2012-11-28		2013-02-05	260	9w 6d	MDWN	C57BL/6N;C57BL/6NTac	B6	5	A
IRFS5.1a	WT	Wildtype	Male	2012-12-09		2013-02-05	340	8w 2d	IRFS	C57BL/6N;C57BL/6NTac	B6	5	A
IRFS5.1b	WT	Wildtype	Male	2012-12-09		2013-02-05	335	8w 2d	IRFS	C57BL/6N;C57BL/6NTac	B6	5	A
MDGL58.1b	WT	Wildtype	Male	2012-12-03		2013-02-05	295	9w 1d	MDGL	C57BL/6N;C57BL/6NTac	B6	5	A
MDGL58.1d	WT	Wildtype	Male	2012-12-03		2013-02-05	264	9w 1d	MDGL	C57BL/6N;C57BL/6NTac	B6	5	A
MEHR25.4a	WT	Wildtype	Male	2012-12-12		2013-02-05	212	7w 6d	MEHR	C57BL/6N;C57BL/6NTac	B6	5	A
MEHR25.4b	WT	Wildtype	Male	2012-12-12		2013-02-05	215	7w 6d	MEHR	C57BL/6N;C57BL/6NTac	B6	5	A
MEHR25.4c	WT	Wildtype	Male	2012-12-12		2013-02-05	222	7w 6d	MEHR	C57BL/6N;C57BL/6NTac	B6	5	A
BCX2.1a	BC017643:Hom	Homozygous	Male	2012-11-22	BC017643	2013-02-05	225	10w 1d	BCX	C57BL/6N;C57BL/6NTac	B6	5	A
BCX2.1b	BC017643:Hom	Homozygous	Male	2012-11-22	BC017643	2013-02-05	210	10w 1d	BCX	C57BL/6N;C57BL/6NTac	B6	5	A
BCX2.1c	BC017643:Hom	Homozygous	Male	2012-11-22	BC017643	2013-02-05	187	10w 1d	BCX	C57BL/6N;C57BL/6NTac	B6	5	A
BCX2.1d	BC017643:Hom	Homozygous	Male	2012-11-22	BC017643	2013-02-05	205	10w 1d	BCX	C57BL/6N;C57BL/6NTac	B6	5	A
BCX2.1e	BC017643:Hom	Homozygous	Male	2012-11-22	BC017643	2013-02-05	93	10w 1d	BCX	C57BL/6N;C57BL/6NTac	B6	5	A
BRDE12.3c	Brd8:Het	Heterozygous	Male	2012-12-09	Brd8	2013-02-05	260	8w 2d	BRDE	C57BL/6Brd-Tyr<c-Brd>;C57BL/6Dnk;C57BL/6NTac	B6	5	A
BRDE13.3b	Brd8:Het	Heterozygous	Male	2012-12-12	Brd8	2013-02-05	325	7w 6d	BRDE	C57BL/6Brd-Tyr<c-Brd>;C57BL/6Dnk;C57BL/6NTac	B6	5	A
BRDE14.1a	Brd8:Het	Heterozygous	Male	2012-12-02	Brd8	2013-02-05	100	9w 2d	BRDE	C57BL/6Brd-Tyr<c-Brd>;C57BL/6Dnk;C57BL/6NTac	B6	5	A
BRDE14.1e	Brd8:Het	Heterozygous	Male	2012-12-02	Brd8	2013-02-05	155	9w 2d	BRDE	C57BL/6Brd-Tyr<c-Brd>;C57BL/6Dnk;C57BL/6NTac	B6	5	A
CDCA4.1a	Cdca8:Het	Heterozygous	Male	2012-12-12	Cdca8	2013-02-05	200	7w 6d	CDCA	C57BL/6N;C57BL/6NTac	B6	5	A
CDCA4.1b	Cdca8:Het	Heterozygous	Male	2012-12-12	Cdca8	2013-02-05	245	7w 6d	CDCA	C57BL/6N;C57BL/6NTac	B6	5	A
CDCA4.1d	Cdca8:Het	Heterozygous	Male	2012-12-12	Cdca8	2013-02-05	265	7w 6d	CDCA	C57BL/6N;C57BL/6NTac	B6	5	A
CDCA5.2a	Cdca8:Het	Heterozygous	Male	2012-12-13	Cdca8	2013-02-05		7w 5d	CDCA	C57BL/6N;C57BL/6NTac	B6	5	A	Excluded (as difficulty dosing)
CDCA5.2b	Cdca8:Het	Heterozygous	Male	2012-12-13	Cdca8	2013-02-05	240	7w 5d	CDCA	C57BL/6N;C57BL/6NTac	B6	5	A
CDCA6.1a	Cdca8:Het	Heterozygous	Male	2012-12-07	Cdca8	2013-02-05	175	8w 4d	CDCA	C57BL/6N;C57BL/6NTac	B6	5	A
CDCA6.1b	Cdca8:Het	Heterozygous	Male	2012-12-07	Cdca8	2013-02-05	216	8w 4d	CDCA	C57BL/6N;C57BL/6NTac	B6	5	A
CDCA6.1f	Cdca8:Het	Heterozygous	Male	2012-12-07	Cdca8	2013-02-05		8w 4d	CDCA	C57BL/6N;C57BL/6NTac	B6	5	A	Excluded (as difficulty dosing)
CDCA3.1a	WT	Wildtype	Female	2012-12-07		2013-02-05	365	8w 4d	CDCA	C57BL/6N;C57BL/6NTac	B6	5	B
CDCA3.1c	WT	Wildtype	Female	2012-12-07		2013-02-05	290	8w 4d	CDCA	C57BL/6N;C57BL/6NTac	B6	5	B
CDCA4.1f	WT	Wildtype	Female	2012-12-12		2013-02-05	212	7w 6d	CDCA	C57BL/6N;C57BL/6NTac	B6	5	B
CDCA5.2d	WT	Wildtype	Female	2012-12-13		2013-02-05		7w 5d	CDCA	C57BL/6N;C57BL/6NTac	B6	5	B	Excluded (as difficulty dosing)
CDCA5.2e	WT	Wildtype	Female	2012-12-13		2013-02-05	235	7w 5d	CDCA	C57BL/6N;C57BL/6NTac	B6	5	B
CDCA5.2f	WT	Wildtype	Female	2012-12-13		2013-02-05	250	7w 5d	CDCA	C57BL/6N;C57BL/6NTac	B6	5	B
CDCA6.1h	WT	Wildtype	Female	2012-12-07		2013-02-05	300	8w 4d	CDCA	C57BL/6N;C57BL/6NTac	B6	5	B
METC22.1c	WT	Wildtype	Female	2012-12-06		2013-02-05	356	8w 5d	METC	C57BL/6N;C57BL/6NTac	B6	5	B
METC22.1d	WT	Wildtype	Female	2012-12-06		2013-02-05	200	8w 5d	METC	C57BL/6N;C57BL/6NTac	B6	5	B
METC22.1e	WT	Wildtype	Female	2012-12-06		2013-02-05	315	8w 5d	METC	C57BL/6N;C57BL/6NTac	B6	5	B
MEYN14.2d	WT	Wildtype	Female	2012-12-05		2013-02-05	280	8w 6d	MEYN	C57BL/6N;C57BL/6NTac	B6	5	B
MEYN14.2f	WT	Wildtype	Female	2012-12-05		2013-02-05	290	8w 6d	MEYN	C57BL/6N;C57BL/6NTac	B6	5	B
MEYN14.2g	WT	Wildtype	Female	2012-12-05		2013-02-05	285	8w 6d	MEYN	C57BL/6N;C57BL/6NTac	B6	5	B
MEDL36.1d	2610029G23Rik:Hom	Homozygous	Female	2012-12-02	2610029G23Rik	2013-02-05	120	9w 2d	MEDL	C57BL/6N;C57BL/6NTac	B6	5	B
MEDL36.1e	2610029G23Rik:Hom	Homozygous	Female	2012-12-02	2610029G23Rik	2013-02-05	280	9w 2d	MEDL	C57BL/6N;C57BL/6NTac	B6	5	B
MEDL38.1d	2610029G23Rik:Hom	Homozygous	Female	2012-12-07	2610029G23Rik	2013-02-05	370	8w 4d	MEDL	C57BL/6N;C57BL/6NTac	B6	5	B
MEDL38.1f	2610029G23Rik:Hom	Homozygous	Female	2012-12-07	2610029G23Rik	2013-02-05	210	8w 4d	MEDL	C57BL/6N;C57BL/6NTac	B6	5	B
MEDL38.1g	2610029G23Rik:Hom	Homozygous	Female	2012-12-07	2610029G23Rik	2013-02-05	295	8w 4d	MEDL	C57BL/6N;C57BL/6NTac	B6	5	B
MEDL38.1h	2610029G23Rik:Hom	Homozygous	Female	2012-12-07	2610029G23Rik	2013-02-05	310	8w 4d	MEDL	C57BL/6N;C57BL/6NTac	B6	5	B
MENG24.3d	A830019P07Rik:Hom	Homozygous	Female	2012-12-06	A830019P07Rik	2013-02-05	300	8w 5d	MENG	C57BL/6N;C57BL/6NTac	B6	5	B
MENG25.2f	A830019P07Rik:Hom	Homozygous	Female	2012-12-05	A830019P07Rik	2013-02-05	156	8w 6d	MENG	C57BL/6N;C57BL/6NTac	B6	5	B
MENG26.2f	A830019P07Rik:Hom	Homozygous	Female	2012-11-30	A830019P07Rik	2013-02-05	336	9w 4d	MENG	C57BL/6N;C57BL/6NTac	B6	5	B
MENG27.2f	A830019P07Rik:Hom	Homozygous	Female	2012-12-11	A830019P07Rik	2013-02-05	250	8w	MENG	C57BL/6N;C57BL/6NTac	B6	5	B
MENG27.2h	A830019P07Rik:Hom	Homozygous	Female	2012-12-11	A830019P07Rik	2013-02-05	340	8w	MENG	C57BL/6N;C57BL/6NTac	B6	5	B
RFTN1.2h	Rftn2:Hom	Homozygous	Female	2012-11-24	Rftn2	2013-02-05	355	10w 3d	RFTN	C57BL/6N;C57BL/6NTac	B6	5	B
RFTN3.1d	Rftn2:Hom	Homozygous	Female	2012-12-11	Rftn2	2013-02-05	280	8w	RFTN	C57BL/6N;C57BL/6NTac	B6	5	B
RFTN3.1e	Rftn2:Hom	Homozygous	Female	2012-12-11	Rftn2	2013-02-05	416	8w	RFTN	C57BL/6N;C57BL/6NTac	B6	5	B
RFTN3.1f	Rftn2:Hom	Homozygous	Female	2012-12-11	Rftn2	2013-02-05	330	8w	RFTN	C57BL/6N;C57BL/6NTac	B6	5	B
RFTN3.1g	Rftn2:Hom	Homozygous	Female	2012-12-11	Rftn2	2013-02-05	356	8w	RFTN	C57BL/6N;C57BL/6NTac	B6	5	B
CDCA3.1b	Cdca8:Het	Heterozygous	Female	2012-12-07	Cdca8	2013-02-05	300	8w 4d	CDCA	C57BL/6N;C57BL/6NTac	B6	5	B
CDCA3.1d	Cdca8:Het	Heterozygous	Female	2012-12-07	Cdca8	2013-02-05	330	8w 4d	CDCA	C57BL/6N;C57BL/6NTac	B6	5	B
CDCA3.1e	Cdca8:Het	Heterozygous	Female	2012-12-07	Cdca8	2013-02-05	320	8w 4d	CDCA	C57BL/6N;C57BL/6NTac	B6	5	B
CDCA4.1g	Cdca8:Het	Heterozygous	Female	2012-12-12	Cdca8	2013-02-05	280	7w 6d	CDCA	C57BL/6N;C57BL/6NTac	B6	5	B
CDCA4.1h	Cdca8:Het	Heterozygous	Female	2012-12-12	Cdca8	2013-02-05	300	7w 6d	CDCA	C57BL/6N;C57BL/6NTac	B6	5	B
CDCA4.1i	Cdca8:Het	Heterozygous	Female	2012-12-12	Cdca8	2013-02-05	285	7w 6d	CDCA	C57BL/6N;C57BL/6NTac	B6	5	B
CDCA5.2c	Cdca8:Het	Heterozygous	Female	2012-12-13	Cdca8	2013-02-05	135	7w 5d	CDCA	C57BL/6N;C57BL/6NTac	B6	5	B
CDCA6.1g	Cdca8:Het	Heterozygous	Female	2012-12-07	Cdca8	2013-02-05	220	8w 4d	CDCA	C57BL/6N;C57BL/6NTac	B6	5	B
BRDE12.3e	WT	Wildtype	Female	2012-12-09		2013-02-05	307	8w 2d	BRDE	C57BL/6Brd-Tyr<c-Brd>;C57BL/6Dnk;C57BL/6NTac	B6	5	C
BRDE12.3h	WT	Wildtype	Female	2012-12-09		2013-02-05	58	8w 2d	BRDE	C57BL/6Brd-Tyr<c-Brd>;C57BL/6Dnk;C57BL/6NTac	B6	5	C
BRDE12.3i	WT	Wildtype	Female	2012-12-09		2013-02-05	250	8w 2d	BRDE	C57BL/6Brd-Tyr<c-Brd>;C57BL/6Dnk;C57BL/6NTac	B6	5	C
BRDE13.3f	WT	Wildtype	Female	2012-12-12		2013-02-05	175	7w 6d	BRDE	C57BL/6Brd-Tyr<c-Brd>;C57BL/6Dnk;C57BL/6NTac	B6	5	C
BRDE14.1g	WT	Wildtype	Female	2012-12-02		2013-02-05	250	9w 2d	BRDE	C57BL/6Brd-Tyr<c-Brd>;C57BL/6Dnk;C57BL/6NTac	B6	5	C
BRDE14.1h	WT	Wildtype	Female	2012-12-02		2013-02-05	306	9w 2d	BRDE	C57BL/6Brd-Tyr<c-Brd>;C57BL/6Dnk;C57BL/6NTac	B6	5	C
MEEN49.2f	WT	Wildtype	Female	2012-12-11		2013-02-05	200	8w	MEEN	C57BL/6N;C57BL/6NTac	B6	5	C
MEEN49.2g	WT	Wildtype	Female	2012-12-11		2013-02-05	280	8w	MEEN	C57BL/6N;C57BL/6NTac	B6	5	C
MEEN49.2h	WT	Wildtype	Female	2012-12-11		2013-02-05	350	8w	MEEN	C57BL/6N;C57BL/6NTac	B6	5	C
MEEN51.3g	WT	Wildtype	Female	2012-12-11		2013-02-05	200	8w	MEEN	C57BL/6N;C57BL/6NTac	B6	5	C
MEEN51.3j	WT	Wildtype	Female	2012-12-11		2013-02-05	320	8w	MEEN	C57BL/6N;C57BL/6NTac	B6	5	C
IRFS5.1d	WT	Wildtype	Female	2012-12-09		2013-02-05	260	8w 2d	IRFS	C57BL/6N;C57BL/6NTac	B6	5	C
IRFS5.1e	WT	Wildtype	Female	2012-12-09		2013-02-05	350	8w 2d	IRFS	C57BL/6N;C57BL/6NTac	B6	5	C
IRFS5.1f	WT	Wildtype	Female	2012-12-09		2013-02-05	260	8w 2d	IRFS	C57BL/6N;C57BL/6NTac	B6	5	C
IRFS5.1g	WT	Wildtype	Female	2012-12-09		2013-02-05	330	8w 2d	IRFS	C57BL/6N;C57BL/6NTac	B6	5	C
IRFS5.1h	WT	Wildtype	Female	2012-12-09		2013-02-05	360	8w 2d	IRFS	C57BL/6N;C57BL/6NTac	B6	5	C
MDZY29.2k	Kcnip4:Hom	Homozygous	Female	2012-12-09	Kcnip4	2013-02-05	320	8w 2d	MDZY	C57BL/6N;C57BL/6NTac	B6	5	C
MDZY34.1d	Kcnip4:Hom	Homozygous	Female	2012-12-13	Kcnip4	2013-02-05	324	7w 5d	MDZY	C57BL/6N;C57BL/6NTac	B6	5	C
MDZY34.1e	Kcnip4:Hom	Homozygous	Female	2012-12-13	Kcnip4	2013-02-05	220	7w 5d	MDZY	C57BL/6N;C57BL/6NTac	B6	5	C
MDZY34.1f	Kcnip4:Hom	Homozygous	Female	2012-12-13	Kcnip4	2013-02-05	336	7w 5d	MDZY	C57BL/6N;C57BL/6NTac	B6	5	C
MDZY34.1g	Kcnip4:Hom	Homozygous	Female	2012-12-13	Kcnip4	2013-02-05	310	7w 5d	MDZY	C57BL/6N;C57BL/6NTac	B6	5	C
BRDE12.3d	Brd8:Het	Heterozygous	Female	2012-12-09	Brd8	2013-02-05	370	8w 2d	BRDE	C57BL/6Brd-Tyr<c-Brd>;C57BL/6Dnk;C57BL/6NTac	B6	5	C
BRDE12.3f	Brd8:Het	Heterozygous	Female	2012-12-09	Brd8	2013-02-05	345	8w 2d	BRDE	C57BL/6Brd-Tyr<c-Brd>;C57BL/6Dnk;C57BL/6NTac	B6	5	C
BRDE12.3g	Brd8:Het	Heterozygous	Female	2012-12-09	Brd8	2013-02-05	330	8w 2d	BRDE	C57BL/6Brd-Tyr<c-Brd>;C57BL/6Dnk;C57BL/6NTac	B6	5	C
BRDE12.3j	Brd8:Het	Heterozygous	Female	2012-12-09	Brd8	2013-02-05	160	8w 2d	BRDE	C57BL/6Brd-Tyr<c-Brd>;C57BL/6Dnk;C57BL/6NTac	B6	5	C
BRDE13.3c	Brd8:Het	Heterozygous	Female	2012-12-12	Brd8	2013-02-05	230	7w 6d	BRDE	C57BL/6Brd-Tyr<c-Brd>;C57BL/6Dnk;C57BL/6NTac	B6	5	C
BRDE13.3e	Brd8:Het	Heterozygous	Female	2012-12-12	Brd8	2013-02-05	185	7w 6d	BRDE	C57BL/6Brd-Tyr<c-Brd>;C57BL/6Dnk;C57BL/6NTac	B6	5	C
BRDE13.3g	Brd8:Het	Heterozygous	Female	2012-12-12	Brd8	2013-02-05	345	7w 6d	BRDE	C57BL/6Brd-Tyr<c-Brd>;C57BL/6Dnk;C57BL/6NTac	B6	5	C
BRDE14.1f	Brd8:Het	Heterozygous	Female	2012-12-02	Brd8	2013-02-05	328	9w 2d	BRDE	C57BL/6Brd-Tyr<c-Brd>;C57BL/6Dnk;C57BL/6NTac	B6	5	C
BRDE14.1i	Brd8:Het	Heterozygous	Female	2012-12-02	Brd8	2013-02-05	245	9w 2d	BRDE	C57BL/6Brd-Tyr<c-Brd>;C57BL/6Dnk;C57BL/6NTac	B6	5	C
BRDE14.1j	Brd8:Het	Heterozygous	Female	2012-12-02	Brd8	2013-02-05	290	9w 2d	BRDE	C57BL/6Brd-Tyr<c-Brd>;C57BL/6Dnk;C57BL/6NTac	B6	5	C
MEEN51.3h	Creb3l1(e):Het	Heterozygous	Female	2012-12-11	Creb3l1	2013-02-05	215	8w	MEEN	C57BL/6N;C57BL/6NTac	B6	5	C
MEEN51.3i	Creb3l1(e):Het	Heterozygous	Female	2012-12-11	Creb3l1	2013-02-05	185	8w	MEEN	C57BL/6N;C57BL/6NTac	B6	5	C
MEEN52.2h	Creb3l1(e):Het	Heterozygous	Female	2012-12-07	Creb3l1	2013-02-05	240	8w 4d	MEEN	C57BL/6N;C57BL/6NTac	B6	5	C
MEEN52.2i	Creb3l1(e):Het	Heterozygous	Female	2012-12-07	Creb3l1	2013-02-05	340	8w 4d	MEEN	C57BL/6N;C57BL/6NTac	B6	5	C
MEEN52.2n	Creb3l1(e):Het	Heterozygous	Female	2012-12-07	Creb3l1	2013-02-05	226	8w 4d	MEEN	C57BL/6N;C57BL/6NTac	B6	5	C
MEEN52.2l	Creb3l1(e):Het	Heterozygous	Female	2012-12-07	Creb3l1	2013-02-05	230	8w	MEEN	C57BL/6N;C57BL/6NTac	B6	5	C
MEZW21.1e	WT	Wildtype	Female	2012-12-14		2013-02-11	340	8w 3d	MEZW	C57BL/6N;C57BL/6NTac	B6	5	A
MEZW21.1h	WT	Wildtype	Female	2012-12-14		2013-02-11	300	8w 3d	MEZW	C57BL/6N;C57BL/6NTac	B6	5	A
MEZW24.1b	WT	Wildtype	Female	2012-12-14		2013-02-11	120	8w 3d	MEZW	C57BL/6N;C57BL/6NTac	B6	5	A
RFTN6.1c	WT	Wildtype	Female	2012-12-16		2013-02-11	170	8w 1d	RFTN	C57BL/6N;C57BL/6NTac	B6	5	A
RFTN6.1d	WT	Wildtype	Female	2012-12-16		2013-02-11	336	8w 1d	RFTN	C57BL/6N;C57BL/6NTac	B6	5	A
RFTN6.1e	WT	Wildtype	Female	2012-12-16		2013-02-11	320	8w 1d	RFTN	C57BL/6N;C57BL/6NTac	B6	5	A
RFTN6.1f	WT	Wildtype	Female	2012-12-16		2013-02-11	90	8w 1d	RFTN	C57BL/6N;C57BL/6NTac	B6	5	A
RFTN6.1g	WT	Wildtype	Female	2012-12-16		2013-02-11	74	8w 1d	RFTN	C57BL/6N;C57BL/6NTac	B6	5	A
MEBK28.1d	WT	Wildtype	Female	2012-12-14		2013-02-11	233	8w 3d	MEBK	C57BL/6N;C57BL/6NTac	B6	5	A
MEBK28.1g	WT	Wildtype	Female	2012-12-14		2013-02-11	280	8w 3d	MEBK	C57BL/6N;C57BL/6NTac	B6	5	A
MEBK28.1h	WT	Wildtype	Female	2012-12-14		2013-02-11	160	8w 3d	MEBK	C57BL/6N;C57BL/6NTac	B6	5	A
MDJZ79.1f	WT	Wildtype	Female	2012-12-10		2013-02-11	215	9w	MDJZ	C57BL/6N;C57BL/6NTac	B6	5	A
MENA24.2c	Zfp719:Hom	Homozygous	Female	2012-12-19	Zfp719	2013-02-11	210	7w 5d	MENA	C57BL/6N;C57BL/6NTac	B6	5	A
MENA24.2d	Zfp719:Hom	Homozygous	Female	2012-12-19	Zfp719	2013-02-11	260	7w 5d	MENA	C57BL/6N;C57BL/6NTac	B6	5	A
MENA24.2e	Zfp719:Hom	Homozygous	Female	2012-12-19	Zfp719	2013-02-11	380	7w 5d	MENA	C57BL/6N;C57BL/6NTac	B6	5	A
MENA24.2f	Zfp719:Hom	Homozygous	Female	2012-12-19	Zfp719	2013-02-11	240	7w 5d	MENA	C57BL/6N;C57BL/6NTac	B6	5	A
MENA25.3c	Zfp719:Hom	Homozygous	Female	2012-12-21	Zfp719	2013-02-11	220	7w 3d	MENA	C57BL/6N;C57BL/6NTac	B6	5	A
MENA25.3d	Zfp719:Hom	Homozygous	Female	2012-12-21	Zfp719	2013-02-11	130	7w 3d	MENA	C57BL/6N;C57BL/6NTac	B6	5	A
MENA25.3e	Zfp719:Hom	Homozygous	Female	2012-12-21	Zfp719	2013-02-11	170	7w 3d	MENA	C57BL/6N;C57BL/6NTac	B6	5	A
MENA25.3f	Zfp719:Hom	Homozygous	Female	2012-12-21	Zfp719	2013-02-11		7w 3d	MENA	C57BL/6N;C57BL/6NTac	B6	5	A	Excluded (as difficulty dosing)
MCHV66.4c	Rcor2:Het	Heterozygous	Female	2012-12-08	Rcor2	2013-02-11		9w 2d	MCHV	C57BL/6N;C57BL/6NTac	B6	5	A	Excluded (as difficulty dosing)
MCHV66.4d	Rcor2:Het	Heterozygous	Female	2012-12-08	Rcor2	2013-02-11	300	9w 2d	MCHV	C57BL/6N;C57BL/6NTac	B6	5	A
MCHV66.4e	Rcor2:Het	Heterozygous	Female	2012-12-08	Rcor2	2013-02-11	205	9w 2d	MCHV	C57BL/6N;C57BL/6NTac	B6	5	A
MCHV67.3b	Rcor2:Het	Heterozygous	Female	2012-12-05	Rcor2	2013-02-11	150	9w 5d	MCHV	C57BL/6N;C57BL/6NTac	B6	5	A
MCHV67.3c	Rcor2:Het	Heterozygous	Female	2012-12-05	Rcor2	2013-02-11	190	9w 5d	MCHV	C57BL/6N;C57BL/6NTac	B6	5	A
MCHV76.3f	Rcor2:Het	Heterozygous	Female	2012-12-15	Rcor2	2013-02-11	203	8w 2d	MCHV	C57BL/6N;C57BL/6NTac	B6	5	A
MCHV76.3g	Rcor2:Het	Heterozygous	Female	2012-12-15	Rcor2	2013-02-11	306	8w 2d	MCHV	C57BL/6N;C57BL/6NTac	B6	5	A
MDJZ78.1a	Vps53:Het	Heterozygous	Female	2012-12-09	Vps53	2013-02-11	294	9w 1d	MDJZ	C57BL/6N;C57BL/6NTac	B6	5	A
MDJZ78.1c	Vps53:Het	Heterozygous	Female	2012-12-09	Vps53	2013-02-11	212	9w 1d	MDJZ	C57BL/6N;C57BL/6NTac	B6	5	A
MDJZ78.1d	Vps53:Het	Heterozygous	Female	2012-12-09	Vps53	2013-02-11	170	9w 1d	MDJZ	C57BL/6N;C57BL/6NTac	B6	5	A
MDJZ78.1e	Vps53:Het	Heterozygous	Female	2012-12-09	Vps53	2013-02-11	235	9w 1d	MDJZ	C57BL/6N;C57BL/6NTac	B6	5	A
MDJZ79.1h	Vps53:Het	Heterozygous	Female	2012-12-10	Vps53	2013-02-11	220	9w	MDJZ	C57BL/6N;C57BL/6NTac	B6	5	A
MDJZ80.1d	Vps53:Het	Heterozygous	Female	2012-12-14	Vps53	2013-02-11	260	8w 3d	MDJZ	C57BL/6N;C57BL/6NTac	B6	5	A
MDJZ83.1f	Vps53:Het	Heterozygous	Female	2012-12-12	Vps53	2013-02-11	330	8w 5d	MDJZ	C57BL/6N;C57BL/6NTac	B6	5	A
MFCA21.2h	WT	Wildtype	Female	2012-11-23		2013-02-11	200	11w 3d	MFCA	C57BL/6N;C57BL/6NTac	B6	5	B
MFCA22.2c	WT	Wildtype	Female	2012-11-23		2013-02-11	170	11w 3d	MFCA	C57BL/6N;C57BL/6NTac	B6	5	B
MDML40.1c	WT	Wildtype	Female	2012-12-13		2013-02-11	244	8w 4d	MDML	C57BL/6N;C57BL/6NTac	B6	5	B
MDML40.1d	WT	Wildtype	Female	2012-12-13		2013-02-11	160	8w 4d	MDML	C57BL/6N;C57BL/6NTac	B6	5	B
MDML40.1e	WT	Wildtype	Female	2012-12-13		2013-02-11	238	8w 4d	MDML	C57BL/6N;C57BL/6NTac	B6	5	B
MDML40.1f	WT	Wildtype	Female	2012-12-13		2013-02-11	212	8w 4d	MDML	C57BL/6N;C57BL/6NTac	B6	5	B
MDML40.1g	WT	Wildtype	Female	2012-12-13		2013-02-11	200	8w 4d	MDML	C57BL/6N;C57BL/6NTac	B6	5	B
MDML40.1h	WT	Wildtype	Female	2012-12-13		2013-02-11	160	8w 4d	MDML	C57BL/6N;C57BL/6NTac	B6	5	B
SPN10.2g	WT	Wildtype	Female	2012-12-17		2013-02-11	142	8w	SPN	C57BL/6Brd-Tyr<c-Brd>;C57BL/6Dnk;C57BL/6N;C57BL/6NTac	B6	5	B
SPN10.2h	WT	Wildtype	Female	2012-12-17		2013-02-11	200	8w	SPN	C57BL/6Brd-Tyr<c-Brd>;C57BL/6Dnk;C57BL/6N;C57BL/6NTac	B6	5	B
SPN10.2i	WT	Wildtype	Female	2012-12-17		2013-02-11	38	8w	SPN	C57BL/6Brd-Tyr<c-Brd>;C57BL/6Dnk;C57BL/6N;C57BL/6NTac	B6	5	B
DGLT7.1c	Dlg2:Hom	Homozygous	Female	2012-12-17	Dlg2	2013-02-11	320	8w	DGLT	C57BL/6N;C57BL/6NTac	B6	5	B
DGLT7.1d	Dlg2:Hom	Homozygous	Female	2012-12-17	Dlg2	2013-02-11		8w	DGLT	C57BL/6N;C57BL/6NTac	B6	5	B	Excluded (as difficulty dosing)
DGLT7.1e	Dlg2:Hom	Homozygous	Female	2012-12-17	Dlg2	2013-02-11	210	8w	DGLT	C57BL/6N;C57BL/6NTac	B6	5	B
DGLT7.1f	Dlg2:Hom	Homozygous	Female	2012-12-17	Dlg2	2013-02-11	245	8w	DGLT	C57BL/6N;C57BL/6NTac	B6	5	B
DGLT7.1g	Dlg2:Hom	Homozygous	Female	2012-12-17	Dlg2	2013-02-11	250	8w	DGLT	C57BL/6N;C57BL/6NTac	B6	5	B
DGLT8.1g	Dlg2:Hom	Homozygous	Female	2012-12-20	Dlg2	2013-02-11	265	7w 4d	DGLT	C57BL/6N;C57BL/6NTac	B6	5	B
MDSK43.1a	Myh14:Hom	Homozygous	Female	2012-12-11	Myh14	2013-02-11	134	8w 6d	MDSK	C57BL/6N;C57BL/6NTac	B6	5	B
MDSK43.1b	Myh14:Hom	Homozygous	Female	2012-12-11	Myh14	2013-02-11	128	8w 6d	MDSK	C57BL/6N;C57BL/6NTac	B6	5	B
MDSK43.1c	Myh14:Hom	Homozygous	Female	2012-12-11	Myh14	2013-02-11	135	8w 6d	MDSK	C57BL/6N;C57BL/6NTac	B6	5	B
MDSK44.1d	Myh14:Hom	Homozygous	Female	2012-12-20	Myh14	2013-02-11	110	7w 4d	MDSK	C57BL/6N;C57BL/6NTac	B6	5	B
MDSK44.1e	Myh14:Hom	Homozygous	Female	2012-12-20	Myh14	2013-02-11		7w 4d	MDSK	C57BL/6N;C57BL/6NTac	B6	5	B	Excluded (as difficulty dosing)
MDSK45.1d	Myh14:Hom	Homozygous	Female	2012-12-15	Myh14	2013-02-11		8w 2d	MDSK	C57BL/6N;C57BL/6NTac	B6	5	B	Excluded (as difficulty dosing)
MEZK15.2d	WT	Wildtype	Female	2012-12-23		2013-02-18	120	8w 1d	MEZK	C57BL/6N;C57BL/6NTac	B6	5	A
MEZK15.2e	WT	Wildtype	Female	2012-12-23		2013-02-18	220	8w 1d	MEZK	C57BL/6N;C57BL/6NTac	B6	5	A
MEZK15.2g	WT	Wildtype	Female	2012-12-23		2013-02-18	230	8w 1d	MEZK	C57BL/6N;C57BL/6NTac	B6	5	A
MEZK15.2h	WT	Wildtype	Female	2012-12-23		2013-02-18	200	8w 1d	MEZK	C57BL/6N;C57BL/6NTac	B6	5	A
MEZK15.2i	WT	Wildtype	Female	2012-12-23		2013-02-18	250	8w 1d	MEZK	C57BL/6N;C57BL/6NTac	B6	5	A
MELE28.1e	WT	Wildtype	Female	2012-12-29		2013-02-18	200	7w 2d	MELE	C57BL/6N;C57BL/6NTac	B6	5	A
MELE29.1d	WT	Wildtype	Female	2012-12-23		2013-02-18	300	8w 1d	MELE	C57BL/6N;C57BL/6NTac	B6	5	A
MELE29.1e	WT	Wildtype	Female	2012-12-23		2013-02-18	324	8w 1d	MELE	C57BL/6N;C57BL/6NTac	B6	5	A
MELE29.1f	WT	Wildtype	Female	2012-12-23		2013-02-18	160	8w 1d	MELE	C57BL/6N;C57BL/6NTac	B6	5	A
MELE29.1g	WT	Wildtype	Female	2012-12-23		2013-02-18	180	8w 1d	MELE	C57BL/6N;C57BL/6NTac	B6	5	A
MELE29.1h	WT	Wildtype	Female	2012-12-23		2013-02-18	265	8w 1d	MELE	C57BL/6N;C57BL/6NTac	B6	5	A
MEQX37.1c	WT	Wildtype	Female	2012-12-16		2013-02-18	180	9w 1d	MEQX	C57BL/6N;C57BL/6NTac	B6	5	A
MEQX37.1d	WT	Wildtype	Female	2012-12-16		2013-02-18	210	9w 1d	MEQX	C57BL/6N;C57BL/6NTac	B6	5	A
MEQX37.1e	WT	Wildtype	Female	2012-12-16		2013-02-18	300	9w 1d	MEQX	C57BL/6N;C57BL/6NTac	B6	5	A
MEQX38.1c	WT	Wildtype	Female	2012-12-15		2013-02-18	290	9w 2d	MEQX	C57BL/6N;C57BL/6NTac	B6	5	A
MEQD25.1i	Daam2:Hom	Homozygous	Female	2012-12-16	Daam2	2013-02-18	175	9w 1d	MEQD	C57BL/6N;C57BL/6NTac	B6	5	A
MEQD28.1e	Daam2:Hom	Homozygous	Female	2012-12-25	Daam2	2013-02-18	180	7w 6d	MEQD	C57BL/6N;C57BL/6NTac	B6	5	A
MEQD28.1f	Daam2:Hom	Homozygous	Female	2012-12-25	Daam2	2013-02-18	350	7w 6d	MEQD	C57BL/6N;C57BL/6NTac	B6	5	A
MEQD28.1g	Daam2:Hom	Homozygous	Female	2012-12-25	Daam2	2013-02-18	160	7w 6d	MEQD	C57BL/6N;C57BL/6NTac	B6	5	A
MEQD28.1h	Daam2:Hom	Homozygous	Female	2012-12-25	Daam2	2013-02-18		7w 6d	MEQD	C57BL/6N;C57BL/6NTac	B6	5	A	Excluded (as difficulty dosing)
MEQD28.1i	Daam2:Hom	Homozygous	Female	2012-12-25	Daam2	2013-02-18	250	7w 6d	MEQD	C57BL/6N;C57BL/6NTac	B6	5	A
MECE20.4e	Slc16a6:Hom	Homozygous	Female	2012-12-10	Slc16a6	2013-02-18	250	10w	MECE	C57BL/6N;C57BL/6NTac	B6	5	A
MECE27.2d	Slc16a6:Hom	Homozygous	Female	2012-12-26	Slc16a6	2013-02-18	260	7w 5d	MECE	C57BL/6N;C57BL/6NTac	B6	5	A
MECE27.2e	Slc16a6:Hom	Homozygous	Female	2012-12-26	Slc16a6	2013-02-18	265	7w 5d	MECE	C57BL/6N;C57BL/6NTac	B6	5	A
MECE27.2f	Slc16a6:Hom	Homozygous	Female	2012-12-26	Slc16a6	2013-02-18	270	7w 5d	MECE	C57BL/6N;C57BL/6NTac	B6	5	A
MECE27.2g	Slc16a6:Hom	Homozygous	Female	2012-12-26	Slc16a6	2013-02-18	235	7w 5d	MECE	C57BL/6N;C57BL/6NTac	B6	5	A
MECE27.2h	Slc16a6:Hom	Homozygous	Female	2012-12-26	Slc16a6	2013-02-18	70	7w 5d	MECE	C57BL/6N;C57BL/6NTac	B6	5	A
MDWE24.4c	Dctn1:Het	Heterozygous	Female	2012-12-27	Dctn1	2013-02-18	205	7w 4d	MDWE	C57BL/6N;C57BL/6NTac	B6	5	A
MDWE26.4e	Dctn1:Het	Heterozygous	Female	2012-12-24	Dctn1	2013-02-18	140	8w	MDWE	C57BL/6N;C57BL/6NTac	B6	5	A
MDWE38.1b	Dctn1:Het	Heterozygous	Female	2012-12-13	Dctn1	2013-02-18	167	9w 4d	MDWE	C57BL/6N;C57BL/6NTac	B6	5	A
MDWE39.1e	Dctn1:Het	Heterozygous	Female	2012-12-27	Dctn1	2013-02-18	220	7w 4d	MDWE	C57BL/6N;C57BL/6NTac	B6	5	A
MDWE39.1f	Dctn1:Het	Heterozygous	Female	2012-12-27	Dctn1	2013-02-18	235	7w 4d	MDWE	C57BL/6N;C57BL/6NTac	B6	5	A
MDWE39.1h	Dctn1:Het	Heterozygous	Female	2012-12-27	Dctn1	2013-02-18	256	7w 4d	MDWE	C57BL/6N;C57BL/6NTac	B6	5	A
MDWE40.1f	Dctn1:Het	Heterozygous	Female	2012-12-29	Dctn1	2013-02-18	217	7w 2d	MDWE	C57BL/6N;C57BL/6NTac	B6	5	A
MDJF40.2g	Glg1:Het	Heterozygous	Female	2012-12-09	Glg1	2013-02-18	210	10w 1d	MDJF	C57BL/6N;C57BL/6NTac	B6	5	A
MDJF40.2h	Glg1:Het	Heterozygous	Female	2012-12-09	Glg1	2013-02-18	210	10w 1d	MDJF	C57BL/6N;C57BL/6NTac	B6	5	A
MDJF40.2k	Glg1:Het	Heterozygous	Female	2012-12-09	Glg1	2013-02-18	225	10w 1d	MDJF	C57BL/6N;C57BL/6NTac	B6	5	A
MDJF41.2e	Glg1:Het	Heterozygous	Female	2012-12-21	Glg1	2013-02-18	290	8w 3d	MDJF	C57BL/6N;C57BL/6NTac	B6	5	A
MDJF41.2f	Glg1:Het	Heterozygous	Female	2012-12-21	Glg1	2013-02-18	350	8w 3d	MDJF	C57BL/6N;C57BL/6NTac	B6	5	A
MDJF41.2g	Glg1:Het	Heterozygous	Female	2012-12-21	Glg1	2013-02-18	140	8w 3d	MDJF	C57BL/6N;C57BL/6NTac	B6	5	A
MDXN40.2b	Map2k7:Het	Heterozygous	Female	2012-12-19	Map2k7	2013-02-18	325	8w 5d	MDXN	C57BL/6N;C57BL/6NTac	B6	5	A
MDXN40.2d	Map2k7:Het	Heterozygous	Female	2012-12-19	Map2k7	2013-02-18	260	8w 5d	MDXN	C57BL/6N;C57BL/6NTac	B6	5	A
MDXN43.1b	Map2k7:Het	Heterozygous	Female	2012-12-13	Map2k7	2013-02-18	150	9w 4d	MDXN	C57BL/6N;C57BL/6NTac	B6	5	A
MDXN43.1c	Map2k7:Het	Heterozygous	Female	2012-12-13	Map2k7	2013-02-18	260	9w 4d	MDXN	C57BL/6N;C57BL/6NTac	B6	5	A
MDXN43.1e	Map2k7:Het	Heterozygous	Female	2012-12-13	Map2k7	2013-02-18	240	9w 4d	MDXN	C57BL/6N;C57BL/6NTac	B6	5	A
MDXN43.1f	Map2k7:Het	Heterozygous	Female	2012-12-13	Map2k7	2013-02-18	160	9w 4d	MDXN	C57BL/6N;C57BL/6NTac	B6	5	A
MDXN44.1i	Map2k7:Het	Heterozygous	Female	2012-12-12	Map2k7	2013-02-18	220	9w 5d	MDXN	C57BL/6N;C57BL/6NTac	B6	5	A
MDXN46.1g	Map2k7:Het	Heterozygous	Female	2012-12-30	Map2k7	2013-02-18	240	7w 1d	MDXN	C57BL/6N;C57BL/6NTac	B6	5	A
MDNJ36.2h	Syt1:Het	Heterozygous	Female	2012-12-16	Syt1	2013-02-18	200	9w 1d	MDNJ	C57BL/6N;C57BL/6NTac	B6	5	A
MDNJ37.2h	Syt1:Het	Heterozygous	Female	2012-12-19	Syt1	2013-02-18	180	8w 5d	MDNJ	C57BL/6N;C57BL/6NTac	B6	5	A
MDNJ37.2k	Syt1:Het	Heterozygous	Female	2012-12-19	Syt1	2013-02-18	315	8w 5d	MDNJ	C57BL/6N;C57BL/6NTac	B6	5	A
MDNJ37.2l	Syt1:Het	Heterozygous	Female	2012-12-19	Syt1	2013-02-18	150	8w 5d	MDNJ	C57BL/6N;C57BL/6NTac	B6	5	A
MDNJ57.1e	Syt1:Het	Heterozygous	Female	2012-12-17	Syt1	2013-02-18	165	9w	MDNJ	C57BL/6N;C57BL/6NTac	B6	5	A
NFK2.2a	WT	Wildtype	Male	2012-12-21		2013-02-20	200	8w 5d	NFK	C57BL/6Brd-Tyr<c-Brd>;C57BL/6Dnk;C57BL/6NTac	B6	5	A
NFK2.2b	WT	Wildtype	Male	2012-12-21		2013-02-20	225	8w 5d	NFK	C57BL/6Brd-Tyr<c-Brd>;C57BL/6Dnk;C57BL/6NTac	B6	5	A
NFK2.2c	WT	Wildtype	Male	2012-12-21		2013-02-20	116	8w 5d	NFK	C57BL/6Brd-Tyr<c-Brd>;C57BL/6Dnk;C57BL/6NTac	B6	5	A
NFK2.2d	WT	Wildtype	Male	2012-12-21		2013-02-20	213	8w 5d	NFK	C57BL/6Brd-Tyr<c-Brd>;C57BL/6Dnk;C57BL/6NTac	B6	5	A
RFTN6.1a	WT	Wildtype	Male	2012-12-16		2013-02-20	128	9w 3d	RFTN	C57BL/6N;C57BL/6NTac	B6	5	A
RFTN6.1b	WT	Wildtype	Male	2012-12-16		2013-02-20	190	9w 3d	RFTN	C57BL/6N;C57BL/6NTac	B6	5	A
DGLT7.1a	Dlg2:Hom	Homozygous	Male	2012-12-17	Dlg2	2013-02-20	256	9w 2d	DGLT	C57BL/6N;C57BL/6NTac	B6	5	A
DGLT7.1b	Dlg2:Hom	Homozygous	Male	2012-12-17	Dlg2	2013-02-20	153	9w 2d	DGLT	C57BL/6N;C57BL/6NTac	B6	5	A
DGLT8.1a	Dlg2:Hom	Homozygous	Male	2012-12-20	Dlg2	2013-02-20	100	8w 6d	DGLT	C57BL/6N;C57BL/6NTac	B6	5	A
DGLT8.1b	Dlg2:Hom	Homozygous	Male	2012-12-20	Dlg2	2013-02-20	292	8w 6d	DGLT	C57BL/6N;C57BL/6NTac	B6	5	A
DGLT8.1c	Dlg2:Hom	Homozygous	Male	2012-12-20	Dlg2	2013-02-20	262	8w 6d	DGLT	C57BL/6N;C57BL/6NTac	B6	5	A
DGLT8.1d	Dlg2:Hom	Homozygous	Male	2012-12-20	Dlg2	2013-02-20	180	8w 6d	DGLT	C57BL/6N;C57BL/6NTac	B6	5	A
DGLT8.1e	Dlg2:Hom	Homozygous	Male	2012-12-20	Dlg2	2013-02-20	237	8w 6d	DGLT	C57BL/6N;C57BL/6NTac	B6	5	A
DGLT8.1f	Dlg2:Hom	Homozygous	Male	2012-12-20	Dlg2	2013-02-20	138	8w 6d	DGLT	C57BL/6N;C57BL/6NTac	B6	5	A
RSF129.1e	WT	Wildtype	Female	2012-12-26		2013-02-20	160	8w	RSF	C57BL/6JIco;C57BL/6Brd-Tyr<c-Brd>;129S5/SvEvBrd/Wtsi;C57BL/6J	129/B6	5	B
RSF130.1d	WT	Wildtype	Female	2012-12-19		2013-02-20	210	9w	RSF	C57BL/6JIco;C57BL/6Brd-Tyr<c-Brd>;129S5/SvEvBrd/Wtsi;C57BL/6J	129/B6	5	B
RSF130.1g	WT	Wildtype	Female	2012-12-19		2013-02-20	105	9w	RSF	C57BL/6JIco;C57BL/6Brd-Tyr<c-Brd>;129S5/SvEvBrd/Wtsi;C57BL/6J	129/B6	5	B
RSF130.1i	WT	Wildtype	Female	2012-12-19		2013-02-20	50	9w	RSF	C57BL/6JIco;C57BL/6Brd-Tyr<c-Brd>;129S5/SvEvBrd/Wtsi;C57BL/6J	129/B6	5	B
RSF130.1j	WT	Wildtype	Female	2012-12-19		2013-02-20	50	9w	RSF	C57BL/6JIco;C57BL/6Brd-Tyr<c-Brd>;129S5/SvEvBrd/Wtsi;C57BL/6J	129/B6	5	B
RSF127.1e	RSF:Hom	Homozygous	Female	2012-12-24	Rassf1	2013-02-20	59	8w 2d	RSF	C57BL/6JIco;C57BL/6Brd-Tyr<c-Brd>;129S5/SvEvBrd/Wtsi;C57BL/6J	129/B6	5	B
RSF127.1f	RSF:Hom	Homozygous	Female	2012-12-24	Rassf1	2013-02-20	60	8w 2d	RSF	C57BL/6JIco;C57BL/6Brd-Tyr<c-Brd>;129S5/SvEvBrd/Wtsi;C57BL/6J	129/B6	5	B
RSF127.1g	RSF:Hom	Homozygous	Female	2012-12-24	Rassf1	2013-02-20	52	8w 2d	RSF	C57BL/6JIco;C57BL/6Brd-Tyr<c-Brd>;129S5/SvEvBrd/Wtsi;C57BL/6J	129/B6	5	B
RSF130.1e	RSF:Het	Heterozygous	Female	2012-12-19	Rassf1	2013-02-20	161	9w	RSF	C57BL/6JIco;C57BL/6Brd-Tyr<c-Brd>;129S5/SvEvBrd/Wtsi;C57BL/6J	129/B6	5	B
MFBX9.2h	WT	Wildtype	Female	2013-01-01		2013-02-25	152	7w 6d	MFBX	C57BL/6N;C57BL/6NTac	B6	5	A
MFBX9.2j	WT	Wildtype	Female	2013-01-01		2013-02-25	146	7w 6d	MFBX	C57BL/6N;C57BL/6NTac	B6	5	A
MEVK10.1e	WT	Wildtype	Female	2012-12-31		2013-02-25	310	8w	MEVK	C57BL/6N;C57BL/6NTac	B6	5	A
MEVK8.4c	WT	Wildtype	Female	2013-01-01		2013-02-25	230	7w 6d	MEVK	C57BL/6N;C57BL/6NTac	B6	5	A
MEZU9.1d	WT	Wildtype	Female	2013-01-04		2013-02-25	290	7w 3d	MEZU	C57BL/6N;C57BL/6NTac	B6	5	A
MEZU9.1f	WT	Wildtype	Female	2013-01-04		2013-02-25	260	7w 3d	MEZU	C57BL/6N;C57BL/6NTac	B6	5	A
MEZU9.1g	WT	Wildtype	Female	2013-01-04		2013-02-25		7w 3d	MEZU	C57BL/6N;C57BL/6NTac	B6	5	A	Excluded (as difficulty dosing)
MEZU9.1h	WT	Wildtype	Female	2013-01-04		2013-02-25	286	7w 3d	MEZU	C57BL/6N;C57BL/6NTac	B6	5	A
MEZU9.1i	WT	Wildtype	Female	2013-01-04		2013-02-25	160	7w 3d	MEZU	C57BL/6N;C57BL/6NTac	B6	5	A
MEZU9.1j	WT	Wildtype	Female	2013-01-04		2013-02-25	244	7w 3d	MEZU	C57BL/6N;C57BL/6NTac	B6	5	A
MEZX21.2h	Dhrs2:Hom	Homozygous	Female	2012-12-28	Dhrs2	2013-02-25	300	8w 3d	MEZX	C57BL/6N;C57BL/6NTac	B6	5	A
MEZX21.2i	Dhrs2:Hom	Homozygous	Female	2012-12-28	Dhrs2	2013-02-25	310	8w 3d	MEZX	C57BL/6N;C57BL/6NTac	B6	5	A
MEZX21.2j	Dhrs2:Hom	Homozygous	Female	2012-12-28	Dhrs2	2013-02-25	300	8w 3d	MEZX	C57BL/6N;C57BL/6NTac	B6	5	A
MEZX25.2g	Dhrs2:Hom	Homozygous	Female	2012-12-31	Dhrs2	2013-02-25	325	8w	MEZX	C57BL/6N;C57BL/6NTac	B6	5	A
RIKA4.2b	Lacc1:Hom	Homozygous	Female	2012-12-18	Lacc1	2013-02-25	105	9w 6d	RIKA	C57BL/6N;C57BL/6NTac	B6	5	A
RIKA5.1c	Lacc1:Hom	Homozygous	Female	2013-01-01	Lacc1	2013-02-25	145	7w 6d	RIKA	C57BL/6N;C57BL/6NTac	B6	5	A
RIKA5.1d	Lacc1:Hom	Homozygous	Female	2013-01-01	Lacc1	2013-02-25	190	7w 6d	RIKA	C57BL/6N;C57BL/6NTac	B6	5	A
RIKA5.1e	Lacc1:Hom	Homozygous	Female	2013-01-01	Lacc1	2013-02-25	265	7w 6d	RIKA	C57BL/6N;C57BL/6NTac	B6	5	A
RIKA5.1f	Lacc1:Hom	Homozygous	Female	2013-01-01	Lacc1	2013-02-25	140	7w 6d	RIKA	C57BL/6N;C57BL/6NTac	B6	5	A
RIKA5.1g	Lacc1:Hom	Homozygous	Female	2013-01-01	Lacc1	2013-02-25	140	7w 6d	RIKA	C57BL/6N;C57BL/6NTac	B6	5	A
RIKA5.1i	Lacc1:Hom	Homozygous	Female	2013-01-01	Lacc1	2013-02-25	250	7w 6d	RIKA	C57BL/6N;C57BL/6NTac	B6	5	A
NBEA2.1a	Nbeal2:Hom	Homozygous	Female	2013-01-01	Nbeal2	2013-02-25	25	7w 6d	NBEA	C57BL/6N;C57BL/6NTac	B6	5	A
NBEA2.1b	Nbeal2:Hom	Homozygous	Female	2013-01-01	Nbeal2	2013-02-25	46	7w 6d	NBEA	C57BL/6N;C57BL/6NTac	B6	5	A
NBEA2.1c	Nbeal2:Hom	Homozygous	Female	2013-01-01	Nbeal2	2013-02-25	70	7w 6d	NBEA	C57BL/6N;C57BL/6NTac	B6	5	A
NBEA2.1d	Nbeal2:Hom	Homozygous	Female	2013-01-01	Nbeal2	2013-02-25	59	7w 6d	NBEA	C57BL/6N;C57BL/6NTac	B6	5	A
NBEA2.1g	Nbeal2:Hom	Homozygous	Female	2013-01-01	Nbeal2	2013-02-25	78	7w 6d	NBEA	C57BL/6N;C57BL/6NTac	B6	5	A
MEGB29.2f	Stard8:Hom	Homozygous	Female	2013-01-04	Stard8	2013-02-25	220	7w 3d	MEGB	C57BL/6N;C57BL/6NTac	B6	5	A
MEGB29.2g	Stard8:Hom	Homozygous	Female	2013-01-04	Stard8	2013-02-25	230	7w 3d	MEGB	C57BL/6N;C57BL/6NTac	B6	5	A
MEGB29.2i	Stard8:Hom	Homozygous	Female	2013-01-04	Stard8	2013-02-25		7w 3d	MEGB	C57BL/6N;C57BL/6NTac	B6	5	A	Excluded (as difficulty dosing)
MEGB30.2d	Stard8:Hom	Homozygous	Female	2012-12-25	Stard8	2013-02-25		8w 6d	MEGB	C57BL/6N;C57BL/6NTac	B6	5	A	Excluded (as difficulty dosing)
MEGB32.2c	Stard8:Hom	Homozygous	Female	2012-12-31	Stard8	2013-02-25	170	8w	MEGB	C57BL/6N;C57BL/6NTac	B6	5	A
MEGB32.2d	Stard8:Hom	Homozygous	Female	2012-12-31	Stard8	2013-02-25	105	8w	MEGB	C57BL/6N;C57BL/6NTac	B6	5	A
AKAP1.1f	WT	Wildtype	Female	2013-01-04		2013-02-25	330	7w 3d	AKAP	C57BL/6Brd-Tyr<c-Brd>;C57BL/6Dnk;C57BL/6NTac;C57BL/6	B6	5	B
AKAP2.1g	WT	Wildtype	Female	2013-01-04		2013-02-25	140	7w 3d	AKAP	C57BL/6Brd-Tyr<c-Brd>;C57BL/6Dnk;C57BL/6NTac;C57BL/6	B6	5	B
AKAP2.1h	WT	Wildtype	Female	2013-01-04		2013-02-25	350	7w 3d	AKAP	C57BL/6Brd-Tyr<c-Brd>;C57BL/6Dnk;C57BL/6NTac;C57BL/6	B6	5	B
AKAP3.1d	WT	Wildtype	Female	2013-01-04		2013-02-25		7w 3d	AKAP	C57BL/6Brd-Tyr<c-Brd>;C57BL/6Dnk;C57BL/6NTac;C57BL/6	B6	5	B	Excluded (count <30 so presumed failed dosing)
AKAP3.1e	WT	Wildtype	Female	2013-01-04		2013-02-25	100	7w 3d	AKAP	C57BL/6Brd-Tyr<c-Brd>;C57BL/6Dnk;C57BL/6NTac;C57BL/6	B6	5	B
MTYR15.4d	WT	Wildtype	Female	2013-01-07		2013-02-25	320	7w	MTYR	C57BL/6Brd-Tyr<c-Brd>;C57BL/6Dnk;C57BL/6N	B6	5	B
MTYR15.4e	WT	Wildtype	Female	2013-01-07		2013-02-25		7w	MTYR	C57BL/6Brd-Tyr<c-Brd>;C57BL/6Dnk;C57BL/6N	B6	5	B	Excluded (as difficulty dosing)
MTYR15.4g	WT	Wildtype	Female	2013-01-07		2013-02-25	200	7w	MTYR	C57BL/6Brd-Tyr<c-Brd>;C57BL/6Dnk;C57BL/6N	B6	5	B
MTYR16.3h	WT	Wildtype	Female	2012-12-25		2013-02-25	230	8w 6d	MTYR	C57BL/6Brd-Tyr<c-Brd>;C57BL/6Dnk;C57BL/6N	B6	5	B
MBCD142.1b	WT	Wildtype	Female	2013-01-02		2013-02-25	156	7w 5d	MBCD	C57BL/6Brd-Tyr<c-Brd>;C57BL/6Dnk;C57BL/6N;C57BL/6NTac	B6	5	B
MBCD142.1c	WT	Wildtype	Female	2013-01-02		2013-02-25	220	7w 5d	MBCD	C57BL/6Brd-Tyr<c-Brd>;C57BL/6Dnk;C57BL/6N;C57BL/6NTac	B6	5	B
MBCD144.1d	WT	Wildtype	Female	2013-01-02		2013-02-25	210	7w 5d	MBCD	C57BL/6Brd-Tyr<c-Brd>;C57BL/6Dnk;C57BL/6N;C57BL/6NTac	B6	5	B
MBCD145.1d	WT	Wildtype	Female	2013-01-03		2013-02-25	185	7w 4d	MBCD	C57BL/6Brd-Tyr<c-Brd>;C57BL/6Dnk;C57BL/6N;C57BL/6NTac	B6	5	B
AKAP1.1b	Akap9:Het	Heterozygous	Female	2013-01-04	Akap9	2013-02-25	215	7w 3d	AKAP	C57BL/6Brd-Tyr<c-Brd>;C57BL/6Dnk;C57BL/6NTac;C57BL/6	B6	5	B
AKAP1.1h	Akap9:Het	Heterozygous	Female	2013-01-04	Akap9	2013-02-25	200	7w 3d	AKAP	C57BL/6Brd-Tyr<c-Brd>;C57BL/6Dnk;C57BL/6NTac;C57BL/6	B6	5	B
AKAP2.1i	Akap9:Het	Heterozygous	Female	2013-01-04	Akap9	2013-02-25	210	7w 3d	AKAP	C57BL/6Brd-Tyr<c-Brd>;C57BL/6Dnk;C57BL/6NTac;C57BL/6	B6	5	B
AKAP2.1j	Akap9:Het	Heterozygous	Female	2013-01-04	Akap9	2013-02-25	240	7w 3d	AKAP	C57BL/6Brd-Tyr<c-Brd>;C57BL/6Dnk;C57BL/6NTac;C57BL/6	B6	5	B
MBCD135.3f	Sms:Het	Heterozygous	Female	2012-12-21	Sms	2013-02-25	300	9w 3d	MBCD	C57BL/6Brd-Tyr<c-Brd>;C57BL/6Dnk;C57BL/6N;C57BL/6NTac	B6	5	B
MBCD135.3h	Sms:Het	Heterozygous	Female	2012-12-21	Sms	2013-02-25	40	9w 3d	MBCD	C57BL/6Brd-Tyr<c-Brd>;C57BL/6Dnk;C57BL/6N;C57BL/6NTac	B6	5	B	Excluded (as difficulty dosing)
MBCD138.1g	Sms:Het	Heterozygous	Female	2012-12-29	Sms	2013-02-25	320	8w 2d	MBCD	C57BL/6Brd-Tyr<c-Brd>;C57BL/6Dnk;C57BL/6N;C57BL/6NTac	B6	5	B
MBCD141.1b	Sms:Het	Heterozygous	Female	2013-01-09	Sms	2013-02-25	126	6w 5d	MBCD	C57BL/6Brd-Tyr<c-Brd>;C57BL/6Dnk;C57BL/6N;C57BL/6NTac	B6	5	B
MBCD142.1d	Sms:Het	Heterozygous	Female	2013-01-02	Sms	2013-02-25	180	7w 5d	MBCD	C57BL/6Brd-Tyr<c-Brd>;C57BL/6Dnk;C57BL/6N;C57BL/6NTac	B6	5	B
MBCD143.1d	Sms:Het	Heterozygous	Female	2012-12-27	Sms	2013-02-25	223	8w 4d	MBCD	C57BL/6Brd-Tyr<c-Brd>;C57BL/6Dnk;C57BL/6N;C57BL/6NTac	B6	5	B
MBCD143.1e	Sms:Het	Heterozygous	Female	2012-12-27	Sms	2013-02-25	280	8w 4d	MBCD	C57BL/6Brd-Tyr<c-Brd>;C57BL/6Dnk;C57BL/6N;C57BL/6NTac	B6	5	B
MBCD144.1b	Sms:Het	Heterozygous	Female	2013-01-02	Sms	2013-02-25	356	7w 5d	MBCD	C57BL/6Brd-Tyr<c-Brd>;C57BL/6Dnk;C57BL/6N;C57BL/6NTac	B6	5	B
MBCD144.1c	Sms:Het	Heterozygous	Female	2013-01-02	Sms	2013-02-25	30	7w 5d	MBCD	C57BL/6Brd-Tyr<c-Brd>;C57BL/6Dnk;C57BL/6N;C57BL/6NTac	B6	5	B	Excluded (as difficulty dosing)
MBCD145.1e	Sms:Het	Heterozygous	Female	2013-01-03	Sms	2013-02-25	328	7w 4d	MBCD	C57BL/6Brd-Tyr<c-Brd>;C57BL/6Dnk;C57BL/6N;C57BL/6NTac	B6	5	B
AKAP2.1c	WT	Wildtype	Male	2013-01-04		2013-02-25	216	7w 3d	AKAP	C57BL/6Brd-Tyr<c-Brd>;C57BL/6Dnk;C57BL/6NTac;C57BL/6	B6	5	B
AKAP3.1a	WT	Wildtype	Male	2013-01-04		2013-02-25	62	7w 3d	AKAP	C57BL/6Brd-Tyr<c-Brd>;C57BL/6Dnk;C57BL/6NTac;C57BL/6	B6	5	B
AKAP3.1b	WT	Wildtype	Male	2013-01-04		2013-02-25	220	7w 3d	AKAP	C57BL/6Brd-Tyr<c-Brd>;C57BL/6Dnk;C57BL/6NTac;C57BL/6	B6	5	B
MEMK29.1a	WT	Wildtype	Male	2013-01-02		2013-02-25	70	7w 5d	MEMK	C57BL/6N;C57BL/6NTac	B6	5	B
MEMK29.1b	WT	Wildtype	Male	2013-01-02		2013-02-25	63	7w 5d	MEMK	C57BL/6N;C57BL/6NTac	B6	5	B
MEMK29.1d	WT	Wildtype	Male	2013-01-02		2013-02-25	205	7w 5d	MEMK	C57BL/6N;C57BL/6NTac	B6	5	B
MEMK29.1e	WT	Wildtype	Male	2013-01-02		2013-02-25	190	7w 5d	MEMK	C57BL/6N;C57BL/6NTac	B6	5	B
MEMK29.1f	WT	Wildtype	Male	2013-01-02		2013-02-25	170	7w 5d	MEMK	C57BL/6N;C57BL/6NTac	B6	5	B
IRFS6.1a	WT	Wildtype	Male	2013-01-01		2013-02-25	70	7w 6d	IRFS	C57BL/6N;C57BL/6NTac	B6	5	B
IRFS6.1b	WT	Wildtype	Male	2013-01-01		2013-02-25	140	7w 6d	IRFS	C57BL/6N;C57BL/6NTac	B6	5	B
IRFS6.1c	WT	Wildtype	Male	2013-01-01		2013-02-25	180	7w 6d	IRFS	C57BL/6N;C57BL/6NTac	B6	5	B
IRFS6.1d	WT	Wildtype	Male	2013-01-01		2013-02-25	133	7w 6d	IRFS	C57BL/6N;C57BL/6NTac	B6	5	B
GPCF1.2a	Gpc5:Hom	Homozygous	Male	2013-01-01	Gpc5	2013-02-25	127	7w 6d	GPCF	C57BL/6N;C57BL/6NTac	B6	5	B
GPCF1.2b	Gpc5:Hom	Homozygous	Male	2013-01-01	Gpc5	2013-02-25	225	7w 6d	GPCF	C57BL/6N;C57BL/6NTac	B6	5	B
GPCF1.2c	Gpc5:Hom	Homozygous	Male	2013-01-01	Gpc5	2013-02-25	245	7w 6d	GPCF	C57BL/6N;C57BL/6NTac	B6	5	B
GPCF1.2d	Gpc5:Hom	Homozygous	Male	2013-01-01	Gpc5	2013-02-25	265	7w 6d	GPCF	C57BL/6N;C57BL/6NTac	B6	5	B
RIKA3.2a	Lacc1:Hom	Homozygous	Male	2012-12-04	Lacc1	2013-02-25	248	11w 6d	RIKA	C57BL/6N;C57BL/6NTac	B6	5	B
RIKA3.2c	Lacc1:Hom	Homozygous	Male	2012-12-04	Lacc1	2013-02-25	180	11w 6d	RIKA	C57BL/6N;C57BL/6NTac	B6	5	B
RIKA4.2a	Lacc1:Hom	Homozygous	Male	2012-12-18	Lacc1	2013-02-25	60	9w 6d	RIKA	C57BL/6N;C57BL/6NTac	B6	5	B
RIKA5.1a	Lacc1:Hom	Homozygous	Male	2013-01-01	Lacc1	2013-02-25	151	7w 6d	RIKA	C57BL/6N;C57BL/6NTac	B6	5	B
RIKA5.1b	Lacc1:Hom	Homozygous	Male	2013-01-01	Lacc1	2013-02-25	100	7w 6d	RIKA	C57BL/6N;C57BL/6NTac	B6	5	B
AKAP3.1c	Akap9:Het	Heterozygous	Male	2013-01-04	Akap9	2013-02-25	135	7w 3d	AKAP	C57BL/6Brd-Tyr<c-Brd>;C57BL/6Dnk;C57BL/6NTac;C57BL/6	B6	5	B
MFEX23.1f	WT	Wildtype	Female	2013-01-01		2013-02-25	270	7w 6d	MFEX	C57BL/6N;C57BL/6NTac	B6	5	C
MFEX23.1g	WT	Wildtype	Female	2013-01-01		2013-02-25	260	7w 6d	MFEX	C57BL/6N;C57BL/6NTac	B6	5	C
MFBX10.2g	WT	Wildtype	Female	2013-01-02		2013-02-25	300	7w 5d	MFBX	C57BL/6N;C57BL/6NTac	B6	5	C
MFBX10.2j	WT	Wildtype	Female	2013-01-02		2013-02-25	330	7w 5d	MFBX	C57BL/6N;C57BL/6NTac	B6	5	C
IRFS6.1e	WT	Wildtype	Female	2013-01-01		2013-02-25	284	7w 6d	IRFS	C57BL/6N;C57BL/6NTac	B6	5	C
IRFS6.1f	WT	Wildtype	Female	2013-01-01		2013-02-25	130	7w 6d	IRFS	C57BL/6N;C57BL/6NTac	B6	5	C
MEQN28.1c	WT	Wildtype	Female	2013-01-02		2013-02-25	430	7w 5d	MEQN	C57BL/6N;C57BL/6NTac	B6	5	C
MEQN28.1g	WT	Wildtype	Female	2013-01-02		2013-02-25	360	7w 5d	MEQN	C57BL/6N;C57BL/6NTac	B6	5	C
MEQN31.1e	WT	Wildtype	Female	2013-01-01		2013-02-25	320	7w 6d	MEQN	C57BL/6N;C57BL/6NTac	B6	5	C
MDGD42.1c	WT	Wildtype	Female	2013-01-02		2013-02-25	260	7w 5d	MDGD	C57BL/6N;C57BL/6NTac	B6	5	C
MDGD42.1e	WT	Wildtype	Female	2013-01-02		2013-02-25	100	7w 5d	MDGD	C57BL/6N;C57BL/6NTac	B6	5	C
MDGD42.1f	WT	Wildtype	Female	2013-01-02		2013-02-25	190	7w 5d	MDGD	C57BL/6N;C57BL/6NTac	B6	5	C
MEER30.1a	Atad2:Hom	Homozygous	Female	2012-12-31	Atad2	2013-02-25	260	8w	MEER	C57BL/6N;C57BL/6NTac	B6	5	C
MEER30.1b	Atad2:Hom	Homozygous	Female	2012-12-31	Atad2	2013-02-25	120	8w	MEER	C57BL/6N;C57BL/6NTac	B6	5	C
MEER30.1c	Atad2:Hom	Homozygous	Female	2012-12-31	Atad2	2013-02-25		8w	MEER	C57BL/6N;C57BL/6NTac	B6	5	C	Excluded (as difficulty dosing)
MEER30.1d	Atad2:Hom	Homozygous	Female	2012-12-31	Atad2	2013-02-25	246	8w	MEER	C57BL/6N;C57BL/6NTac	B6	5	C
MEER30.1e	Atad2:Hom	Homozygous	Female	2012-12-31	Atad2	2013-02-25		8w	MEER	C57BL/6N;C57BL/6NTac	B6	5	C	Excluded (as difficulty dosing)
MEER34.1d	Atad2:Hom	Homozygous	Female	2013-01-01	Atad2	2013-02-25	280	7w 6d	MEER	C57BL/6N;C57BL/6NTac	B6	5	C
MEER34.1e	Atad2:Hom	Homozygous	Female	2013-01-01	Atad2	2013-02-25	260	7w 6d	MEER	C57BL/6N;C57BL/6NTac	B6	5	C
GPCF1.2e	Gpc5:Hom	Homozygous	Female	2013-01-01	Gpc5	2013-02-25	210	7w 6d	GPCF	C57BL/6N;C57BL/6NTac	B6	5	C
GPCF1.2f	Gpc5:Hom	Homozygous	Female	2013-01-01	Gpc5	2013-02-25	280	7w 6d	GPCF	C57BL/6N;C57BL/6NTac	B6	5	C
GPCF1.2g	Gpc5:Hom	Homozygous	Female	2013-01-01	Gpc5	2013-02-25	288	7w 6d	GPCF	C57BL/6N;C57BL/6NTac	B6	5	C
GPCF1.2h	Gpc5:Hom	Homozygous	Female	2013-01-01	Gpc5	2013-02-25	256	7w 6d	GPCF	C57BL/6N;C57BL/6NTac	B6	5	C
GPCF1.2i	Gpc5:Hom	Homozygous	Female	2013-01-01	Gpc5	2013-02-25	310	7w 6d	GPCF	C57BL/6N;C57BL/6NTac	B6	5	C
GPCF1.2j	Gpc5:Hom	Homozygous	Female	2013-01-01	Gpc5	2013-02-25	200	7w 6d	GPCF	C57BL/6N;C57BL/6NTac	B6	5	C
GPCF1.2k	Gpc5:Hom	Homozygous	Female	2013-01-01	Gpc5	2013-02-25	290	7w 6d	GPCF	C57BL/6N;C57BL/6NTac	B6	5	C
GPCF1.2l	Gpc5:Hom	Homozygous	Female	2013-01-01	Gpc5	2013-02-25	164	7w 6d	GPCF	C57BL/6N;C57BL/6NTac	B6	5	C
MEEH32.1e	Selk:Hom	Homozygous	Female	2013-01-04	Selk	2013-02-25	235	7w 3d	MEEH	C57BL/6N;C57BL/6NTac	B6	5	C
MEEH33.1d	Selk:Hom	Homozygous	Female	2013-01-01	Selk	2013-02-25	230	7w 6d	MEEH	C57BL/6N;C57BL/6NTac	B6	5	C
MEEH34.1c	Selk:Hom	Homozygous	Female	2013-01-02	Selk	2013-02-25	270	7w 5d	MEEH	C57BL/6N;C57BL/6NTac	B6	5	C
MEEH34.1d	Selk:Hom	Homozygous	Female	2013-01-02	Selk	2013-02-25	185	7w 5d	MEEH	C57BL/6N;C57BL/6NTac	B6	5	C
MEEH34.1e	Selk:Hom	Homozygous	Female	2013-01-02	Selk	2013-02-25	190	7w 5d	MEEH	C57BL/6N;C57BL/6NTac	B6	5	C
MEEH34.1f	Selk:Hom	Homozygous	Female	2013-01-02	Selk	2013-02-25	300	7w 5d	MEEH	C57BL/6N;C57BL/6NTac	B6	5	C
MCQP82.3d	Cnot6:Het	Heterozygous	Female	2013-01-02	Cnot6	2013-02-25	340	7w 5d	MCQP	C57BL/6N;C57BL/6NTac	B6	5	C
MCQP82.3e	Cnot6:Het	Heterozygous	Female	2013-01-02	Cnot6	2013-02-25	150	7w 5d	MCQP	C57BL/6N;C57BL/6NTac	B6	5	C
MCQP82.3f	Cnot6:Het	Heterozygous	Female	2013-01-02	Cnot6	2013-02-25	290	7w 5d	MCQP	C57BL/6N;C57BL/6NTac	B6	5	C
MCQP82.3g	Cnot6:Het	Heterozygous	Female	2013-01-02	Cnot6	2013-02-25	310	7w 5d	MCQP	C57BL/6N;C57BL/6NTac	B6	5	C
MCQP84.4c	Cnot6:Het	Heterozygous	Female	2012-12-26	Cnot6	2013-02-25	240	8w 5d	MCQP	C57BL/6N;C57BL/6NTac	B6	5	C
MDML40.2c	WT	Wildtype	Female	2013-01-04		2013-03-04	225	8w 3d	MDML	C57BL/6N;C57BL/6NTac	B6	5	A
MDML43.1d	WT	Wildtype	Female	2013-01-04		2013-03-04	300	8w 3d	MDML	C57BL/6N;C57BL/6NTac	B6	5	A
MDML44.1b	WT	Wildtype	Female	2013-01-02		2013-03-04	210	8w 5d	MDML	C57BL/6N;C57BL/6NTac	B6	5	A
MDML44.1c	WT	Wildtype	Female	2013-01-02		2013-03-04	120	8w 5d	MDML	C57BL/6N;C57BL/6NTac	B6	5	A
MDML44.1d	WT	Wildtype	Female	2013-01-02		2013-03-04	163	8w 5d	MDML	C57BL/6N;C57BL/6NTac	B6	5	A
MDML44.1h	WT	Wildtype	Female	2013-01-02		2013-03-04	150	8w 5d	MDML	C57BL/6N;C57BL/6NTac	B6	5	A
MFAC22.2e	WT	Wildtype	Female	2013-01-04		2013-03-04	256	8w 3d	MFAC	C57BL/6N;C57BL/6NTac	B6	5	A
MFAC22.2f	WT	Wildtype	Female	2013-01-04		2013-03-04	145	8w 3d	MFAC	C57BL/6N;C57BL/6NTac	B6	5	A
MFAC23.1e	WT	Wildtype	Female	2012-12-28		2013-03-04	220	9w 3d	MFAC	C57BL/6N;C57BL/6NTac	B6	5	A
MFAC23.1i	WT	Wildtype	Female	2012-12-28		2013-03-04	176	9w 3d	MFAC	C57BL/6N;C57BL/6NTac	B6	5	A
LIXO2.1f	WT	Wildtype	Female	2013-01-07		2013-03-04	156	8w	LIXO	C57BL/6N;C57BL/6NTac	B6	5	A
LIXO2.1j	WT	Wildtype	Female	2013-01-07		2013-03-04	266	8w	LIXO	C57BL/6N;C57BL/6NTac	B6	5	A
LIXO2.1k	WT	Wildtype	Female	2013-01-07		2013-03-04	210	8w	LIXO	C57BL/6N;C57BL/6NTac	B6	5	A
MFED17.2d	WT	Wildtype	Female	2012-12-25		2013-03-04	160	9w 6d	MFED	C57BL/6N;C57BL/6NTac	B6	5	A
MFED17.2e	WT	Wildtype	Female	2012-12-25		2013-03-04	230	9w 6d	MFED	C57BL/6N;C57BL/6NTac	B6	5	A
MFED17.2f	WT	Wildtype	Female	2012-12-25		2013-03-04	180	9w 6d	MFED	C57BL/6N;C57BL/6NTac	B6	5	A
MFED17.2g	WT	Wildtype	Female	2012-12-25		2013-03-04	290	9w 6d	MFED	C57BL/6N;C57BL/6NTac	B6	5	A
MFED17.2h	WT	Wildtype	Female	2012-12-25		2013-03-04	220	9w 6d	MFED	C57BL/6N;C57BL/6NTac	B6	5	A
MERR16.1g	WT	Wildtype	Female	2013-01-06		2013-03-04	234	8w 1d	MERR	C57BL/6N;C57BL/6NTac	B6	5	A
MERR17.1g	WT	Wildtype	Female	2013-01-10		2013-03-04	74	7w 4d	MERR	C57BL/6N;C57BL/6NTac	B6	5	A
MERR19.1e	WT	Wildtype	Female	2013-01-10		2013-03-04	265	7w 4d	MERR	C57BL/6N;C57BL/6NTac	B6	5	A
MERR19.1f	WT	Wildtype	Female	2013-01-10		2013-03-04	260	7w 4d	MERR	C57BL/6N;C57BL/6NTac	B6	5	A
MERR22.1e	WT	Wildtype	Female	2013-01-10		2013-03-04	225	7w 4d	MERR	C57BL/6N;C57BL/6NTac	B6	5	A
MERR22.1f	WT	Wildtype	Female	2013-01-10		2013-03-04	300	7w 4d	MERR	C57BL/6N;C57BL/6NTac	B6	5	A
MECY38.2d	3830417A13Rik:Hom	Homozygous	Female	2012-12-11	3830417A13Rik	2013-03-04	220	11w 6d	MECY	C57BL/6N;C57BL/6NTac	B6	5	A
MECY43.1e	3830417A13Rik:Hom	Homozygous	Female	2013-01-02	3830417A13Rik	2013-03-04	121	8w 5d	MECY	C57BL/6N;C57BL/6NTac	B6	5	A
MECY46.1d	3830417A13Rik:Hom	Homozygous	Female	2013-01-02	3830417A13Rik	2013-03-04	236	8w 5d	MECY	C57BL/6N;C57BL/6NTac	B6	5	A
MECY46.1e	3830417A13Rik:Hom	Homozygous	Female	2013-01-02	3830417A13Rik	2013-03-04	106	8w 5d	MECY	C57BL/6N;C57BL/6NTac	B6	5	A
MECY46.1f	3830417A13Rik:Hom	Homozygous	Female	2013-01-02	3830417A13Rik	2013-03-04	206	8w 5d	MECY	C57BL/6N;C57BL/6NTac	B6	5	A
MECY46.1g	3830417A13Rik:Hom	Homozygous	Female	2013-01-02	3830417A13Rik	2013-03-04	250	8w 5d	MECY	C57BL/6N;C57BL/6NTac	B6	5	A
BCX1.2d	BC017643:Hom	Homozygous	Female	2012-12-26	BC017643	2013-03-04	106	9w 5d	BCX	C57BL/6N;C57BL/6NTac	B6	5	A
BCX4.1a	BC017643:Hom	Homozygous	Female	2013-01-02	BC017643	2013-03-04		8w 5d	BCX	C57BL/6N;C57BL/6NTac	B6	5	A	Excluded (difficulty dosing)
BCX4.1b	BC017643:Hom	Homozygous	Female	2013-01-02	BC017643	2013-03-04	122	8w 5d	BCX	C57BL/6N;C57BL/6NTac	B6	5	A
BCX4.1c	BC017643:Hom	Homozygous	Female	2013-01-02	BC017643	2013-03-04	105	8w 5d	BCX	C57BL/6N;C57BL/6NTac	B6	5	A
BCX4.1d	BC017643:Hom	Homozygous	Female	2013-01-02	BC017643	2013-03-04	103	8w 5d	BCX	C57BL/6N;C57BL/6NTac	B6	5	A
BCX6.1f	BC017643:Hom	Homozygous	Female	2013-01-08	BC017643	2013-03-04	258	7w 6d	BCX	C57BL/6N;C57BL/6NTac	B6	5	A
BCX6.1g	BC017643:Hom	Homozygous	Female	2013-01-08	BC017643	2013-03-04	140	7w 6d	BCX	C57BL/6N;C57BL/6NTac	B6	5	A
MELB27.2g	Cdh19:Hom	Homozygous	Female	2012-12-27	Cdh19	2013-03-04	180	9w 4d	MELB	C57BL/6N;C57BL/6NTac	B6	5	A
MELB27.2h	Cdh19:Hom	Homozygous	Female	2012-12-27	Cdh19	2013-03-04	194	9w 4d	MELB	C57BL/6N;C57BL/6NTac	B6	5	A
MELB27.2j	Cdh19:Hom	Homozygous	Female	2012-12-27	Cdh19	2013-03-04	256	9w 4d	MELB	C57BL/6N;C57BL/6NTac	B6	5	A
MELB28.2h	Cdh19:Hom	Homozygous	Female	2013-01-06	Cdh19	2013-03-04	320	8w 1d	MELB	C57BL/6N;C57BL/6NTac	B6	5	A
MELB28.2j	Cdh19:Hom	Homozygous	Female	2013-01-06	Cdh19	2013-03-04	240	8w 1d	MELB	C57BL/6N;C57BL/6NTac	B6	5	A
MELB28.2m	Cdh19:Hom	Homozygous	Female	2013-01-06	Cdh19	2013-03-04	145	8w 1d	MELB	C57BL/6N;C57BL/6NTac	B6	5	A
MEBV33.3k	Fbxo7:Hom	Homozygous	Female	2012-12-29	Fbxo7	2013-03-04	66	9w 2d	MEBV	C57BL/6N;C57BL/6NTac	B6	5	A
MEBV34.3e	Fbxo7:Hom	Homozygous	Female	2013-01-07	Fbxo7	2013-03-04	156	8w	MEBV	C57BL/6N;C57BL/6NTac	B6	5	A
MEBV34.3g	Fbxo7:Hom	Homozygous	Female	2013-01-07	Fbxo7	2013-03-04	41	8w	MEBV	C57BL/6N;C57BL/6NTac	B6	5	A
MEBV38.2g	Fbxo7:Hom	Homozygous	Female	2013-01-04	Fbxo7	2013-03-04	73	8w 3d	MEBV	C57BL/6N;C57BL/6NTac	B6	5	A
IDO2.2b	Ido1:Hom	Homozygous	Female	2013-01-05	Ido1	2013-03-04	260	8w 2d	IDO	C57BL/6N;C57BL/6NTac	B6	5	A
IDO2.2d	Ido1:Hom	Homozygous	Female	2013-01-05	Ido1	2013-03-04	170	8w 2d	IDO	C57BL/6N;C57BL/6NTac	B6	5	A
IDO2.2e	Ido1:Hom	Homozygous	Female	2013-01-05	Ido1	2013-03-04	290	8w 2d	IDO	C57BL/6N;C57BL/6NTac	B6	5	A
IDO2.2f	Ido1:Hom	Homozygous	Female	2013-01-05	Ido1	2013-03-04	430	8w 2d	IDO	C57BL/6N;C57BL/6NTac	B6	5	A
IDO2.2g	Ido1:Hom	Homozygous	Female	2013-01-05	Ido1	2013-03-04		8w 2d	IDO	C57BL/6N;C57BL/6NTac	B6	5	A	Excluded (as difficulty dosing)
MERR12.2c	Zcchc14:Het	Heterozygous	Female	2012-12-22	Zcchc14	2013-03-04	54	10w 2d	MERR	C57BL/6N;C57BL/6NTac	B6	5	A
MERR12.2d	Zcchc14:Het	Heterozygous	Female	2012-12-22	Zcchc14	2013-03-04	240	10w 2d	MERR	C57BL/6N;C57BL/6NTac	B6	5	A
MERR16.1f	Zcchc14:Het	Heterozygous	Female	2013-01-06	Zcchc14	2013-03-04	238	8w 1d	MERR	C57BL/6N;C57BL/6NTac	B6	5	A
MERR18.1e	Zcchc14:Het	Heterozygous	Female	2013-01-07	Zcchc14	2013-03-04	225	8w	MERR	C57BL/6N;C57BL/6NTac	B6	5	A
MERR18.1f	Zcchc14:Het	Heterozygous	Female	2013-01-07	Zcchc14	2013-03-04	336	8w	MERR	C57BL/6N;C57BL/6NTac	B6	5	A
MERR18.1g	Zcchc14:Het	Heterozygous	Female	2013-01-07	Zcchc14	2013-03-04	52	8w	MERR	C57BL/6N;C57BL/6NTac	B6	5	A
MERR21.1e	Zcchc14:Het	Heterozygous	Female	2013-01-06	Zcchc14	2013-03-04	280	8w 1d	MERR	C57BL/6N;C57BL/6NTac	B6	5	A
MFGY18.2c	WT	Wildtype	Male	2012-12-28		2013-03-04	136	9w 3d	MFGY	C57BL/6N;C57BL/6NTac	B6	5	B
MFGY19.1a	WT	Wildtype	Male	2012-12-27		2013-03-04		9w 4d	MFGY	C57BL/6N;C57BL/6NTac	B6	5	B	Excluded (as difficulty dosing)
MFGY19.1b	WT	Wildtype	Male	2012-12-27		2013-03-04	135	9w 4d	MFGY	C57BL/6N;C57BL/6NTac	B6	5	B
MFGY19.1d	WT	Wildtype	Male	2012-12-27		2013-03-04	160	9w 4d	MFGY	C57BL/6N;C57BL/6NTac	B6	5	B
MFGY19.1e	WT	Wildtype	Male	2012-12-27		2013-03-04	200	9w 4d	MFGY	C57BL/6N;C57BL/6NTac	B6	5	B
MERR17.1d	WT	Wildtype	Male	2013-01-10		2013-03-04	218	7w 4d	MERR	C57BL/6N;C57BL/6NTac	B6	5	B
MERR17.1e	WT	Wildtype	Male	2013-01-10		2013-03-04	155	7w 4d	MERR	C57BL/6N;C57BL/6NTac	B6	5	B
MERR19.1a	WT	Wildtype	Male	2013-01-10		2013-03-04	270	7w 4d	MERR	C57BL/6N;C57BL/6NTac	B6	5	B
MERR19.1c	WT	Wildtype	Male	2013-01-10		2013-03-04	255	7w 4d	MERR	C57BL/6N;C57BL/6NTac	B6	5	B
MERR22.1a	WT	Wildtype	Male	2013-01-10		2013-03-04	220	7w 4d	MERR	C57BL/6N;C57BL/6NTac	B6	5	B
MERR22.1b	WT	Wildtype	Male	2013-01-10		2013-03-04	240	7w 4d	MERR	C57BL/6N;C57BL/6NTac	B6	5	B
BCX1.2a	BC017643:Hom	Homozygous	Male	2012-12-26	BC017643	2013-03-04	215	9w 5d	BCX	C57BL/6N;C57BL/6NTac	B6	5	B
BCX1.2b	BC017643:Hom	Homozygous	Male	2012-12-26	BC017643	2013-03-04	160	9w 5d	BCX	C57BL/6N;C57BL/6NTac	B6	5	B
BCX1.2c	BC017643:Hom	Homozygous	Male	2012-12-26	BC017643	2013-03-04	130	9w 5d	BCX	C57BL/6N;C57BL/6NTac	B6	5	B
BCX6.1a	BC017643:Hom	Homozygous	Male	2013-01-08	BC017643	2013-03-04	158	7w 6d	BCX	C57BL/6N;C57BL/6NTac	B6	5	B
BCX6.1b	BC017643:Hom	Homozygous	Male	2013-01-08	BC017643	2013-03-04	230	7w 6d	BCX	C57BL/6N;C57BL/6NTac	B6	5	B
BCX6.1c	BC017643:Hom	Homozygous	Male	2013-01-08	BC017643	2013-03-04	205	7w 6d	BCX	C57BL/6N;C57BL/6NTac	B6	5	B
BCX6.1d	BC017643:Hom	Homozygous	Male	2013-01-08	BC017643	2013-03-04	164	7w 6d	BCX	C57BL/6N;C57BL/6NTac	B6	5	B
BCX6.1e	BC017643:Hom	Homozygous	Male	2013-01-08	BC017643	2013-03-04	65	7w 6d	BCX	C57BL/6N;C57BL/6NTac	B6	5	B
IDO1.3a	Ido1:Hom	Homozygous	Male	2013-01-08	Ido1	2013-03-04	300	7w 6d	IDO	C57BL/6N;C57BL/6NTac	B6	5	B
IDO1.3b	Ido1:Hom	Homozygous	Male	2013-01-08	Ido1	2013-03-04	223	7w 6d	IDO	C57BL/6N;C57BL/6NTac	B6	5	B
IDO1.3c	Ido1:Hom	Homozygous	Male	2013-01-08	Ido1	2013-03-04	240	7w 6d	IDO	C57BL/6N;C57BL/6NTac	B6	5	B
IDO1.3d	Ido1:Hom	Homozygous	Male	2013-01-08	Ido1	2013-03-04	250	7w 6d	IDO	C57BL/6N;C57BL/6NTac	B6	5	B
IDO1.3e	Ido1:Hom	Homozygous	Male	2013-01-08	Ido1	2013-03-04	180	7w 6d	IDO	C57BL/6N;C57BL/6NTac	B6	5	B
IDO1.3f	Ido1:Hom	Homozygous	Male	2013-01-08	Ido1	2013-03-04	260	7w 6d	IDO	C57BL/6N;C57BL/6NTac	B6	5	B
IDO1.3g	Ido1:Hom	Homozygous	Male	2013-01-08	Ido1	2013-03-04		7w 6d	IDO	C57BL/6N;C57BL/6NTac	B6	5	B	Excluded (as difficulty dosing)
IDO1.3h	Ido1:Hom	Homozygous	Male	2013-01-08	Ido1	2013-03-04	330	7w 6d	IDO	C57BL/6N;C57BL/6NTac	B6	5	B
IDO1.3i	Ido1:Hom	Homozygous	Male	2013-01-08	Ido1	2013-03-04	240	7w 6d	IDO	C57BL/6N;C57BL/6NTac	B6	5	B
IDO2.2a	Ido1:Hom	Homozygous	Male	2013-01-05	Ido1	2013-03-04	175	8w 2d	IDO	C57BL/6N;C57BL/6NTac	B6	5	B
MCTQ100.1b	WT	Wildtype	Male	2013-01-12		2013-03-11	240	8w 2d	MCTQ	C57BL/6N;C57BL/6NTac	B6	5	A
MCTQ100.1d	WT	Wildtype	Male	2013-01-12		2013-03-11	190	8w 2d	MCTQ	C57BL/6N;C57BL/6NTac	B6	5	A
MCTQ101.1a	WT	Wildtype	Male	2013-01-24		2013-03-11	220	6w 4d	MCTQ	C57BL/6N;C57BL/6NTac	B6	5	A
MCTQ103.1a	WT	Wildtype	Male	2013-01-17		2013-03-11	270	7w 4d	MCTQ	C57BL/6N;C57BL/6NTac	B6	5	A
MCTQ103.1b	WT	Wildtype	Male	2013-01-17		2013-03-11	260	7w 4d	MCTQ	C57BL/6N;C57BL/6NTac	B6	5	A
COPG4.2a	WT	Wildtype	Male	2013-01-20		2013-03-11	280	7w 1d	COPG	C57BL/6N;C57BL/6NTac	B6	5	A
COPG4.2b	WT	Wildtype	Male	2013-01-20		2013-03-11	165	7w 1d	COPG	C57BL/6N;C57BL/6NTac	B6	5	A
COPG4.2c	WT	Wildtype	Male	2013-01-20		2013-03-11	245	7w 1d	COPG	C57BL/6N;C57BL/6NTac	B6	5	A
IRFS10.1a	WT	Wildtype	Male	2013-01-07		2013-03-11	300	9w	IRFS	C57BL/6N;C57BL/6NTac	B6	5	A
IRFS5.2a	WT	Wildtype	Male	2013-01-11		2013-03-11	185	8w 3d	IRFS	C57BL/6N;C57BL/6NTac	B6	5	A
IRFS5.2b	WT	Wildtype	Male	2013-01-11		2013-03-11	235	8w 3d	IRFS	C57BL/6N;C57BL/6NTac	B6	5	A
IRFS5.2c	WT	Wildtype	Male	2013-01-11		2013-03-11	240	8w 3d	IRFS	C57BL/6N;C57BL/6NTac	B6	5	A
SPN15.1a	WT	Wildtype	Male	2013-01-12		2013-03-11	173	8w 2d	SPN	C57BL/6Brd-Tyr<c-Brd>;C57BL/6Dnk;C57BL/6N;C57BL/6NTac	B6	5	A
SPN15.1b	WT	Wildtype	Male	2013-01-12		2013-03-11	205	8w 2d	SPN	C57BL/6Brd-Tyr<c-Brd>;C57BL/6Dnk;C57BL/6N;C57BL/6NTac	B6	5	A
SPN15.1c	WT	Wildtype	Male	2013-01-12		2013-03-11		8w 2d	SPN	C57BL/6Brd-Tyr<c-Brd>;C57BL/6Dnk;C57BL/6N;C57BL/6NTac	B6	5	A	Excluded (as difficulty dosing)
SPN15.1d	WT	Wildtype	Male	2013-01-12		2013-03-11	130	8w 2d	SPN	C57BL/6Brd-Tyr<c-Brd>;C57BL/6Dnk;C57BL/6N;C57BL/6NTac	B6	5	A
SPN15.1e	WT	Wildtype	Male	2013-01-12		2013-03-11	170	8w 2d	SPN	C57BL/6Brd-Tyr<c-Brd>;C57BL/6Dnk;C57BL/6N;C57BL/6NTac	B6	5	A
SPN15.1f	WT	Wildtype	Male	2013-01-12		2013-03-11	195	8w 2d	SPN	C57BL/6Brd-Tyr<c-Brd>;C57BL/6Dnk;C57BL/6N;C57BL/6NTac	B6	5	A
MCTQ106.1a	Cbx6:Hom	Homozygous	Male	2013-01-10	Cbx6	2013-03-11	285	8w 4d	MCTQ	C57BL/6N;C57BL/6NTac	B6	5	A
MCTQ107.1d	Cbx6:Hom	Homozygous	Male	2013-01-17	Cbx6	2013-03-11	400	7w 4d	MCTQ	C57BL/6N;C57BL/6NTac	B6	5	A
ESP2.3b	Espn:Hom	Homozygous	Male	2013-01-14	Espn	2013-03-11	130	8w	ESP	C57BL/6N;C57BL/6NTac	B6	5	A
ESP2.3e	Espn:Hom	Homozygous	Male	2013-01-14	Espn	2013-03-11	240	8w	ESP	C57BL/6N;C57BL/6NTac	B6	5	A
MCTQ100.1a	Cbx6:Het	Heterozygous	Male	2013-01-12	Cbx6	2013-03-11	200	8w 2d	MCTQ	C57BL/6N;C57BL/6NTac	B6	5	A
MCTQ100.1c	Cbx6:Het	Heterozygous	Male	2013-01-12	Cbx6	2013-03-11	145	8w 2d	MCTQ	C57BL/6N;C57BL/6NTac	B6	5	A
MCTQ103.1d	Cbx6:Het	Heterozygous	Male	2013-01-17	Cbx6	2013-03-11	270	7w 4d	MCTQ	C57BL/6N;C57BL/6NTac	B6	5	A
MCTQ107.1b	Cbx6:Het	Heterozygous	Male	2013-01-17	Cbx6	2013-03-11	270	7w 4d	MCTQ	C57BL/6N;C57BL/6NTac	B6	5	A
ESP4.1a	Espn:Het	Heterozygous	Male	2013-01-17	Espn	2013-03-11	165	7w 4d	ESP	C57BL/6N;C57BL/6NTac	B6	5	A
ESP4.1b	Espn:Het	Heterozygous	Male	2013-01-17	Espn	2013-03-11	71	7w 4d	ESP	C57BL/6N;C57BL/6NTac	B6	5	A
ESP4.1c	Espn:Het	Heterozygous	Male	2013-01-17	Espn	2013-03-11	300	7w 4d	ESP	C57BL/6N;C57BL/6NTac	B6	5	A
MERW12.2c	WT	Wildtype	Female	2013-01-18		2013-03-11	340	7w 3d	MERW	C57BL/6N;C57BL/6NTac	B6	5	B
MERW12.2e	WT	Wildtype	Female	2013-01-18		2013-03-11	250	7w 3d	MERW	C57BL/6N;C57BL/6NTac	B6	5	B
MERW12.2i	WT	Wildtype	Female	2013-01-18		2013-03-11	120	7w 3d	MERW	C57BL/6N;C57BL/6NTac	B6	5	B
MERW12.2j	WT	Wildtype	Female	2013-01-18		2013-03-11	184	7w 3d	MERW	C57BL/6N;C57BL/6NTac	B6	5	B
MFCH11.3d	WT	Wildtype	Female	2013-01-15		2013-03-11	320	7w 6d	MFCH	C57BL/6N;C57BL/6NTac	B6	5	B
MFCH11.3e	WT	Wildtype	Female	2013-01-15		2013-03-11	330	7w 6d	MFCH	C57BL/6N;C57BL/6NTac	B6	5	B
MFCH11.3f	WT	Wildtype	Female	2013-01-15		2013-03-11	380	7w 6d	MFCH	C57BL/6N;C57BL/6NTac	B6	5	B
MFCH11.3g	WT	Wildtype	Female	2013-01-15		2013-03-11	290	7w 6d	MFCH	C57BL/6N;C57BL/6NTac	B6	5	B
MFCH11.3h	WT	Wildtype	Female	2013-01-15		2013-03-11	322	7w 6d	MFCH	C57BL/6N;C57BL/6NTac	B6	5	B
MFCH16.1f	WT	Wildtype	Female	2013-01-13		2013-03-11	310	8w 1d	MFCH	C57BL/6N;C57BL/6NTac	B6	5	B
MEFL21.2g	WT	Wildtype	Female	2013-01-18		2013-03-11	367	7w 3d	MEFL	C57BL/6N;C57BL/6NTac	B6	5	B
MEMX21.2e	WT	Wildtype	Female	2013-01-18		2013-03-11	365	7w 3d	MEMX	C57BL/6N;C57BL/6NTac	B6	5	B
MDXZ48.2a	Cmtm6:Hom	Homozygous	Female	2013-01-04	Cmtm6	2013-03-11	280	9w 3d	MDXZ	C57BL/6N;C57BL/6NTac	B6	5	B
MDXZ48.2b	Cmtm6:Hom	Homozygous	Female	2013-01-04	Cmtm6	2013-03-11	365	9w 3d	MDXZ	C57BL/6N;C57BL/6NTac	B6	5	B
MDXZ48.2c	Cmtm6:Hom	Homozygous	Female	2013-01-04	Cmtm6	2013-03-11	240	9w 3d	MDXZ	C57BL/6N;C57BL/6NTac	B6	5	B
MDXZ50.1e	Cmtm6:Hom	Homozygous	Female	2012-12-13	Cmtm6	2013-03-11	245	12w 4d	MDXZ	C57BL/6N;C57BL/6NTac	B6	5	B
MDXZ50.1f	Cmtm6:Hom	Homozygous	Female	2012-12-13	Cmtm6	2013-03-11	260	12w 4d	MDXZ	C57BL/6N;C57BL/6NTac	B6	5	B
MEPM25.1e	Cyp20a1:Hom	Homozygous	Female	2013-01-10	Cyp20a1	2013-03-11	290	8w 4d	MEPM	C57BL/6N;C57BL/6NTac	B6	5	B
MEPM25.1g	Cyp20a1:Hom	Homozygous	Female	2013-01-10	Cyp20a1	2013-03-11	260	8w 4d	MEPM	C57BL/6N;C57BL/6NTac	B6	5	B
MEPM27.1i	Cyp20a1:Hom	Homozygous	Female	2013-01-19	Cyp20a1	2013-03-11	275	7w 2d	MEPM	C57BL/6N;C57BL/6NTac	B6	5	B
MEPM28.1h	Cyp20a1:Hom	Homozygous	Female	2013-01-06	Cyp20a1	2013-03-11	280	9w 1d	MEPM	C57BL/6N;C57BL/6NTac	B6	5	B
MEPM30.1d	Cyp20a1:Hom	Homozygous	Female	2013-01-14	Cyp20a1	2013-03-11	390	8w	MEPM	C57BL/6N;C57BL/6NTac	B6	5	B
MEPM30.1e	Cyp20a1:Hom	Homozygous	Female	2013-01-14	Cyp20a1	2013-03-11	355	8w	MEPM	C57BL/6N;C57BL/6NTac	B6	5	B
MELC23.2g	Ttll11:Hom	Homozygous	Female	2013-01-13	Ttll11	2013-03-11	210	8w 1d	MELC	C57BL/6N;C57BL/6NTac	B6	5	B
MELC23.2h	Ttll11:Hom	Homozygous	Female	2013-01-13	Ttll11	2013-03-11	310	8w 1d	MELC	C57BL/6N;C57BL/6NTac	B6	5	B
MELC23.2i	Ttll11:Hom	Homozygous	Female	2013-01-13	Ttll11	2013-03-11	325	8w 1d	MELC	C57BL/6N;C57BL/6NTac	B6	5	B
MELC28.1h	Ttll11:Hom	Homozygous	Female	2013-01-05	Ttll11	2013-03-11	310	9w 2d	MELC	C57BL/6N;C57BL/6NTac	B6	5	B
MELC28.1i	Ttll11:Hom	Homozygous	Female	2013-01-05	Ttll11	2013-03-11	330	9w 2d	MELC	C57BL/6N;C57BL/6NTac	B6	5	B
MELC29.1f	Ttll11:Hom	Homozygous	Female	2013-01-03	Ttll11	2013-03-11	240	9w 4d	MELC	C57BL/6N;C57BL/6NTac	B6	5	B
MELC29.1g	Ttll11:Hom	Homozygous	Female	2013-01-03	Ttll11	2013-03-11	180	9w 4d	MELC	C57BL/6N;C57BL/6NTac	B6	5	B
MELC29.1h	Ttll11:Hom	Homozygous	Female	2013-01-03	Ttll11	2013-03-11	220	9w 4d	MELC	C57BL/6N;C57BL/6NTac	B6	5	B
MELC32.1e	Ttll11:Hom	Homozygous	Female	2013-01-07	Ttll11	2013-03-11	400	9w	MELC	C57BL/6N;C57BL/6NTac	B6	5	B
MELC32.1f	Ttll11:Hom	Homozygous	Female	2013-01-07	Ttll11	2013-03-11	220	9w	MELC	C57BL/6N;C57BL/6NTac	B6	5	B
MDCK120.4e	Cyfip1:Het	Heterozygous	Female	2013-01-11	Cyfip1	2013-03-11		8w 3d	MDCK	C57BL/6N;C57BL/6NTac	B6	5	B	Excluded (as difficulty dosing)
MDCK120.4f	Cyfip1:Het	Heterozygous	Female	2013-01-11	Cyfip1	2013-03-11	240	8w 3d	MDCK	C57BL/6N;C57BL/6NTac	B6	5	B
MDCK120.4g	Cyfip1:Het	Heterozygous	Female	2013-01-11	Cyfip1	2013-03-11	280	8w 3d	MDCK	C57BL/6N;C57BL/6NTac	B6	5	B
MDCK151.1b	Cyfip1:Het	Heterozygous	Female	2012-12-28	Cyfip1	2013-03-11	350	10w 3d	MDCK	C57BL/6N;C57BL/6NTac	B6	5	B
MDCK151.2f	Cyfip1:Het	Heterozygous	Female	2013-01-17	Cyfip1	2013-03-11	260	7w 4d	MDCK	C57BL/6N;C57BL/6NTac	B6	5	B
MEPG35.1d	WT	Wildtype	Female	2013-01-15		2013-03-11	285	7w 6d	MEPG	C57BL/6N;C57BL/6NTac	B6	5	C
MEPG35.1g	WT	Wildtype	Female	2013-01-15		2013-03-11	180	7w 6d	MEPG	C57BL/6N;C57BL/6NTac	B6	5	C
MEPG35.1h	WT	Wildtype	Female	2013-01-15		2013-03-11	240	7w 6d	MEPG	C57BL/6N;C57BL/6NTac	B6	5	C
MEPG35.1j	WT	Wildtype	Female	2013-01-15		2013-03-11	210	7w 6d	MEPG	C57BL/6N;C57BL/6NTac	B6	5	C
IRFS10.1d	WT	Wildtype	Female	2013-01-07		2013-03-11	230	9w	IRFS	C57BL/6N;C57BL/6NTac	B6	5	C
IRFS5.2d	WT	Wildtype	Female	2013-01-11		2013-03-11	160	8w 3d	IRFS	C57BL/6N;C57BL/6NTac	B6	5	C
IRFS5.2e	WT	Wildtype	Female	2013-01-11		2013-03-11	205	8w 3d	IRFS	C57BL/6N;C57BL/6NTac	B6	5	C
SPN15.1h	WT	Wildtype	Female	2013-01-12		2013-03-11	270	8w 2d	SPN	C57BL/6Brd-Tyr<c-Brd>;C57BL/6Dnk;C57BL/6N;C57BL/6NTac	B6	5	C
SPN15.1i	WT	Wildtype	Female	2013-01-12		2013-03-11	224	8w 2d	SPN	C57BL/6Brd-Tyr<c-Brd>;C57BL/6Dnk;C57BL/6N;C57BL/6NTac	B6	5	C
SPN15.1j	WT	Wildtype	Female	2013-01-12		2013-03-11	170	8w 2d	SPN	C57BL/6Brd-Tyr<c-Brd>;C57BL/6Dnk;C57BL/6N;C57BL/6NTac	B6	5	C
SPN15.1k	WT	Wildtype	Female	2013-01-12		2013-03-11	180	8w 2d	SPN	C57BL/6Brd-Tyr<c-Brd>;C57BL/6Dnk;C57BL/6N;C57BL/6NTac	B6	5	C
MDNJ39.2e	WT	Wildtype	Female	2013-01-16		2013-03-11	250	7w 5d	MDNJ	C57BL/6N;C57BL/6NTac	B6	5	C
MDNJ39.2f	WT	Wildtype	Female	2013-01-16		2013-03-11	260	7w 5d	MDNJ	C57BL/6N;C57BL/6NTac	B6	5	C
MELP32.2c	3110035E14Rik:Hom	Homozygous	Female	2013-01-18	3110035E14Rik	2013-03-11	290	7w 3d	MELP	C57BL/6N;C57BL/6NTac	B6	5	C
MELP32.2d	3110035E14Rik:Hom	Homozygous	Female	2013-01-18	3110035E14Rik	2013-03-11	220	7w 3d	MELP	C57BL/6N;C57BL/6NTac	B6	5	C
MELP32.2f	3110035E14Rik:Hom	Homozygous	Female	2013-01-18	3110035E14Rik	2013-03-11	250	7w 3d	MELP	C57BL/6N;C57BL/6NTac	B6	5	C
MELP32.2i	3110035E14Rik:Hom	Homozygous	Female	2013-01-18	3110035E14Rik	2013-03-11	260	7w 3d	MELP	C57BL/6N;C57BL/6NTac	B6	5	C
MELP32.2j	3110035E14Rik:Hom	Homozygous	Female	2013-01-18	3110035E14Rik	2013-03-11	275	7w 3d	MELP	C57BL/6N;C57BL/6NTac	B6	5	C
MELP36.2g	3110035E14Rik:Hom	Homozygous	Female	2012-12-26	3110035E14Rik	2013-03-11	140	10w 5d	MELP	C57BL/6N;C57BL/6NTac	B6	5	C
MCTQ106.1d	Cbx6:Hom	Homozygous	Female	2013-01-10	Cbx6	2013-03-11	213	8w 4d	MCTQ	C57BL/6N;C57BL/6NTac	B6	5	C
MCTQ107.1g	Cbx6:Hom	Homozygous	Female	2013-01-17	Cbx6	2013-03-11	300	7w 4d	MCTQ	C57BL/6N;C57BL/6NTac	B6	5	C
MFCA24.1c	Ccdc24:Hom	Homozygous	Female	2013-01-12	Ccdc24	2013-03-11	250	8w 2d	MFCA	C57BL/6N;C57BL/6NTac	B6	5	C
MFCA25.1e	Ccdc24:Hom	Homozygous	Female	2013-01-10	Ccdc24	2013-03-11	220	8w 4d	MFCA	C57BL/6N;C57BL/6NTac	B6	5	C
MFCA26.1c	Ccdc24:Hom	Homozygous	Female	2013-01-07	Ccdc24	2013-03-11	205	9w	MFCA	C57BL/6N;C57BL/6NTac	B6	5	C
MFCA27.1c	Ccdc24:Hom	Homozygous	Female	2013-01-10	Ccdc24	2013-03-11	200	8w 4d	MFCA	C57BL/6N;C57BL/6NTac	B6	5	C
MFCA27.1d	Ccdc24:Hom	Homozygous	Female	2013-01-10	Ccdc24	2013-03-11	205	8w 4d	MFCA	C57BL/6N;C57BL/6NTac	B6	5	C
MFCA29.1f	Ccdc24:Hom	Homozygous	Female	2013-01-21	Ccdc24	2013-03-11	228	7w	MFCA	C57BL/6N;C57BL/6NTac	B6	5	C
MEAM35.2f	Plxna2:Hom	Homozygous	Female	2013-01-18	Plxna2	2013-03-11	310	7w 3d	MEAM	C57BL/6N;C57BL/6NTac	B6	5	C
MEAM35.2g	Plxna2:Hom	Homozygous	Female	2013-01-18	Plxna2	2013-03-11	280	7w 3d	MEAM	C57BL/6N;C57BL/6NTac	B6	5	C
MEAM35.2h	Plxna2:Hom	Homozygous	Female	2013-01-18	Plxna2	2013-03-11	270	7w 3d	MEAM	C57BL/6N;C57BL/6NTac	B6	5	C
MEAM35.2i	Plxna2:Hom	Homozygous	Female	2013-01-18	Plxna2	2013-03-11	225	7w 3d	MEAM	C57BL/6N;C57BL/6NTac	B6	5	C
MEAM35.2j	Plxna2:Hom	Homozygous	Female	2013-01-18	Plxna2	2013-03-11	240	7w 3d	MEAM	C57BL/6N;C57BL/6NTac	B6	5	C
MEAM35.2l	Plxna2:Hom	Homozygous	Female	2013-01-18	Plxna2	2013-03-11	230	7w 3d	MEAM	C57BL/6N;C57BL/6NTac	B6	5	C
MCTQ100.1f	Cbx6:Het	Heterozygous	Female	2013-01-12	Cbx6	2013-03-11	280	8w 2d	MCTQ	C57BL/6N;C57BL/6NTac	B6	5	C
MCTQ108.1g	Cbx6:Het	Heterozygous	Female	2013-01-11	Cbx6	2013-03-11	190	8w 3d	MCTQ	C57BL/6N;C57BL/6NTac	B6	5	C
MCTQ108.1h	Cbx6:Het	Heterozygous	Female	2013-01-11	Cbx6	2013-03-11	215	8w 3d	MCTQ	C57BL/6N;C57BL/6NTac	B6	5	C
MEEN51.4g	WT	Wildtype	Female	2013-01-23		2013-03-18	235	7w 5d	MEEN	C57BL/6N;C57BL/6NTac	B6	5	A
MEEN51.4h	WT	Wildtype	Female	2013-01-23		2013-03-18	150	7w 5d	MEEN	C57BL/6N;C57BL/6NTac	B6	5	A
MEEN51.4k	WT	Wildtype	Female	2013-01-23		2013-03-18	300	7w 5d	MEEN	C57BL/6N;C57BL/6NTac	B6	5	A
MEEN51.4l	WT	Wildtype	Female	2013-01-23		2013-03-18	267	7w 5d	MEEN	C57BL/6N;C57BL/6NTac	B6	5	A
MEEN52.3g	WT	Wildtype	Female	2013-01-24		2013-03-18	290	7w 4d	MEEN	C57BL/6N;C57BL/6NTac	B6	5	A
MEEN52.3i	WT	Wildtype	Female	2013-01-24		2013-03-18	230	7w 4d	MEEN	C57BL/6N;C57BL/6NTac	B6	5	A
MDXN44.2d	WT	Wildtype	Female	2013-01-24		2013-03-18	250	7w 4d	MDXN	C57BL/6N;C57BL/6NTac	B6	5	A
MDXN44.2f	WT	Wildtype	Female	2013-01-24		2013-03-18	252	7w 4d	MDXN	C57BL/6N;C57BL/6NTac	B6	5	A
MDXN44.2g	WT	Wildtype	Female	2013-01-24		2013-03-18	290	7w 4d	MDXN	C57BL/6N;C57BL/6NTac	B6	5	A
MDXN47.2i	WT	Wildtype	Female	2013-01-23		2013-03-18	205	7w 5d	MDXN	C57BL/6N;C57BL/6NTac	B6	5	A
MDXN48.2d	WT	Wildtype	Female	2013-01-24		2013-03-18	320	7w 4d	MDXN	C57BL/6N;C57BL/6NTac	B6	5	A
MDXN48.2g	WT	Wildtype	Female	2013-01-24		2013-03-18	330	7w 4d	MDXN	C57BL/6N;C57BL/6NTac	B6	5	A
MEBK28.2g	WT	Wildtype	Female	2013-01-20		2013-03-18	223	8w 1d	MEBK	C57BL/6N;C57BL/6NTac	B6	5	A
MEBK28.2i	WT	Wildtype	Female	2013-01-20		2013-03-18	255	8w 1d	MEBK	C57BL/6N;C57BL/6NTac	B6	5	A
MEBK28.2m	WT	Wildtype	Female	2013-01-20		2013-03-18	240	8w 1d	MEBK	C57BL/6N;C57BL/6NTac	B6	5	A
MFHU25.1g	WT	Wildtype	Female	2013-01-18		2013-03-18	115	8w 3d	MFHU	C57BL/6N;C57BL/6NTac	B6	5	A
MFHU25.1i	WT	Wildtype	Female	2013-01-18		2013-03-18	250	8w 3d	MFHU	C57BL/6N;C57BL/6NTac	B6	5	A
MFHU25.1j	WT	Wildtype	Female	2013-01-18		2013-03-18	236	8w 3d	MFHU	C57BL/6N;C57BL/6NTac	B6	5	A
MECH27.3g	Ahcyl1:Hom	Homozygous	Female	2013-01-13	Ahcyl1	2013-03-18	175	9w 1d	MECH	C57BL/6N;C57BL/6NTac	B6	5	A
MECH31.2g	Ahcyl1:Hom	Homozygous	Female	2013-01-22	Ahcyl1	2013-03-18	280	7w 6d	MECH	C57BL/6N;C57BL/6NTac	B6	5	A
MECH31.2j	Ahcyl1:Hom	Homozygous	Female	2013-01-22	Ahcyl1	2013-03-18	290	7w 6d	MECH	C57BL/6N;C57BL/6NTac	B6	5	A
MECH33.2f	Ahcyl1:Hom	Homozygous	Female	2013-01-10	Ahcyl1	2013-03-18	180	9w 4d	MECH	C57BL/6N;C57BL/6NTac	B6	5	A
MECH35.2b	Ahcyl1:Hom	Homozygous	Female	2013-01-10	Ahcyl1	2013-03-18		9w 4d	MECH	C57BL/6N;C57BL/6NTac	B6	5	A	Excluded (as difficulty dosing)
MDVY41.3f	Pabpn1l:Hom	Homozygous	Female	2013-01-14	Pabpn1l	2013-03-18	275	9w	MDVY	C57BL/6N;C57BL/6NTac	B6	5	A
MDVY41.3g	Pabpn1l:Hom	Homozygous	Female	2013-01-14	Pabpn1l	2013-03-18	250	9w	MDVY	C57BL/6N;C57BL/6NTac	B6	5	A
MDVY41.3h	Pabpn1l:Hom	Homozygous	Female	2013-01-14	Pabpn1l	2013-03-18	170	9w	MDVY	C57BL/6N;C57BL/6NTac	B6	5	A
MDVY41.3i	Pabpn1l:Hom	Homozygous	Female	2013-01-14	Pabpn1l	2013-03-18	212	9w	MDVY	C57BL/6N;C57BL/6NTac	B6	5	A
MDVY41.3j	Pabpn1l:Hom	Homozygous	Female	2013-01-14	Pabpn1l	2013-03-18	290	9w	MDVY	C57BL/6N;C57BL/6NTac	B6	5	A
MDVY41.3k	Pabpn1l:Hom	Homozygous	Female	2013-01-14	Pabpn1l	2013-03-18	220	9w	MDVY	C57BL/6N;C57BL/6NTac	B6	5	A
MDVY51.1c	Pabpn1l:Hom	Homozygous	Female	2013-01-26	Pabpn1l	2013-03-18	230	7w 2d	MDVY	C57BL/6N;C57BL/6NTac	B6	5	A
MDVY53.2g	Pabpn1l:Hom	Homozygous	Female	2013-01-24	Pabpn1l	2013-03-18	220	7w 4d	MDVY	C57BL/6N;C57BL/6NTac	B6	5	A
MERN26.3d	Pfkfb4:Hom	Homozygous	Female	2013-01-15	Pfkfb4	2013-03-18	242	8w 6d	MERN	C57BL/6N;C57BL/6NTac	B6	5	A
MERN26.3e	Pfkfb4:Hom	Homozygous	Female	2013-01-15	Pfkfb4	2013-03-18	200	8w 6d	MERN	C57BL/6N;C57BL/6NTac	B6	5	A
MERN26.3f	Pfkfb4:Hom	Homozygous	Female	2013-01-15	Pfkfb4	2013-03-18	202	8w 6d	MERN	C57BL/6N;C57BL/6NTac	B6	5	A
MERN26.3g	Pfkfb4:Hom	Homozygous	Female	2013-01-15	Pfkfb4	2013-03-18	190	8w 6d	MERN	C57BL/6N;C57BL/6NTac	B6	5	A
MERN30.1b	Pfkfb4:Hom	Homozygous	Female	2013-01-26	Pfkfb4	2013-03-18	330	7w 2d	MERN	C57BL/6N;C57BL/6NTac	B6	5	A
MERN30.1c	Pfkfb4:Hom	Homozygous	Female	2013-01-26	Pfkfb4	2013-03-18	350	7w 2d	MERN	C57BL/6N;C57BL/6NTac	B6	5	A
MERN30.1d	Pfkfb4:Hom	Homozygous	Female	2013-01-26	Pfkfb4	2013-03-18	230	7w 2d	MERN	C57BL/6N;C57BL/6NTac	B6	5	A
MENA22.7e	Zfp719:Hom	Homozygous	Female	2013-01-26	Zfp719	2013-03-18		7w 2d	MENA	C57BL/6N;C57BL/6NTac	B6	5	A	Excluded (as difficulty dosing)
MENA22.7f	Zfp719:Hom	Homozygous	Female	2013-01-26	Zfp719	2013-03-18	360	7w 2d	MENA	C57BL/6N;C57BL/6NTac	B6	5	A
MENA24.3i	Zfp719:Hom	Homozygous	Female	2013-01-28	Zfp719	2013-03-18	355	7w	MENA	C57BL/6N;C57BL/6NTac	B6	5	A
RFTN13.1e	WT	Wildtype	Female	2013-01-25		2013-03-18	350	7w 3d	RFTN	C57BL/6N;C57BL/6NTac	B6	5	B
RFTN13.1f	WT	Wildtype	Female	2013-01-25		2013-03-18	370	7w 3d	RFTN	C57BL/6N;C57BL/6NTac	B6	5	B
RFTN13.1g	WT	Wildtype	Female	2013-01-25		2013-03-18	180	7w 3d	RFTN	C57BL/6N;C57BL/6NTac	B6	5	B
RFTN13.1h	WT	Wildtype	Female	2013-01-25		2013-03-18	200	7w 3d	RFTN	C57BL/6N;C57BL/6NTac	B6	5	B
RFTN13.1i	WT	Wildtype	Female	2013-01-25		2013-03-18	210	7w 3d	RFTN	C57BL/6N;C57BL/6NTac	B6	5	B
RFTN14.1e	WT	Wildtype	Female	2013-01-28		2013-03-18	324	7w	RFTN	C57BL/6N;C57BL/6NTac	B6	5	B
RFTN14.1f	WT	Wildtype	Female	2013-01-28		2013-03-18	390	7w	RFTN	C57BL/6N;C57BL/6NTac	B6	5	B
MDZV39.2f	WT	Wildtype	Female	2013-01-26		2013-03-18	325	7w 2d	MDZV	C57BL/6N;C57BL/6NTac	B6	5	B
MDZV39.2g	WT	Wildtype	Female	2013-01-26		2013-03-18	360	7w 2d	MDZV	C57BL/6N;C57BL/6NTac	B6	5	B
MDZV41.2e	WT	Wildtype	Female	2013-01-25		2013-03-18	295	7w 3d	MDZV	C57BL/6N;C57BL/6NTac	B6	5	B
MDZV41.2f	WT	Wildtype	Female	2013-01-25		2013-03-18	300	7w 3d	MDZV	C57BL/6N;C57BL/6NTac	B6	5	B
MDZV41.2g	WT	Wildtype	Female	2013-01-25		2013-03-18	320	7w 3d	MDZV	C57BL/6N;C57BL/6NTac	B6	5	B
MDYY47.1c	WT	Wildtype	Female	2013-01-20		2013-03-18	410	8w 1d	MDYY	C57BL/6N;C57BL/6NTac	B6	5	B
MDYY50.1f	WT	Wildtype	Female	2013-01-23		2013-03-18	450	7w 5d	MDYY	C57BL/6N;C57BL/6NTac	B6	5	B
MDYY50.1g	WT	Wildtype	Female	2013-01-23		2013-03-18	380	7w 5d	MDYY	C57BL/6N;C57BL/6NTac	B6	5	B
MDYY51.1c	WT	Wildtype	Female	2013-01-23		2013-03-18	335	7w 5d	MDYY	C57BL/6N;C57BL/6NTac	B6	5	B
MDYY51.1d	WT	Wildtype	Female	2013-01-23		2013-03-18	345	7w 5d	MDYY	C57BL/6N;C57BL/6NTac	B6	5	B
BCX1.3d	BC017643:Hom	Homozygous	Female	2013-01-28	BC017643	2013-03-18	160	7w	BCX	C57BL/6N;C57BL/6NTac	B6	5	B
BCX1.3e	BC017643:Hom	Homozygous	Female	2013-01-28	BC017643	2013-03-18	220	7w	BCX	C57BL/6N;C57BL/6NTac	B6	5	B
BCX1.3f	BC017643:Hom	Homozygous	Female	2013-01-28	BC017643	2013-03-18	155	7w	BCX	C57BL/6N;C57BL/6NTac	B6	5	B
BCX1.3g	BC017643:Hom	Homozygous	Female	2013-01-28	BC017643	2013-03-18	210	7w	BCX	C57BL/6N;C57BL/6NTac	B6	5	B
BCX1.3h	BC017643:Hom	Homozygous	Female	2013-01-28	BC017643	2013-03-18	222	7w	BCX	C57BL/6N;C57BL/6NTac	B6	5	B
BCX5.1a	BC017643:Hom	Homozygous	Female	2013-01-17	BC017643	2013-03-18	100	8w 4d	BCX	C57BL/6N;C57BL/6NTac	B6	5	B
MEYW22.2d	Cd300lg:Hom	Homozygous	Female	2013-01-18	Cd300lg	2013-03-18	171	8w 3d	MEYW	C57BL/6N;C57BL/6NTac	B6	5	B
MEYW22.2h	Cd300lg:Hom	Homozygous	Female	2013-01-18	Cd300lg	2013-03-18	195	8w 3d	MEYW	C57BL/6N;C57BL/6NTac	B6	5	B
MEYW22.2i	Cd300lg:Hom	Homozygous	Female	2013-01-18	Cd300lg	2013-03-18	270	8w 3d	MEYW	C57BL/6N;C57BL/6NTac	B6	5	B
MEYW23.2f	Cd300lg:Hom	Homozygous	Female	2013-01-20	Cd300lg	2013-03-18	340	8w 1d	MEYW	C57BL/6N;C57BL/6NTac	B6	5	B
MEYW23.2g	Cd300lg:Hom	Homozygous	Female	2013-01-20	Cd300lg	2013-03-18	155	8w 1d	MEYW	C57BL/6N;C57BL/6NTac	B6	5	B
MEYW23.2j	Cd300lg:Hom	Homozygous	Female	2013-01-20	Cd300lg	2013-03-18	300	8w 1d	MEYW	C57BL/6N;C57BL/6NTac	B6	5	B
MCZX70.2d	Coq4:Het	Heterozygous	Female	2013-01-21	Coq4	2013-03-18	170	8w	MCZX	C57BL/6N;C57BL/6NTac	B6	5	B
MCZX70.2g	Coq4:Het	Heterozygous	Female	2013-01-21	Coq4	2013-03-18	270	8w	MCZX	C57BL/6N;C57BL/6NTac	B6	5	B
MCZX71.2b	Coq4:Het	Heterozygous	Female	2013-01-21	Coq4	2013-03-18	130	8w	MCZX	C57BL/6N;C57BL/6NTac	B6	5	B
MCZX71.2f	Coq4:Het	Heterozygous	Female	2013-01-21	Coq4	2013-03-18	360	8w	MCZX	C57BL/6N;C57BL/6NTac	B6	5	B
MCZX71.2h	Coq4:Het	Heterozygous	Female	2013-01-21	Coq4	2013-03-18	320	8w	MCZX	C57BL/6N;C57BL/6NTac	B6	5	B
MCZX73.2d	Coq4:Het	Heterozygous	Female	2013-01-21	Coq4	2013-03-18	390	8w	MCZX	C57BL/6N;C57BL/6NTac	B6	5	B
MCZX74.3d	Coq4:Het	Heterozygous	Female	2013-01-24	Coq4	2013-03-18	340	7w 4d	MCZX	C57BL/6N;C57BL/6NTac	B6	5	B
MCZX75.2h	Coq4:Het	Heterozygous	Female	2013-01-21	Coq4	2013-03-18	295	8w	MCZX	C57BL/6N;C57BL/6NTac	B6	5	B
MCZX75.2i	Coq4:Het	Heterozygous	Female	2013-01-21	Coq4	2013-03-18	250	8w	MCZX	C57BL/6N;C57BL/6NTac	B6	5	B
MCZX75.2k	Coq4:Het	Heterozygous	Female	2013-01-21	Coq4	2013-03-18	300	8w	MCZX	C57BL/6N;C57BL/6NTac	B6	5	B
MEPZ19.3a	Ssbp1:Het	Heterozygous	Female	2013-01-14	Ssbp1	2013-03-18	350	9w	MEPZ	C57BL/6N;C57BL/6NTac	B6	5	B
MEPZ20.3i	Ssbp1:Het	Heterozygous	Female	2013-01-14	Ssbp1	2013-03-18	320	9w	MEPZ	C57BL/6N;C57BL/6NTac	B6	5	B
MEPZ20.3j	Ssbp1:Het	Heterozygous	Female	2013-01-14	Ssbp1	2013-03-18	220	9w	MEPZ	C57BL/6N;C57BL/6NTac	B6	5	B
MEPZ20.3l	Ssbp1:Het	Heterozygous	Female	2013-01-14	Ssbp1	2013-03-18	250	9w	MEPZ	C57BL/6N;C57BL/6NTac	B6	5	B
MEPZ26.1e	Ssbp1:Het	Heterozygous	Female	2013-01-21	Ssbp1	2013-03-18	270	8w	MEPZ	C57BL/6N;C57BL/6NTac	B6	5	B
MEPZ26.1f	Ssbp1:Het	Heterozygous	Female	2013-01-21	Ssbp1	2013-03-18	340	8w	MEPZ	C57BL/6N;C57BL/6NTac	B6	5	B
RFTN13.1a	WT	Wildtype	Male	2013-01-25		2013-03-18	280	7w 3d	RFTN	C57BL/6N;C57BL/6NTac	B6	5	C
RFTN13.1b	WT	Wildtype	Male	2013-01-25		2013-03-18	234	7w 3d	RFTN	C57BL/6N;C57BL/6NTac	B6	5	C
RFTN13.1c	WT	Wildtype	Male	2013-01-25		2013-03-18	350	7w 3d	RFTN	C57BL/6N;C57BL/6NTac	B6	5	C
RFTN13.1d	WT	Wildtype	Male	2013-01-25		2013-03-18	220	7w 3d	RFTN	C57BL/6N;C57BL/6NTac	B6	5	C
RFTN14.1a	WT	Wildtype	Male	2013-01-28		2013-03-18	200	7w	RFTN	C57BL/6N;C57BL/6NTac	B6	5	C
RFTN14.1b	WT	Wildtype	Male	2013-01-28		2013-03-18	167	7w	RFTN	C57BL/6N;C57BL/6NTac	B6	5	C
RFTN14.1c	WT	Wildtype	Male	2013-01-28		2013-03-18	210	7w	RFTN	C57BL/6N;C57BL/6NTac	B6	5	C
RFTN14.1d	WT	Wildtype	Male	2013-01-28		2013-03-18		7w	RFTN	C57BL/6N;C57BL/6NTac	B6	5	C	Excluded (as difficulty dosing)
MFKX15.1a	WT	Wildtype	Male	2013-01-23		2013-03-18	235	7w 5d	MFKX	C57BL/6N;C57BL/6NTac	B6	5	C
MFKX15.1b	WT	Wildtype	Male	2013-01-23		2013-03-18	216	7w 5d	MFKX	C57BL/6N;C57BL/6NTac	B6	5	C
MFKX15.1c	WT	Wildtype	Male	2013-01-23		2013-03-18	155	7w 5d	MFKX	C57BL/6N;C57BL/6NTac	B6	5	C
MFKX15.1d	WT	Wildtype	Male	2013-01-23		2013-03-18	145	7w 5d	MFKX	C57BL/6N;C57BL/6NTac	B6	5	C
MFKX15.1e	WT	Wildtype	Male	2013-01-23		2013-03-18	117	7w 5d	MFKX	C57BL/6N;C57BL/6NTac	B6	5	C
MESV30.1b	Usp24:Hom	Homozygous	Male	2013-01-14	Usp24	2013-03-18	265	9w	MESV	C57BL/6N;C57BL/6NTac	B6	5	C
MESV31.1a	Usp24:Hom	Homozygous	Male	2013-01-14	Usp24	2013-03-18	260	9w	MESV	C57BL/6N;C57BL/6NTac	B6	5	C
MESV33.1a	Usp24:Hom	Homozygous	Male	2013-01-28	Usp24	2013-03-18	300	7w	MESV	C57BL/6N;C57BL/6NTac	B6	5	C
MESV33.1b	Usp24:Hom	Homozygous	Male	2013-01-28	Usp24	2013-03-18	260	7w	MESV	C57BL/6N;C57BL/6NTac	B6	5	C
MESV33.1c	Usp24:Hom	Homozygous	Male	2013-01-28	Usp24	2013-03-18	280	7w	MESV	C57BL/6N;C57BL/6NTac	B6	5	C
MESV35.1a	Usp24:Hom	Homozygous	Male	2013-01-23	Usp24	2013-03-18	270	7w 5d	MESV	C57BL/6N;C57BL/6NTac	B6	5	C
MFJK18.2a	WT	Wildtype	Female	2013-01-29		2013-03-25	170	7w 6d	MFJK	C57BL/6N;C57BL/6NTac	B6	4	A
MFJK18.2b	WT	Wildtype	Female	2013-01-29		2013-03-25	190	7w 6d	MFJK	C57BL/6N;C57BL/6NTac	B6	4	A
MFJK18.2d	WT	Wildtype	Female	2013-01-29		2013-03-25	255	7w 6d	MFJK	C57BL/6N;C57BL/6NTac	B6	4	A
MFJK18.2e	WT	Wildtype	Female	2013-01-29		2013-03-25	170	7w 6d	MFJK	C57BL/6N;C57BL/6NTac	B6	4	A
MFJK18.2f	WT	Wildtype	Female	2013-01-29		2013-03-25	245	7w 6d	MFJK	C57BL/6N;C57BL/6NTac	B6	4	A
MFJK18.2h	WT	Wildtype	Female	2013-01-29		2013-03-25	39	7w 6d	MFJK	C57BL/6N;C57BL/6NTac	B6	4	A
MFJK18.2i	WT	Wildtype	Female	2013-01-29		2013-03-25	184	7w 6d	MFJK	C57BL/6N;C57BL/6NTac	B6	4	A
MFJK18.2j	WT	Wildtype	Female	2013-01-29		2013-03-25	139	7w 6d	MFJK	C57BL/6N;C57BL/6NTac	B6	4	A
MFJK21.2e	WT	Wildtype	Female	2013-01-28		2013-03-25	170	8w	MFJK	C57BL/6N;C57BL/6NTac	B6	4	A
MFJK21.2f	WT	Wildtype	Female	2013-01-28		2013-03-25	155	8w	MFJK	C57BL/6N;C57BL/6NTac	B6	4	A
NFK8.1i	WT	Wildtype	Female	2013-02-01		2013-03-25	213	7w 3d	NFK	C57BL/6Brd-Tyr<c-Brd>;C57BL/6Dnk;C57BL/6NTac	B6	4	A
NFK8.1k	WT	Wildtype	Female	2013-02-01		2013-03-25	158	7w 3d	NFK	C57BL/6Brd-Tyr<c-Brd>;C57BL/6Dnk;C57BL/6NTac	B6	4	A
SPN16.1b	WT	Wildtype	Female	2013-02-04		2013-03-25	120	7w	SPN	C57BL/6Brd-Tyr<c-Brd>;C57BL/6Dnk;C57BL/6N;C57BL/6NTac	B6	4	A
SPN16.1c	WT	Wildtype	Female	2013-02-04		2013-03-25		7w	SPN	C57BL/6Brd-Tyr<c-Brd>;C57BL/6Dnk;C57BL/6N;C57BL/6NTac	B6	4	A	Excluded (count <30 so presumed failed dosing)
NFK8.1g	Nfkb1:Hom	Homozygous	Female	2013-02-01	Nfkb1	2013-03-25	60	7w 3d	NFK	C57BL/6Brd-Tyr<c-Brd>;C57BL/6Dnk;C57BL/6NTac	B6	4	A
NFK8.1h	Nfkb1:Hom	Homozygous	Female	2013-02-01	Nfkb1	2013-03-25	184	7w 3d	NFK	C57BL/6Brd-Tyr<c-Brd>;C57BL/6Dnk;C57BL/6NTac	B6	4	A
NFK8.1j	Nfkb1:Hom	Homozygous	Female	2013-02-01	Nfkb1	2013-03-25	174	7w 3d	NFK	C57BL/6Brd-Tyr<c-Brd>;C57BL/6Dnk;C57BL/6NTac	B6	4	A
NFK8.1l	Nfkb1:Hom	Homozygous	Female	2013-02-01	Nfkb1	2013-03-25	180	7w 3d	NFK	C57BL/6Brd-Tyr<c-Brd>;C57BL/6Dnk;C57BL/6NTac	B6	4	A
MERW12.2d	Ccdc134:Het	Heterozygous	Female	2013-01-18	Ccdc134	2013-03-25	138	9w 3d	MERW	C57BL/6N;C57BL/6NTac	B6	4	A
MERW12.2f	Ccdc134:Het	Heterozygous	Female	2013-01-18	Ccdc134	2013-03-25	168	9w 3d	MERW	C57BL/6N;C57BL/6NTac	B6	4	A
MERW12.2g	Ccdc134:Het	Heterozygous	Female	2013-01-18	Ccdc134	2013-03-25	160	9w 3d	MERW	C57BL/6N;C57BL/6NTac	B6	4	A
MERW12.2h	Ccdc134:Het	Heterozygous	Female	2013-01-18	Ccdc134	2013-03-25	42	9w 3d	MERW	C57BL/6N;C57BL/6NTac	B6	4	A
MERW13.3d	Ccdc134:Het	Heterozygous	Female	2013-02-03	Ccdc134	2013-03-25	210	7w 1d	MERW	C57BL/6N;C57BL/6NTac	B6	4	A
MERW15.2e	Ccdc134:Het	Heterozygous	Female	2013-02-03	Ccdc134	2013-03-25	175	7w 1d	MERW	C57BL/6N;C57BL/6NTac	B6	4	A
MERW17.2b	Ccdc134:Het	Heterozygous	Female	2013-01-20	Ccdc134	2013-03-25	166	9w 1d	MERW	C57BL/6N;C57BL/6NTac	B6	4	A
MERW20.1e	Ccdc134:Het	Heterozygous	Female	2013-01-27	Ccdc134	2013-03-25	120	8w 1d	MERW	C57BL/6N;C57BL/6NTac	B6	4	A
MDZV38.2j	Sec22b:Het	Heterozygous	Female	2013-01-22	Sec22b	2013-03-25	114	8w 6d	MDZV	C57BL/6N;C57BL/6NTac	B6	4	A
MDZV38.2k	Sec22b:Het	Heterozygous	Female	2013-01-22	Sec22b	2013-03-25	106	8w 6d	MDZV	C57BL/6N;C57BL/6NTac	B6	4	A
MDZV38.2m	Sec22b:Het	Heterozygous	Female	2013-01-22	Sec22b	2013-03-25	113	8w 6d	MDZV	C57BL/6N;C57BL/6NTac	B6	4	A
MDZV39.2h	Sec22b:Het	Heterozygous	Female	2013-01-26	Sec22b	2013-03-25	175	8w 2d	MDZV	C57BL/6N;C57BL/6NTac	B6	4	A
MDZV39.2j	Sec22b:Het	Heterozygous	Female	2013-01-26	Sec22b	2013-03-25	157	8w 2d	MDZV	C57BL/6N;C57BL/6NTac	B6	4	A
MDZV41.2i	Sec22b:Het	Heterozygous	Female	2013-01-25	Sec22b	2013-03-25	178	8w 3d	MDZV	C57BL/6N;C57BL/6NTac	B6	4	A
MDZV42.2h	Sec22b:Het	Heterozygous	Female	2013-01-28	Sec22b	2013-03-25	210	8w	MDZV	C57BL/6N;C57BL/6NTac	B6	4	A
SPNB12.1d	Sptbn1:Het	Heterozygous	Female	2013-02-04	Sptbn1	2013-03-25	154	7w	SPNB	C57BL/6Brd-Tyr<c-Brd>;C57BL/6N;C57BL/6NTac	B6	4	A
MFFX13.1d	WT	Wildtype	Male	2013-01-01		2013-03-25		11w 6d	MFFX	C57BL/6N;C57BL/6NTac	B6	4	B
COPG5.1b	WT	Wildtype	Male	2013-02-02		2013-03-25	86	7w 2d	COPG	C57BL/6N;C57BL/6NTac	B6	4	B
GTF6.2a	WT	Wildtype	Male	2013-01-16		2013-03-25	100	8w 5d	GTF	C57BL/6N;C57BL/6NTac	B6	4	B
GTF6.2c	WT	Wildtype	Male	2013-01-16		2013-03-25	46	8w 5d	GTF	C57BL/6N;C57BL/6NTac	B6	4	B
GTF6.2d	WT	Wildtype	Male	2013-01-16		2013-03-25	18	8w 5d	GTF	C57BL/6N;C57BL/6NTac	B6	4	B
GTF9.1a	WT	Wildtype	Male	2013-01-30		2013-03-25	43	7w 5d	GTF	C57BL/6N;C57BL/6NTac	B6	4	B
GTF9.1c	WT	Wildtype	Male	2013-01-30		2013-03-25	42	7w 5d	GTF	C57BL/6N;C57BL/6NTac	B6	4	B
LIXO1.2a	WT	Wildtype	Male	2013-01-30		2013-03-25	143	7w 5d	LIXO	C57BL/6N;C57BL/6NTac	B6	4	B
LIXO1.2b	WT	Wildtype	Male	2013-01-30		2013-03-25	166	7w 5d	LIXO	C57BL/6N;C57BL/6NTac	B6	4	B
LIXO1.2c	WT	Wildtype	Male	2013-01-30		2013-03-25	50	7w 5d	LIXO	C57BL/6N;C57BL/6NTac	B6	4	B
MDYU33.2b	Dopey2:Hom	Homozygous	Male	2013-02-05	Dopey2	2013-03-25	114	6w 6d	DOPE	C57BL/6N;C57BL/6NTac	B6	4	B
MDYU35.1a	Dopey2:Hom	Homozygous	Male	2013-01-20	Dopey2	2013-03-25	100	9w 1d	DOPE	C57BL/6N;C57BL/6NTac	B6	4	B
MDYU35.1b	Dopey2:Hom	Homozygous	Male	2013-01-20	Dopey2	2013-03-25	87	9w 1d	DOPE	C57BL/6N;C57BL/6NTac	B6	4	B
MDYU35.1c	Dopey2:Hom	Homozygous	Male	2013-01-20	Dopey2	2013-03-25	140	9w 1d	DOPE	C57BL/6N;C57BL/6NTac	B6	4	B
COPG5.1a	Copg:Het	Heterozygous	Male	2013-02-02	Copg1	2013-03-25	78	7w 2d	COPG	C57BL/6N;C57BL/6NTac	B6	4	B
COPG5.1c	Copg:Het	Heterozygous	Male	2013-02-02	Copg1	2013-03-25	70	7w 2d	COPG	C57BL/6N;C57BL/6NTac	B6	4	B
COPG5.1d	Copg:Het	Heterozygous	Male	2013-02-02	Copg1	2013-03-25	96	7w 2d	COPG	C57BL/6N;C57BL/6NTac	B6	4	B
GTF6.2b	Gtf2a1:Het	Heterozygous	Male	2013-01-16	Gtf2a1	2013-03-25	42	8w 5d	GTF	C57BL/6N;C57BL/6NTac	B6	4	B
GTF6.2e	Gtf2a1:Het	Heterozygous	Male	2013-01-16	Gtf2a1	2013-03-25		8w 5d	GTF	C57BL/6N;C57BL/6NTac	B6	4	B	Excluded (as difficulty dosing)
GTF9.1b	Gtf2a1:Het	Heterozygous	Male	2013-01-30	Gtf2a1	2013-03-25	122	7w 5d	GTF	C57BL/6N;C57BL/6NTac	B6	4	B
IRFS11.1e	WT	Wildtype	Female	2013-02-08		2013-04-01	73	7w 3d	IRFS	C57BL/6N;C57BL/6NTac	B6	4	A
IRFS11.1f	WT	Wildtype	Female	2013-02-08		2013-04-01	106	7w 3d	IRFS	C57BL/6N;C57BL/6NTac	B6	4	A
IRFS11.1g	WT	Wildtype	Female	2013-02-08		2013-04-01	85	7w 3d	IRFS	C57BL/6N;C57BL/6NTac	B6	4	A
MEAV42.1a	WT	Wildtype	Female	2013-02-05		2013-04-01	250	7w 6d	MEAV	C57BL/6N;C57BL/6NTac	B6	4	A
MEAV43.1e	WT	Wildtype	Female	2013-02-05		2013-04-01	200	7w 6d	MEAV	C57BL/6N;C57BL/6NTac	B6	4	A
MEAV43.1f	WT	Wildtype	Female	2013-02-05		2013-04-01	190	7w 6d	MEAV	C57BL/6N;C57BL/6NTac	B6	4	A
MEAV45.1h	WT	Wildtype	Female	2013-02-03		2013-04-01	164	8w 1d	MEAV	C57BL/6N;C57BL/6NTac	B6	4	A
MEAV45.1i	WT	Wildtype	Female	2013-02-03		2013-04-01	230	8w 1d	MEAV	C57BL/6N;C57BL/6NTac	B6	4	A
MEAV48.1e	WT	Wildtype	Female	2013-02-03		2013-04-01	168	8w 1d	MEAV	C57BL/6N;C57BL/6NTac	B6	4	A
MDJL74.1d	WT	Wildtype	Female	2013-02-01		2013-04-01	180	8w 3d	MDJL	C57BL/6N;C57BL/6NTac	B6	4	A
MDJL74.1e	WT	Wildtype	Female	2013-02-01		2013-04-01	96	8w 3d	MDJL	C57BL/6N;C57BL/6NTac	B6	4	A
MDJL75.1c	WT	Wildtype	Female	2013-02-07		2013-04-01	188	7w 4d	MDJL	C57BL/6N;C57BL/6NTac	B6	4	A
MDJL75.1d	WT	Wildtype	Female	2013-02-07		2013-04-01	300	7w 4d	MDJL	C57BL/6N;C57BL/6NTac	B6	4	A
MDJL76.1i	WT	Wildtype	Female	2013-02-05		2013-04-01	110	7w 6d	MDJL	C57BL/6N;C57BL/6NTac	B6	4	A
MDJL76.1j	WT	Wildtype	Female	2013-02-05		2013-04-01	210	7w 6d	MDJL	C57BL/6N;C57BL/6NTac	B6	4	A
MEUK21.1e	Abcb6:Hom	Homozygous	Female	2013-02-09	Abcb6	2013-04-01	165	7w 2d	MEUK	C57BL/6N;C57BL/6NTac	B6	4	A
MEUK25.1b	Abcb6:Hom	Homozygous	Female	2013-02-03	Abcb6	2013-04-01	180	8w 1d	MEUK	C57BL/6N;C57BL/6NTac	B6	4	A
MEUK25.1c	Abcb6:Hom	Homozygous	Female	2013-02-03	Abcb6	2013-04-01	260	8w 1d	MEUK	C57BL/6N;C57BL/6NTac	B6	4	A
MEUK25.1e	Abcb6:Hom	Homozygous	Female	2013-02-03	Abcb6	2013-04-01	130	8w 1d	MEUK	C57BL/6N;C57BL/6NTac	B6	4	A
NBEA2.2e	Nbeal2:Hom	Homozygous	Female	2013-02-12	Nbeal2	2013-04-01	89	6w 6d	NBEA	C57BL/6N;C57BL/6NTac	B6	4	A
NBEA2.2g	Nbeal2:Hom	Homozygous	Female	2013-02-12	Nbeal2	2013-04-01	166	6w 6d	NBEA	C57BL/6N;C57BL/6NTac	B6	4	A
NBEA2.2i	Nbeal2:Hom	Homozygous	Female	2013-02-12	Nbeal2	2013-04-01	67	6w 6d	NBEA	C57BL/6N;C57BL/6NTac	B6	4	A
NBEA2.2j	Nbeal2:Hom	Homozygous	Female	2013-02-12	Nbeal2	2013-04-01	75	6w 6d	NBEA	C57BL/6N;C57BL/6NTac	B6	4	A
MECP28.3a	Reg3g:Hom	Homozygous	Female	2013-02-07	Reg3g	2013-04-01	179	7w 4d	MECP	C57BL/6N;C57BL/6NTac	B6	4	A
MECP28.3b	Reg3g:Hom	Homozygous	Female	2013-02-07	Reg3g	2013-04-01	126	7w 4d	MECP	C57BL/6N;C57BL/6NTac	B6	4	A
MECP28.3c	Reg3g:Hom	Homozygous	Female	2013-02-07	Reg3g	2013-04-01	166	7w 4d	MECP	C57BL/6N;C57BL/6NTac	B6	4	A
MECP28.3d	Reg3g:Hom	Homozygous	Female	2013-02-07	Reg3g	2013-04-01	205	7w 4d	MECP	C57BL/6N;C57BL/6NTac	B6	4	A
MECP28.3e	Reg3g:Hom	Homozygous	Female	2013-02-07	Reg3g	2013-04-01	185	7w 4d	MECP	C57BL/6N;C57BL/6NTac	B6	4	A
MECP28.3f	Reg3g:Hom	Homozygous	Female	2013-02-07	Reg3g	2013-04-01	210	7w 4d	MECP	C57BL/6N;C57BL/6NTac	B6	4	A
MECP28.3g	Reg3g:Hom	Homozygous	Female	2013-02-07	Reg3g	2013-04-01	232	7w 4d	MECP	C57BL/6N;C57BL/6NTac	B6	4	A
MECP32.2c	Reg3g:Hom	Homozygous	Female	2013-01-29	Reg3g	2013-04-01	186	8w 6d	MECP	C57BL/6N;C57BL/6NTac	B6	4	A
MECP32.2d	Reg3g:Hom	Homozygous	Female	2013-01-29	Reg3g	2013-04-01	209	8w 6d	MECP	C57BL/6N;C57BL/6NTac	B6	4	A
MDTX58.1d	Dmxl2:Het	Heterozygous	Female	2013-02-04	Dmxl2	2013-04-01	138	8w	MDTX	C57BL/6N;C57BL/6NTac	B6	4	A
MDTX58.1e	Dmxl2:Het	Heterozygous	Female	2013-02-04	Dmxl2	2013-04-01	185	8w	MDTX	C57BL/6N;C57BL/6NTac	B6	4	A
MDTX58.1h	Dmxl2:Het	Heterozygous	Female	2013-02-04	Dmxl2	2013-04-01	106	8w	MDTX	C57BL/6N;C57BL/6NTac	B6	4	A
MDTX61.1f	Dmxl2:Het	Heterozygous	Female	2013-02-07	Dmxl2	2013-04-01	130	7w 4d	MDTX	C57BL/6N;C57BL/6NTac	B6	4	A
MDTX61.1g	Dmxl2:Het	Heterozygous	Female	2013-02-07	Dmxl2	2013-04-01		7w 4d	MDTX	C57BL/6N;C57BL/6NTac	B6	4	A	Excluded (as difficulty dosing)
MDTX62.1c	Dmxl2:Het	Heterozygous	Female	2013-02-07	Dmxl2	2013-04-01	165	7w 4d	MDTX	C57BL/6N;C57BL/6NTac	B6	4	A
MDTX62.1f	Dmxl2:Het	Heterozygous	Female	2013-02-07	Dmxl2	2013-04-01	175	7w 4d	MDTX	C57BL/6N;C57BL/6NTac	B6	4	A
MEUP20.3h	WT	Wildtype	Female	2013-02-04		2013-04-01	210	8w	MEUP	C57BL/6N;C57BL/6NTac	B6	4	B
MEUP20.3j	WT	Wildtype	Female	2013-02-04		2013-04-01		8w	MEUP	C57BL/6N;C57BL/6NTac	B6	4	B	Excluded (as difficulty dosing)
MEUP21.1h	WT	Wildtype	Female	2013-02-06		2013-04-01	214	7w 5d	MEUP	C57BL/6N;C57BL/6NTac	B6	4	B
MEUP22.1f	WT	Wildtype	Female	2013-02-05		2013-04-01	150	7w 6d	MEUP	C57BL/6N;C57BL/6NTac	B6	4	B
MEUP22.1g	WT	Wildtype	Female	2013-02-05		2013-04-01	172	7w 6d	MEUP	C57BL/6N;C57BL/6NTac	B6	4	B
MEUP22.1h	WT	Wildtype	Female	2013-02-05		2013-04-01	105	7w 6d	MEUP	C57BL/6N;C57BL/6NTac	B6	4	B
MAP5.1f	WT	Wildtype	Female	2013-02-06		2013-04-01	205	7w 5d	MAP	C57BL/6N;C57BL/6NTac	B6	4	B
MAP5.1h	WT	Wildtype	Female	2013-02-06		2013-04-01	280	7w 5d	MAP	C57BL/6N;C57BL/6NTac	B6	4	B
MAP5.1i	WT	Wildtype	Female	2013-02-06		2013-04-01	225	7w 5d	MAP	C57BL/6N;C57BL/6NTac	B6	4	B
MAP9.1e	WT	Wildtype	Female	2013-02-10		2013-04-01	217	7w 1d	MAP	C57BL/6N;C57BL/6NTac	B6	4	B
MAP9.1f	WT	Wildtype	Female	2013-02-10		2013-04-01	300	7w 1d	MAP	C57BL/6N;C57BL/6NTac	B6	4	B
MAP9.1g	WT	Wildtype	Female	2013-02-10		2013-04-01	230	7w 1d	MAP	C57BL/6N;C57BL/6NTac	B6	4	B
SPNB10.1d	WT	Wildtype	Female	2013-01-29		2013-04-01	100	8w 6d	SPNB	C57BL/6Brd-Tyr<c-Brd>;C57BL/6N;C57BL/6NTac	B6	4	B
SPNB10.1f	WT	Wildtype	Female	2013-01-29		2013-04-01	167	8w 6d	SPNB	C57BL/6Brd-Tyr<c-Brd>;C57BL/6N;C57BL/6NTac	B6	4	B
SPNB10.1g	WT	Wildtype	Female	2013-01-29		2013-04-01	116	8w 6d	SPNB	C57BL/6Brd-Tyr<c-Brd>;C57BL/6N;C57BL/6NTac	B6	4	B
SPNB10.1h	WT	Wildtype	Female	2013-01-29		2013-04-01	170	8w 6d	SPNB	C57BL/6Brd-Tyr<c-Brd>;C57BL/6N;C57BL/6NTac	B6	4	B
SPNB11.1e	WT	Wildtype	Female	2013-01-31		2013-04-01	75	8w 4d	SPNB	C57BL/6Brd-Tyr<c-Brd>;C57BL/6N;C57BL/6NTac	B6	4	B
SPNB11.1f	WT	Wildtype	Female	2013-01-31		2013-04-01	175	8w 4d	SPNB	C57BL/6Brd-Tyr<c-Brd>;C57BL/6N;C57BL/6NTac	B6	4	B
SPNB12.1e	WT	Wildtype	Female	2013-02-04		2013-04-01	92	8w	SPNB	C57BL/6Brd-Tyr<c-Brd>;C57BL/6N;C57BL/6NTac	B6	4	B
SPNB8.1e	WT	Wildtype	Female	2013-02-10		2013-04-01	200	7w 1d	SPNB	C57BL/6Brd-Tyr<c-Brd>;C57BL/6N	B6	4	B
MEXX20.4d	Def6:Hom	Homozygous	Female	2013-01-27	Def6	2013-04-01	224	9w 1d	MEXX	C57BL/6N;C57BL/6NTac	B6	4	B
MEXX25.2d	Def6:Hom	Homozygous	Female	2013-02-10	Def6	2013-04-01	270	7w 1d	MEXX	C57BL/6N;C57BL/6NTac	B6	4	B
MEXX25.2f	Def6:Hom	Homozygous	Female	2013-02-10	Def6	2013-04-01	155	7w 1d	MEXX	C57BL/6N;C57BL/6NTac	B6	4	B
MEXX25.2g	Def6:Hom	Homozygous	Female	2013-02-10	Def6	2013-04-01	158	7w 1d	MEXX	C57BL/6N;C57BL/6NTac	B6	4	B
HACL3.1e	Hacl1:Hom	Homozygous	Female	2013-01-23	Hacl1	2013-04-01	100	9w 5d	HACL	C57BL/6N;C57BL/6NTac	B6	4	B
HACL3.1f	Hacl1:Hom	Homozygous	Female	2013-01-23	Hacl1	2013-04-01	101	9w 5d	HACL	C57BL/6N;C57BL/6NTac	B6	4	B
HACL3.1g	Hacl1:Hom	Homozygous	Female	2013-01-23	Hacl1	2013-04-01	175	9w 5d	HACL	C57BL/6N;C57BL/6NTac	B6	4	B
HACL5.1c	Hacl1:Hom	Homozygous	Female	2013-02-13	Hacl1	2013-04-01	218	6w 5d	HACL	C57BL/6N;C57BL/6NTac	B6	4	B
MEUY23.3c	Spink10:Hom	Homozygous	Female	2013-01-28	Spink10	2013-04-01	175	9w	MEUY	C57BL/6N;C57BL/6NTac	B6	4	B
MEUY23.3d	Spink10:Hom	Homozygous	Female	2013-01-28	Spink10	2013-04-01	156	9w	MEUY	C57BL/6N;C57BL/6NTac	B6	4	B
MEUY23.3e	Spink10:Hom	Homozygous	Female	2013-01-28	Spink10	2013-04-01	120	9w	MEUY	C57BL/6N;C57BL/6NTac	B6	4	B
MEUY25.3d	Spink10:Hom	Homozygous	Female	2013-02-14	Spink10	2013-04-01	92	6w 4d	MEUY	C57BL/6N;C57BL/6NTac	B6	4	B
MEUY25.3e	Spink10:Hom	Homozygous	Female	2013-02-14	Spink10	2013-04-01	140	6w 4d	MEUY	C57BL/6N;C57BL/6NTac	B6	4	B
MDRZ43.2d	Gbf1:Het	Heterozygous	Female	2013-02-08	Gbf1	2013-04-01	300	7w 3d	MDRZ	C57BL/6N;C57BL/6NTac	B6	4	B
MDRZ43.2g	Gbf1:Het	Heterozygous	Female	2013-02-08	Gbf1	2013-04-01	100	7w 3d	MDRZ	C57BL/6N;C57BL/6NTac	B6	4	B
MDRZ43.2h	Gbf1:Het	Heterozygous	Female	2013-02-08	Gbf1	2013-04-01	200	7w 3d	MDRZ	C57BL/6N;C57BL/6NTac	B6	4	B
MDRZ43.2i	Gbf1:Het	Heterozygous	Female	2013-02-08	Gbf1	2013-04-01	220	7w 3d	MDRZ	C57BL/6N;C57BL/6NTac	B6	4	B
SPNB10.1e	Sptbn1:Het	Heterozygous	Female	2013-01-29	Sptbn1	2013-04-01	158	8w 6d	SPNB	C57BL/6Brd-Tyr<c-Brd>;C57BL/6N;C57BL/6NTac	B6	4	B
SPNB11.1c	Sptbn1:Het	Heterozygous	Female	2013-01-31	Sptbn1	2013-04-01	130	8w 4d	SPNB	C57BL/6Brd-Tyr<c-Brd>;C57BL/6N;C57BL/6NTac	B6	4	B
SPNB11.1d	Sptbn1:Het	Heterozygous	Female	2013-01-31	Sptbn1	2013-04-01	178	8w 4d	SPNB	C57BL/6Brd-Tyr<c-Brd>;C57BL/6N;C57BL/6NTac	B6	4	B
SPNB11.1g	Sptbn1:Het	Heterozygous	Female	2013-01-31	Sptbn1	2013-04-01	160	8w 4d	SPNB	C57BL/6Brd-Tyr<c-Brd>;C57BL/6N;C57BL/6NTac	B6	4	B
SPNB11.1h	Sptbn1:Het	Heterozygous	Female	2013-01-31	Sptbn1	2013-04-01	200	8w 4d	SPNB	C57BL/6Brd-Tyr<c-Brd>;C57BL/6N;C57BL/6NTac	B6	4	B
SPNB8.1f	Sptbn1:Het	Heterozygous	Female	2013-02-10	Sptbn1	2013-04-01	120	7w 1d	SPNB	C57BL/6Brd-Tyr<c-Brd>;C57BL/6N	B6	4	B
SPNB8.1g	Sptbn1:Het	Heterozygous	Female	2013-02-10	Sptbn1	2013-04-01	75	7w 1d	SPNB	C57BL/6Brd-Tyr<c-Brd>;C57BL/6N	B6	4	B
MEQJ31.1a	WT	Wildtype	Male	2013-02-07		2013-04-01	163	7w 4d	MEQJ	C57BL/6N;C57BL/6NTac	B6	4	C
IRFS11.1a	WT	Wildtype	Male	2013-02-08		2013-04-01	85	7w 3d	IRFS	C57BL/6N;C57BL/6NTac	B6	4	C
IRFS11.1b	WT	Wildtype	Male	2013-02-08		2013-04-01	91	7w 3d	IRFS	C57BL/6N;C57BL/6NTac	B6	4	C
IRFS11.1c	WT	Wildtype	Male	2013-02-08		2013-04-01	128	7w 3d	IRFS	C57BL/6N;C57BL/6NTac	B6	4	C
IRFS11.1d	WT	Wildtype	Male	2013-02-08		2013-04-01	80	7w 3d	IRFS	C57BL/6N;C57BL/6NTac	B6	4	C
IRFS6.3a	WT	Wildtype	Male	2013-02-02		2013-04-01	88	8w 2d	IRFS	C57BL/6N;C57BL/6NTac	B6	4	C
IRFS6.3b	WT	Wildtype	Male	2013-02-02		2013-04-01	154	8w 2d	IRFS	C57BL/6N;C57BL/6NTac	B6	4	C
IRFS6.3c	WT	Wildtype	Male	2013-02-02		2013-04-01		8w 2d	IRFS	C57BL/6N;C57BL/6NTac	B6	4	C	Excluded (count <30 so presumed failed dosing)
IRFS6.3d	WT	Wildtype	Male	2013-02-02		2013-04-01		8w 2d	IRFS	C57BL/6N;C57BL/6NTac	B6	4	C	Excluded (count <30 so presumed failed dosing)
IRFS6.3e	WT	Wildtype	Male	2013-02-02		2013-04-01	92	8w 2d	IRFS	C57BL/6N;C57BL/6NTac	B6	4	C
MAP5.1e	WT	Wildtype	Male	2013-02-06		2013-04-01	156	7w 5d	MAP	C57BL/6N;C57BL/6NTac	B6	4	C
MAP9.1a	WT	Wildtype	Male	2013-02-10		2013-04-01	119	7w 1d	MAP	C57BL/6N;C57BL/6NTac	B6	4	C
MAP9.1b	WT	Wildtype	Male	2013-02-10		2013-04-01	130	7w 1d	MAP	C57BL/6N;C57BL/6NTac	B6	4	C
SPNB10.1b	WT	Wildtype	Male	2013-01-29		2013-04-01	124	8w 6d	SPNB	C57BL/6Brd-Tyr<c-Brd>;C57BL/6N;C57BL/6NTac	B6	4	C
SPNB10.1c	WT	Wildtype	Male	2013-01-29		2013-04-01	106	8w 6d	SPNB	C57BL/6Brd-Tyr<c-Brd>;C57BL/6N;C57BL/6NTac	B6	4	C
SPNB11.1a	WT	Wildtype	Male	2013-01-31		2013-04-01	78	8w 4d	SPNB	C57BL/6Brd-Tyr<c-Brd>;C57BL/6N;C57BL/6NTac	B6	4	C
SPNB8.1b	WT	Wildtype	Male	2013-02-10		2013-04-01	65	7w 1d	SPNB	C57BL/6Brd-Tyr<c-Brd>;C57BL/6N	B6	4	C
SPNB8.1d	WT	Wildtype	Male	2013-02-10		2013-04-01	88	7w 1d	SPNB	C57BL/6Brd-Tyr<c-Brd>;C57BL/6N	B6	4	C
MEQJ27.2a	Erp44:Het	Heterozygous	Male	2013-02-06	Erp44	2013-04-01	113	7w 5d	MEQJ	C57BL/6N;C57BL/6NTac	B6	4	C
MEQJ27.2c	Erp44:Het	Heterozygous	Male	2013-02-06	Erp44	2013-04-01	72	7w 5d	MEQJ	C57BL/6N;C57BL/6NTac	B6	4	C
MEQJ27.2e	Erp44:Het	Heterozygous	Male	2013-02-06	Erp44	2013-04-01	90	7w 5d	MEQJ	C57BL/6N;C57BL/6NTac	B6	4	C
MEQJ31.1b	Erp44:Het	Heterozygous	Male	2013-02-07	Erp44	2013-04-01	149	7w 4d	MEQJ	C57BL/6N;C57BL/6NTac	B6	4	C
MEQJ31.1c	Erp44:Het	Heterozygous	Male	2013-02-07	Erp44	2013-04-01	137	7w 4d	MEQJ	C57BL/6N;C57BL/6NTac	B6	4	C
MAP5.1a	Map3k1:Het	Heterozygous	Male	2013-02-06	Map3k1	2013-04-01	108	7w 5d	MAP	C57BL/6N;C57BL/6NTac	B6	4	C
MAP5.1b	Map3k1:Het	Heterozygous	Male	2013-02-06	Map3k1	2013-04-01	160	7w 5d	MAP	C57BL/6N;C57BL/6NTac	B6	4	C
MAP5.1c	Map3k1:Het	Heterozygous	Male	2013-02-06	Map3k1	2013-04-01	86	7w 5d	MAP	C57BL/6N;C57BL/6NTac	B6	4	C
MAP5.1d	Map3k1:Het	Heterozygous	Male	2013-02-06	Map3k1	2013-04-01	134	7w 5d	MAP	C57BL/6N;C57BL/6NTac	B6	4	C
SPNB10.1a	Sptbn1:Het	Heterozygous	Male	2013-01-29	Sptbn1	2013-04-01	60	8w 6d	SPNB	C57BL/6Brd-Tyr<c-Brd>;C57BL/6N;C57BL/6NTac	B6	4	C
SPNB11.1b	Sptbn1:Het	Heterozygous	Male	2013-01-31	Sptbn1	2013-04-01	50	8w 4d	SPNB	C57BL/6Brd-Tyr<c-Brd>;C57BL/6N;C57BL/6NTac	B6	4	C
SPNB8.1a	Sptbn1:Het	Heterozygous	Male	2013-02-10	Sptbn1	2013-04-01	135	7w 1d	SPNB	C57BL/6Brd-Tyr<c-Brd>;C57BL/6N	B6	4	C
SPNB8.1c	Sptbn1:Het	Heterozygous	Male	2013-02-10	Sptbn1	2013-04-01	94	7w 1d	SPNB	C57BL/6Brd-Tyr<c-Brd>;C57BL/6N	B6	4	C
MFEY16.1c	WT	Wildtype	Female	2013-02-10		2013-04-08	145	8w 1d	MFEY	C57BL/6N;C57BL/6NTac	B6	4	A
MFEY16.1d	WT	Wildtype	Female	2013-02-10		2013-04-08	167	8w 1d	MFEY	C57BL/6N;C57BL/6NTac	B6	4	A
MFEY17.1e	WT	Wildtype	Female	2013-02-10		2013-04-08	112	8w 1d	MFEY	C57BL/6N;C57BL/6NTac	B6	4	A
MFEY17.1f	WT	Wildtype	Female	2013-02-10		2013-04-08	155	8w 1d	MFEY	C57BL/6N;C57BL/6NTac	B6	4	A
MFEY17.1i	WT	Wildtype	Female	2013-02-10		2013-04-08	150	8w 1d	MFEY	C57BL/6N;C57BL/6NTac	B6	4	A
MFET24.1d	WT	Wildtype	Female	2013-02-10		2013-04-08	115	8w 1d	MFET	C57BL/6N;C57BL/6NTac	B6	4	A
METX20.3c	WT	Wildtype	Female	2013-02-17		2013-04-08	225	7w 1d	METX	C57BL/6N;C57BL/6NTac	B6	4	A
METX20.3f	WT	Wildtype	Female	2013-02-17		2013-04-08	118	7w 1d	METX	C57BL/6N;C57BL/6NTac	B6	4	A
METX26.2e	WT	Wildtype	Female	2013-02-11		2013-04-08	150	8w	METX	C57BL/6N;C57BL/6NTac	B6	4	A
METX32.2c	WT	Wildtype	Female	2013-02-11		2013-04-08		8w	METX	C57BL/6N;C57BL/6NTac	B6	4	A	Excluded (count <30 so presumed failed dosing)
METX32.2f	WT	Wildtype	Female	2013-02-11		2013-04-08	170	8w	METX	C57BL/6N;C57BL/6NTac	B6	4	A
METX32.2h	WT	Wildtype	Female	2013-02-11		2013-04-08	196	8w	METX	C57BL/6N;C57BL/6NTac	B6	4	A
IRFS13.1a	WT	Wildtype	Female	2013-02-12		2013-04-08	77	7w 6d	IRFS	C57BL/6N;C57BL/6NTac	B6	4	A
IRFS13.1c	WT	Wildtype	Female	2013-02-12		2013-04-08	136	7w 6d	IRFS	C57BL/6N;C57BL/6NTac	B6	4	A
IRFS15.1e	WT	Wildtype	Female	2013-02-10		2013-04-08	95	8w 1d	IRFS	C57BL/6N;C57BL/6NTac	B6	4	A
IRFS15.1g	WT	Wildtype	Female	2013-02-10		2013-04-08	70	8w 1d	IRFS	C57BL/6N;C57BL/6NTac	B6	4	A
IRFS16.1g	WT	Wildtype	Female	2013-02-12		2013-04-08	124	7w 6d	IRFS	C57BL/6N;C57BL/6NTac	B6	4	A
END3.3d	Entpd1:Hom	Homozygous	Female	2013-02-08	Entpd1	2013-04-08	190	8w 3d	END	C57BL/6Dnk	B6	4	A
END4.1b	Entpd1:Hom	Homozygous	Female	2013-02-10	Entpd1	2013-04-08	93	8w 1d	END	C57BL/6Dnk	B6	4	A
END4.1c	Entpd1:Hom	Homozygous	Female	2013-02-10	Entpd1	2013-04-08		8w 1d	END	C57BL/6Dnk	B6	4	A	Excluded (as difficulty dosing)
END4.1e	Entpd1:Hom	Homozygous	Female	2013-02-10	Entpd1	2013-04-08	96	8w 1d	END	C57BL/6Dnk	B6	4	A
END4.1h	Entpd1:Hom	Homozygous	Female	2013-02-10	Entpd1	2013-04-08	175	8w 1d	END	C57BL/6Dnk	B6	4	A
MEEB24.1h	Gm648:Hom	Homozygous	Female	2013-02-16	Gm648	2013-04-08	108	7w 2d	MEEB	C57BL/6N;C57BL/6NTac	B6	4	A
MEEB25.1d	Gm648:Hom	Homozygous	Female	2013-02-18	Gm648	2013-04-08	43	7w	MEEB	C57BL/6N;C57BL/6NTac	B6	4	A
MEEB25.1e	Gm648:Hom	Homozygous	Female	2013-02-18	Gm648	2013-04-08	170	7w	MEEB	C57BL/6N;C57BL/6NTac	B6	4	A
MEEB28.1c	Gm648:Hom	Homozygous	Female	2013-02-15	Gm648	2013-04-08	100	7w 3d	MEEB	C57BL/6N;C57BL/6NTac	B6	4	A
MEEB28.1d	Gm648:Hom	Homozygous	Female	2013-02-15	Gm648	2013-04-08	55	7w 3d	MEEB	C57BL/6N;C57BL/6NTac	B6	4	A
MEEB28.1e	Gm648:Hom	Homozygous	Female	2013-02-15	Gm648	2013-04-08	120	7w 3d	MEEB	C57BL/6N;C57BL/6NTac	B6	4	A
MEEB28.1f	Gm648:Hom	Homozygous	Female	2013-02-15	Gm648	2013-04-08	99	7w 3d	MEEB	C57BL/6N;C57BL/6NTac	B6	4	A
MEEB28.1g	Gm648:Hom	Homozygous	Female	2013-02-15	Gm648	2013-04-08	138	7w 3d	MEEB	C57BL/6N;C57BL/6NTac	B6	4	A
MEEB28.1h	Gm648:Hom	Homozygous	Female	2013-02-15	Gm648	2013-04-08	90	7w 3d	MEEB	C57BL/6N;C57BL/6NTac	B6	4	A
IRFS13.1d	Irf7:Hom	Homozygous	Female	2013-02-12	Irf7	2013-04-08	145	7w 6d	IRFS	C57BL/6N;C57BL/6NTac	B6	4	A
IRFS14.1g	Irf7:Hom	Homozygous	Female	2013-02-09	Irf7	2013-04-08	212	8w 2d	IRFS	C57BL/6N;C57BL/6NTac	B6	4	A
IRFS15.1d	Irf7:Hom	Homozygous	Female	2013-02-10	Irf7	2013-04-08	185	8w 1d	IRFS	C57BL/6N;C57BL/6NTac	B6	4	A
IRFS15.1f	Irf7:Hom	Homozygous	Female	2013-02-10	Irf7	2013-04-08	200	8w 1d	IRFS	C57BL/6N;C57BL/6NTac	B6	4	A
MEQW19.1j	Naaa:Hom	Homozygous	Female	2013-02-14	Naaa	2013-04-08	122	7w 4d	MEQW	C57BL/6N;C57BL/6NTac	B6	4	A
MEQW19.1l	Naaa:Hom	Homozygous	Female	2013-02-14	Naaa	2013-04-08	166	7w 4d	MEQW	C57BL/6N;C57BL/6NTac	B6	4	A
MEQW19.1m	Naaa:Hom	Homozygous	Female	2013-02-14	Naaa	2013-04-08	180	7w 4d	MEQW	C57BL/6N;C57BL/6NTac	B6	4	A
MEQW19.1n	Naaa:Hom	Homozygous	Female	2013-02-14	Naaa	2013-04-08	112	7w 4d	MEQW	C57BL/6N;C57BL/6NTac	B6	4	A
MEQW22.1d	Naaa:Hom	Homozygous	Female	2013-02-13	Naaa	2013-04-08	165	7w 5d	MEQW	C57BL/6N;C57BL/6NTac	B6	4	A
MEQW22.1e	Naaa:Hom	Homozygous	Female	2013-02-13	Naaa	2013-04-08	100	7w 5d	MEQW	C57BL/6N;C57BL/6NTac	B6	4	A
MEQW22.1g	Naaa:Hom	Homozygous	Female	2013-02-13	Naaa	2013-04-08	140	7w 5d	MEQW	C57BL/6N;C57BL/6NTac	B6	4	A
MEQW22.1h	Naaa:Hom	Homozygous	Female	2013-02-13	Naaa	2013-04-08	114	7w 5d	MEQW	C57BL/6N;C57BL/6NTac	B6	4	A
MEBR28.4c	Smyd5:Hom	Homozygous	Female	2013-02-09	Smyd5	2013-04-08	125	8w 2d	MEBR	C57BL/6N;C57BL/6NTac	B6	4	A
MEBR28.4e	Smyd5:Hom	Homozygous	Female	2013-02-09	Smyd5	2013-04-08		8w 2d	MEBR	C57BL/6N;C57BL/6NTac	B6	4	A	Excluded (as difficulty dosing)
MEBR33.2d	Smyd5:Hom	Homozygous	Female	2013-02-11	Smyd5	2013-04-08	108	8w	MEBR	C57BL/6N;C57BL/6NTac	B6	4	A
MEBR34.2e	Smyd5:Hom	Homozygous	Female	2013-02-14	Smyd5	2013-04-08		7w 4d	MEBR	C57BL/6N;C57BL/6NTac	B6	4	A	Excluded (as difficulty dosing)
MCSB80.2j	Ush1c:Hom	Homozygous	Female	2013-02-07	Ush1c	2013-04-08	158	8w 4d	MCSB	C57BL/6N;C57BL/6NTac	B6	4	A
MCSB83.3i	Ush1c:Hom	Homozygous	Female	2013-02-14	Ush1c	2013-04-08	300	7w 4d	MCSB	C57BL/6N;C57BL/6NTac	B6	4	A
MCSB83.3j	Ush1c:Hom	Homozygous	Female	2013-02-14	Ush1c	2013-04-08	60	7w 4d	MCSB	C57BL/6N;C57BL/6NTac	B6	4	A
MCSB87.2e	Ush1c:Hom	Homozygous	Female	2013-02-17	Ush1c	2013-04-08	155	7w 1d	MCSB	C57BL/6N;C57BL/6NTac	B6	4	A
MCSB88.1g	Ush1c:Hom	Homozygous	Female	2013-02-14	Ush1c	2013-04-08	280	7w 4d	MCSB	C57BL/6N;C57BL/6NTac	B6	4	A
MCZV61.2d	B9d2:Het	Heterozygous	Female	2013-02-19	B9d2	2013-04-08	185	6w 6d	MCZV	C57BL/6N;C57BL/6NTac	B6	4	A
MCZV61.2e	B9d2:Het	Heterozygous	Female	2013-02-19	B9d2	2013-04-08	263	6w 6d	MCZV	C57BL/6N;C57BL/6NTac	B6	4	A
MCZV61.2f	B9d2:Het	Heterozygous	Female	2013-02-19	B9d2	2013-04-08	160	6w 6d	MCZV	C57BL/6N;C57BL/6NTac	B6	4	A
MCZV61.2g	B9d2:Het	Heterozygous	Female	2013-02-19	B9d2	2013-04-08	240	6w 6d	MCZV	C57BL/6N;C57BL/6NTac	B6	4	A
MCZV61.2h	B9d2:Het	Heterozygous	Female	2013-02-19	B9d2	2013-04-08	70	6w 6d	MCZV	C57BL/6N;C57BL/6NTac	B6	4	A
MFFT18.1e	WT	Wildtype	Male	2013-02-10		2013-04-08	210	8w 1d	MFFT	C57BL/6N;C57BL/6NTac	B6	4	B
MFFT18.1f	WT	Wildtype	Male	2013-02-10		2013-04-08		8w 1d	MFFT	C57BL/6N;C57BL/6NTac	B6	4	B	Excluded (count <30 so presumed failed dosing)
MFFT18.1g	WT	Wildtype	Male	2013-02-10		2013-04-08	86	8w 1d	MFFT	C57BL/6N;C57BL/6NTac	B6	4	B
MFFT18.1h	WT	Wildtype	Male	2013-02-10		2013-04-08	112	8w 1d	MFFT	C57BL/6N;C57BL/6NTac	B6	4	B
GTF10.1a	WT	Wildtype	Male	2013-02-13		2013-04-08	119	7w 5d	GTF	C57BL/6N;C57BL/6NTac	B6	4	B
GTF10.1b	WT	Wildtype	Male	2013-02-13		2013-04-08	206	7w 5d	GTF	C57BL/6N;C57BL/6NTac	B6	4	B
GTF10.1d	WT	Wildtype	Male	2013-02-13		2013-04-08	150	7w 5d	GTF	C57BL/6N;C57BL/6NTac	B6	4	B
GTF5.2a	WT	Wildtype	Male	2013-02-12		2013-04-08		7w 6d	GTF	C57BL/6N;C57BL/6NTac	B6	4	B	Excluded (count <30 so presumed failed dosing)
GTF5.2d	WT	Wildtype	Male	2013-02-12		2013-04-08	132	7w 6d	GTF	C57BL/6N;C57BL/6NTac	B6	4	B
IRFS14.1a	WT	Wildtype	Male	2013-02-09		2013-04-08	178	8w 2d	IRFS	C57BL/6N;C57BL/6NTac	B6	4	B
IRFS16.1e	WT	Wildtype	Male	2013-02-12		2013-04-08	145	7w 6d	IRFS	C57BL/6N;C57BL/6NTac	B6	4	B
MFKV12.2a	WT	Wildtype	Male	2013-02-06		2013-04-08	148	8w 5d	MFKV	C57BL/6N;C57BL/6NTac	B6	4	B
MFKV12.2b	WT	Wildtype	Male	2013-02-06		2013-04-08	127	8w 5d	MFKV	C57BL/6N;C57BL/6NTac	B6	4	B
MFKV12.2c	WT	Wildtype	Male	2013-02-06		2013-04-08	86	8w 5d	MFKV	C57BL/6N;C57BL/6NTac	B6	4	B
MFKV12.2d	WT	Wildtype	Male	2013-02-06		2013-04-08	145	8w 5d	MFKV	C57BL/6N;C57BL/6NTac	B6	4	B
IRFS14.1b	Irf7:Hom	Homozygous	Male	2013-02-09	Irf7	2013-04-08	218	8w 2d	IRFS	C57BL/6N;C57BL/6NTac	B6	4	B
IRFS14.1c	Irf7:Hom	Homozygous	Male	2013-02-09	Irf7	2013-04-08	310	8w 2d	IRFS	C57BL/6N;C57BL/6NTac	B6	4	B
IRFS14.1e	Irf7:Hom	Homozygous	Male	2013-02-09	Irf7	2013-04-08	92	8w 2d	IRFS	C57BL/6N;C57BL/6NTac	B6	4	B
IRFS15.1a	Irf7:Hom	Homozygous	Male	2013-02-10	Irf7	2013-04-08	315	8w 1d	IRFS	C57BL/6N;C57BL/6NTac	B6	4	B
IRFS15.1b	Irf7:Hom	Homozygous	Male	2013-02-10	Irf7	2013-04-08	400	8w 1d	IRFS	C57BL/6N;C57BL/6NTac	B6	4	B
MEQX41.1a	Slc20a2:Hom	Homozygous	Male	2013-02-15	Slc20a2	2013-04-08	180	7w 3d	MEQX	C57BL/6N;C57BL/6NTac	B6	4	B
MEQX41.1b	Slc20a2:Hom	Homozygous	Male	2013-02-15	Slc20a2	2013-04-08	85	7w 3d	MEQX	C57BL/6N;C57BL/6NTac	B6	4	B
MEQX41.1c	Slc20a2:Hom	Homozygous	Male	2013-02-15	Slc20a2	2013-04-08	205	7w 3d	MEQX	C57BL/6N;C57BL/6NTac	B6	4	B
MEQX41.1d	Slc20a2:Hom	Homozygous	Male	2013-02-15	Slc20a2	2013-04-08	100	7w 3d	MEQX	C57BL/6N;C57BL/6NTac	B6	4	B
METX20.3b	Ddx55:Het	Heterozygous	Male	2013-02-17	Ddx55	2013-04-08	138	7w 1d	METX	C57BL/6N;C57BL/6NTac	B6	4	B
METX26.2c	Ddx55:Het	Heterozygous	Male	2013-02-11	Ddx55	2013-04-08	120	8w	METX	C57BL/6N;C57BL/6NTac	B6	4	B
METX27.2c	Ddx55:Het	Heterozygous	Male	2013-02-17	Ddx55	2013-04-08	180	7w 1d	METX	C57BL/6N;C57BL/6NTac	B6	4	B
METX27.2g	Ddx55:Het	Heterozygous	Male	2013-02-17	Ddx55	2013-04-08	78	7w 1d	METX	C57BL/6N;C57BL/6NTac	B6	4	B
METX28.3a	Ddx55:Het	Heterozygous	Male	2013-02-11	Ddx55	2013-04-08	84	8w	METX	C57BL/6N;C57BL/6NTac	B6	4	B
GTF10.1c	Gtf2a1:Het	Heterozygous	Male	2013-02-13	Gtf2a1	2013-04-08	96	7w 5d	GTF	C57BL/6N;C57BL/6NTac	B6	4	B
GTF5.2b	Gtf2a1:Het	Heterozygous	Male	2013-02-12	Gtf2a1	2013-04-08	82	7w 6d	GTF	C57BL/6N;C57BL/6NTac	B6	4	B
GTF5.2c	Gtf2a1:Het	Heterozygous	Male	2013-02-12	Gtf2a1	2013-04-08	130	7w 6d	GTF	C57BL/6N;C57BL/6NTac	B6	4	B
MDWY42.2d	WT	Wildtype	Female	2013-02-12		2013-04-09	195	8w	MDWY	C57BL/6N;C57BL/6NTac	B6	4	A
MDWY42.2f	WT	Wildtype	Female	2013-02-12		2013-04-09	123	8w	MDWY	C57BL/6N;C57BL/6NTac	B6	4	A
MDWY42.2g	WT	Wildtype	Female	2013-02-12		2013-04-09	178	8w	MDWY	C57BL/6N;C57BL/6NTac	B6	4	A
MDWY42.2i	WT	Wildtype	Female	2013-02-12		2013-04-09	157	8w	MDWY	C57BL/6N;C57BL/6NTac	B6	4	A
MDWY42.2j	WT	Wildtype	Female	2013-02-12		2013-04-09	160	8w	MDWY	C57BL/6N;C57BL/6NTac	B6	4	A
MDWY45.2e	WT	Wildtype	Female	2013-02-10		2013-04-09	164	8w 2d	MDWY	C57BL/6N;C57BL/6NTac	B6	4	A
DGLF1.3f	WT	Wildtype	Female	2013-01-23		2013-04-09		10w 6d	DGLF	C57BL/6JIco;129P2/OlaHsd	129/B6	4	A	Excluded (count <30 so presumed failed dosing)
DGLF12.1e	WT	Wildtype	Female	2013-02-11		2013-04-09	180	8w 1d	DGLF	C57BL/6JIco;129P2/OlaHsd	129/B6	4	A
MFPT6.3e	WT	Wildtype	Female	2013-02-08		2013-04-09	88	8w 4d	MFPT	C57BL/6N;C57BL/6NTac	B6	4	A
MFPT6.3g	WT	Wildtype	Female	2013-02-08		2013-04-09	180	8w 4d	MFPT	C57BL/6N;C57BL/6NTac	B6	4	A
MFPT6.3h	WT	Wildtype	Female	2013-02-08		2013-04-09	122	8w 4d	MFPT	C57BL/6N;C57BL/6NTac	B6	4	A
MFPT6.3j	WT	Wildtype	Female	2013-02-08		2013-04-09	80	8w 4d	MFPT	C57BL/6N;C57BL/6NTac	B6	4	A
MFPT6.3k	WT	Wildtype	Female	2013-02-08		2013-04-09	112	8w 4d	MFPT	C57BL/6N;C57BL/6NTac	B6	4	A
MERP30.2d	Dsg1b:Hom	Homozygous	Female	2013-02-01	Dsg1b	2013-04-09	124	9w 4d	MERP	C57BL/6N;C57BL/6NTac	B6	4	A
MERP31.3e	Dsg1b:Hom	Homozygous	Female	2013-02-13	Dsg1b	2013-04-09	165	7w 6d	MERP	C57BL/6N;C57BL/6NTac	B6	4	A
MERP31.3f	Dsg1b:Hom	Homozygous	Female	2013-02-13	Dsg1b	2013-04-09	86	7w 6d	MERP	C57BL/6N;C57BL/6NTac	B6	4	A
MERP31.3g	Dsg1b:Hom	Homozygous	Female	2013-02-13	Dsg1b	2013-04-09	144	7w 6d	MERP	C57BL/6N;C57BL/6NTac	B6	4	A
MERP31.3i	Dsg1b:Hom	Homozygous	Female	2013-02-13	Dsg1b	2013-04-09	123	7w 6d	MERP	C57BL/6N;C57BL/6NTac	B6	4	A
MERP39.1c	Dsg1b:Hom	Homozygous	Female	2013-02-01	Dsg1b	2013-04-09	90	9w 4d	MERP	C57BL/6N;C57BL/6NTac	B6	4	A
MERP40.1d	Dsg1b:Hom	Homozygous	Female	2013-02-02	Dsg1b	2013-04-09	139	9w 3d	MERP	C57BL/6N;C57BL/6NTac	B6	4	A
MERP41.1e	Dsg1b:Hom	Homozygous	Female	2013-02-01	Dsg1b	2013-04-09	85	9w 4d	MERP	C57BL/6N;C57BL/6NTac	B6	4	A
MFEH25.1f	H2-Eb1:Hom	Homozygous	Female	2013-02-14	H2-Eb1	2013-04-09	125	7w 5d	MFEH	C57BL/6N;C57BL/6NTac	B6	4	A
MFEH27.1d	H2-Eb1:Hom	Homozygous	Female	2013-02-13	H2-Eb1	2013-04-09	160	7w 6d	MFEH	C57BL/6N;C57BL/6NTac	B6	4	A
MFEH27.1e	H2-Eb1:Hom	Homozygous	Female	2013-02-13	H2-Eb1	2013-04-09	122	7w 6d	MFEH	C57BL/6N;C57BL/6NTac	B6	4	A
MFEH27.1f	H2-Eb1:Hom	Homozygous	Female	2013-02-13	H2-Eb1	2013-04-09	136	7w 6d	MFEH	C57BL/6N;C57BL/6NTac	B6	4	A
MFEH27.1g	H2-Eb1:Hom	Homozygous	Female	2013-02-13	H2-Eb1	2013-04-09	170	7w 6d	MFEH	C57BL/6N;C57BL/6NTac	B6	4	A
MFEH27.1h	H2-Eb1:Hom	Homozygous	Female	2013-02-13	H2-Eb1	2013-04-09	138	7w 6d	MFEH	C57BL/6N;C57BL/6NTac	B6	4	A
DGLF1.3e	PSD95:Hom	Homozygous	Female	2013-01-23	Dlg4	2013-04-09	181	10w 6d	DGLF	C57BL/6JIco;129P2/OlaHsd	129/B6	4	A
DGLF1.3g	PSD95:Hom	Homozygous	Female	2013-01-23	Dlg4	2013-04-09	260	10w 6d	DGLF	C57BL/6JIco;129P2/OlaHsd	129/B6	4	A
DGLF13.2b	PSD95:Hom	Homozygous	Female	2013-02-13	Dlg4	2013-04-09	180	7w 6d	DGLF	C57BL/6JIco;129P2/OlaHsd	129/B6	4	A
DGLF13.2c	PSD95:Hom	Homozygous	Female	2013-02-13	Dlg4	2013-04-09	270	7w 6d	DGLF	C57BL/6JIco;129P2/OlaHsd	129/B6	4	A
DGLF13.2e	PSD95:Hom	Homozygous	Female	2013-02-13	Dlg4	2013-04-09	205	7w 6d	DGLF	C57BL/6JIco;129P2/OlaHsd	129/B6	4	A
MEYQ20.1f	Zscan2:Hom	Homozygous	Female	2013-02-15	Zscan2	2013-04-09	240	7w 4d	MEYQ	C57BL/6N;C57BL/6NTac	B6	4	A
MEYQ22.1d	Zscan2:Hom	Homozygous	Female	2013-02-13	Zscan2	2013-04-09	160	7w 6d	MEYQ	C57BL/6N;C57BL/6NTac	B6	4	A
MEYQ24.1d	Zscan2:Hom	Homozygous	Female	2013-02-11	Zscan2	2013-04-09	116	8w 1d	MEYQ	C57BL/6N;C57BL/6NTac	B6	4	A
MEYQ24.1e	Zscan2:Hom	Homozygous	Female	2013-02-11	Zscan2	2013-04-09		8w 1d	MEYQ	C57BL/6N;C57BL/6NTac	B6	4	A	Excluded (as difficulty dosing)
MEYQ25.1d	Zscan2:Hom	Homozygous	Female	2013-02-13	Zscan2	2013-04-09	190	7w 6d	MEYQ	C57BL/6N;C57BL/6NTac	B6	4	A
MEYQ25.1e	Zscan2:Hom	Homozygous	Female	2013-02-13	Zscan2	2013-04-09	243	7w 6d	MEYQ	C57BL/6N;C57BL/6NTac	B6	4	A
MEYQ25.1f	Zscan2:Hom	Homozygous	Female	2013-02-13	Zscan2	2013-04-09	260	7w 6d	MEYQ	C57BL/6N;C57BL/6NTac	B6	4	A
MEYQ26.1e	Zscan2:Hom	Homozygous	Female	2013-02-14	Zscan2	2013-04-09	175	7w 5d	MEYQ	C57BL/6N;C57BL/6NTac	B6	4	A
MEYQ26.1f	Zscan2:Hom	Homozygous	Female	2013-02-14	Zscan2	2013-04-09	176	7w 5d	MEYQ	C57BL/6N;C57BL/6NTac	B6	4	A
DGLF1.4b	PSD95:Het	Heterozygous	Female	2013-02-13	Dlg4	2013-04-09	165	7w 6d	DGLF	C57BL/6JIco;129P2/OlaHsd	129/B6	4	A
DGLF12.1c	PSD95:Het	Heterozygous	Female	2013-02-11	Dlg4	2013-04-09	215	8w 1d	DGLF	C57BL/6JIco;129P2/OlaHsd	129/B6	4	A
DGLF12.1d	PSD95:Het	Heterozygous	Female	2013-02-11	Dlg4	2013-04-09	65	8w 1d	DGLF	C57BL/6JIco;129P2/OlaHsd	129/B6	4	A
DGLF13.2d	PSD95:Het	Heterozygous	Female	2013-02-13	Dlg4	2013-04-09	64	7w 6d	DGLF	C57BL/6JIco;129P2/OlaHsd	129/B6	4	A
DGLF13.2f	PSD95:Het	Heterozygous	Female	2013-02-13	Dlg4	2013-04-09	250	7w 6d	DGLF	C57BL/6JIco;129P2/OlaHsd	129/B6	4	A
MDUP36.3d	Rnaseh2c:Het	Heterozygous	Female	2013-02-12	Rnaseh2c	2013-04-09	175	8w	MDUP	C57BL/6N;C57BL/6NTac	B6	4	A
MDUP42.1c	Rnaseh2c:Het	Heterozygous	Female	2013-02-01	Rnaseh2c	2013-04-09	90	9w 4d	MDUP	C57BL/6N;C57BL/6NTac	B6	4	A
MDUP44.1a	Rnaseh2c:Het	Heterozygous	Female	2013-02-03	Rnaseh2c	2013-04-09	170	9w 2d	MDUP	C57BL/6N;C57BL/6NTac	B6	4	A
MDUP44.1b	Rnaseh2c:Het	Heterozygous	Female	2013-02-03	Rnaseh2c	2013-04-09	105	9w 2d	MDUP	C57BL/6N;C57BL/6NTac	B6	4	A
GTF5.2f	WT	Wildtype	Female	2013-02-12		2013-04-15	250	8w 6d	GTF	C57BL/6N;C57BL/6NTac	B6	4	A
GTF9.1d	WT	Wildtype	Female	2013-01-30		2013-04-15	150	10w 5d	GTF	C57BL/6N;C57BL/6NTac	B6	4	A
MEFL27.1f	WT	Wildtype	Female	2013-02-18		2013-04-15	310	8w	MEFL	C57BL/6N;C57BL/6NTac	B6	4	A
MEFL27.1h	WT	Wildtype	Female	2013-02-18		2013-04-15	346	8w	MEFL	C57BL/6N;C57BL/6NTac	B6	4	A
MEFL32.1j	WT	Wildtype	Female	2013-02-17		2013-04-15	280	8w 1d	MEFL	C57BL/6N;C57BL/6NTac	B6	4	A
MEFL33.1e	WT	Wildtype	Female	2013-02-21		2013-04-15	275	7w 4d	MEFL	C57BL/6N;C57BL/6NTac	B6	4	A
MEFL34.1d	WT	Wildtype	Female	2013-02-21		2013-04-15	279	7w 4d	MEFL	C57BL/6N;C57BL/6NTac	B6	4	A
MDGL63.3g	WT	Wildtype	Female	2013-02-23		2013-04-15	190	7w 2d	MDGL	C57BL/6N;C57BL/6NTac	B6	4	A
MDGL63.3i	WT	Wildtype	Female	2013-02-23		2013-04-15	300	7w 2d	MDGL	C57BL/6N;C57BL/6NTac	B6	4	A
MDGL63.3j	WT	Wildtype	Female	2013-02-23		2013-04-15		7w 2d	MDGL	C57BL/6N;C57BL/6NTac	B6	4	A	Excluded (as difficulty dosing)
MDGL65.1e	WT	Wildtype	Female	2013-02-21		2013-04-15	230	7w 4d	MDGL	C57BL/6N;C57BL/6NTac	B6	4	A
MDGL65.1f	WT	Wildtype	Female	2013-02-21		2013-04-15	250	7w 4d	MDGL	C57BL/6N;C57BL/6NTac	B6	4	A
MDGL65.1g	WT	Wildtype	Female	2013-02-21		2013-04-15	306	7w 4d	MDGL	C57BL/6N;C57BL/6NTac	B6	4	A
MAP10.1g	WT	Wildtype	Female	2013-02-20		2013-04-15	316	7w 5d	MAP	C57BL/6N;C57BL/6NTac	B6	4	A
MAP7.1c	WT	Wildtype	Female	2013-02-19		2013-04-15	285	7w 6d	MAP	C57BL/6N;C57BL/6NTac	B6	4	A
MAP7.1d	WT	Wildtype	Female	2013-02-19		2013-04-15	170	7w 6d	MAP	C57BL/6N;C57BL/6NTac	B6	4	A
MAP7.1e	WT	Wildtype	Female	2013-02-19		2013-04-15	280	7w 6d	MAP	C57BL/6N;C57BL/6NTac	B6	4	A
MFDF21.3j	1700008O03Rik:Hom	Homozygous	Female	2013-02-09	1700008O03Rik	2013-04-15	280	9w 2d	MFDF	C57BL/6N;C57BL/6NTac	B6	4	A
MFDF24.1e	1700008O03Rik:Hom	Homozygous	Female	2013-02-20	1700008O03Rik	2013-04-15	78	7w 5d	MFDF	C57BL/6N;C57BL/6NTac	B6	4	A	Excluded (as difficulty dosing)
MFDF24.1f	1700008O03Rik:Hom	Homozygous	Female	2013-02-20	1700008O03Rik	2013-04-15	132	7w 5d	MFDF	C57BL/6N;C57BL/6NTac	B6	4	A
MFDF26.1f	1700008O03Rik:Hom	Homozygous	Female	2013-02-21	1700008O03Rik	2013-04-15	290	7w 4d	MFDF	C57BL/6N;C57BL/6NTac	B6	4	A
MCND62.1e	Aff3:Hom	Homozygous	Female	2013-02-20	Aff3	2013-04-15	90	7w 5d	MCND	C57BL/6N;C57BL/6NTac	B6	4	A
MCND63.1d	Aff3:Hom	Homozygous	Female	2013-02-05	Aff3	2013-04-15	170	9w 6d	MCND	C57BL/6N;C57BL/6NTac	B6	4	A
MCND63.1f	Aff3:Hom	Homozygous	Female	2013-02-05	Aff3	2013-04-15	280	9w 6d	MCND	C57BL/6N;C57BL/6NTac	B6	4	A
METD32.2d	Pdzd3:Hom	Homozygous	Female	2013-02-20	Pdzd3	2013-04-15	240	7w 5d	METD	C57BL/6N;C57BL/6NTac	B6	4	A
METD32.2e	Pdzd3:Hom	Homozygous	Female	2013-02-20	Pdzd3	2013-04-15	324	7w 5d	METD	C57BL/6N;C57BL/6NTac	B6	4	A
METD32.2f	Pdzd3:Hom	Homozygous	Female	2013-02-20	Pdzd3	2013-04-15	180	7w 5d	METD	C57BL/6N;C57BL/6NTac	B6	4	A
METD33.3i	Pdzd3:Hom	Homozygous	Female	2013-02-14	Pdzd3	2013-04-15	380	8w 4d	METD	C57BL/6N;C57BL/6NTac	B6	4	A
METD35.2h	Pdzd3:Hom	Homozygous	Female	2013-02-14	Pdzd3	2013-04-15	330	8w 4d	METD	C57BL/6N;C57BL/6NTac	B6	4	A
METD37.3f	Pdzd3:Hom	Homozygous	Female	2013-02-23	Pdzd3	2013-04-15	280	7w 2d	METD	C57BL/6N;C57BL/6NTac	B6	4	A
METD37.3h	Pdzd3:Hom	Homozygous	Female	2013-02-23	Pdzd3	2013-04-15	240	7w 2d	METD	C57BL/6N;C57BL/6NTac	B6	4	A
METD37.3i	Pdzd3:Hom	Homozygous	Female	2013-02-23	Pdzd3	2013-04-15	360	7w 2d	METD	C57BL/6N;C57BL/6NTac	B6	4	A
MEBJ43.2c	Rasal2:Hom	Homozygous	Female	2013-02-20	Rasal2	2013-04-15	64	7w 5d	MEBJ	C57BL/6N;C57BL/6NTac	B6	4	A
MEBJ43.2d	Rasal2:Hom	Homozygous	Female	2013-02-20	Rasal2	2013-04-15	15	7w 5d	MEBJ	C57BL/6N;C57BL/6NTac	B6	4	A
MEBJ43.2f	Rasal2:Hom	Homozygous	Female	2013-02-20	Rasal2	2013-04-15	78	7w 5d	MEBJ	C57BL/6N;C57BL/6NTac	B6	4	A
MAP7.1i	Map3k1:Het	Heterozygous	Female	2013-02-19	Map3k1	2013-04-15	104	7w 6d	MAP	C57BL/6N;C57BL/6NTac	B6	4	A
MAP8.1e	Map3k1:Het	Heterozygous	Female	2013-02-26	Map3k1	2013-04-15	200	6w 6d	MAP	C57BL/6N;C57BL/6NTac	B6	4	A
MAP8.1f	Map3k1:Het	Heterozygous	Female	2013-02-26	Map3k1	2013-04-15	289	6w 6d	MAP	C57BL/6N;C57BL/6NTac	B6	4	A
MEAD26.1a	WT	Wildtype	Male	2013-02-13		2013-04-15	145	8w 5d	MEAD	C57BL/6N;C57BL/6NTac	B6	4	B
MEAD26.1b	WT	Wildtype	Male	2013-02-13		2013-04-15	180	8w 5d	MEAD	C57BL/6N;C57BL/6NTac	B6	4	B
MEAD26.1c	WT	Wildtype	Male	2013-02-13		2013-04-15	215	8w 5d	MEAD	C57BL/6N;C57BL/6NTac	B6	4	B
MEAD26.1d	WT	Wildtype	Male	2013-02-13		2013-04-15	220	8w 5d	MEAD	C57BL/6N;C57BL/6NTac	B6	4	B
IRFS10.3a	WT	Wildtype	Male	2013-02-24		2013-04-15	224	7w 1d	IRFS	C57BL/6N;C57BL/6NTac	B6	4	B
IRFS5.3a	WT	Wildtype	Male	2013-02-22		2013-04-15	280	7w 3d	IRFS	C57BL/6N;C57BL/6NTac	B6	4	B
IRFS5.3c	WT	Wildtype	Male	2013-02-22		2013-04-15	200	7w 3d	IRFS	C57BL/6N;C57BL/6NTac	B6	4	B
IRFS5.3d	WT	Wildtype	Male	2013-02-22		2013-04-15	230	7w 3d	IRFS	C57BL/6N;C57BL/6NTac	B6	4	B
IRFS5.3e	WT	Wildtype	Male	2013-02-22		2013-04-15	340	7w 3d	IRFS	C57BL/6N;C57BL/6NTac	B6	4	B
MAP10.1c	WT	Wildtype	Male	2013-02-20		2013-04-15	124	7w 5d	MAP	C57BL/6N;C57BL/6NTac	B6	4	B
MAP7.1a	WT	Wildtype	Male	2013-02-19		2013-04-15	111	7w 6d	MAP	C57BL/6N;C57BL/6NTac	B6	4	B
MFFA21.1a	WT	Wildtype	Male	2013-02-11		2013-04-15	105	9w	MFFA	C57BL/6N;C57BL/6NTac	B6	4	B
MFFA21.1c	WT	Wildtype	Male	2013-02-11		2013-04-15	125	9w	MFFA	C57BL/6N;C57BL/6NTac	B6	4	B
MFFA21.1d	WT	Wildtype	Male	2013-02-11		2013-04-15	195	9w	MFFA	C57BL/6N;C57BL/6NTac	B6	4	B
MFFA21.1e	WT	Wildtype	Male	2013-02-11		2013-04-15	102	9w	MFFA	C57BL/6N;C57BL/6NTac	B6	4	B
NFK10.1e	WT	Wildtype	Male	2013-02-22		2013-04-15	220	7w 3d	NFK	C57BL/6Brd-Tyr<c-Brd>;C57BL/6Dnk;C57BL/6NTac	B6	4	B
NFK13.1a	WT	Wildtype	Male	2013-02-20		2013-04-15	350	7w 5d	NFK	C57BL/6Brd-Tyr<c-Brd>;C57BL/6Dnk;C57BL/6NTac	B6	4	B
NFK13.1b	WT	Wildtype	Male	2013-02-20		2013-04-15	300	7w 5d	NFK	C57BL/6Brd-Tyr<c-Brd>;C57BL/6Dnk;C57BL/6NTac	B6	4	B
NFK13.1c	WT	Wildtype	Male	2013-02-20		2013-04-15	174	7w 5d	NFK	C57BL/6Brd-Tyr<c-Brd>;C57BL/6Dnk;C57BL/6NTac	B6	4	B
NFK8.2a	WT	Wildtype	Male	2013-02-26		2013-04-15	220	6w 6d	NFK	C57BL/6Brd-Tyr<c-Brd>;C57BL/6Dnk;C57BL/6NTac	B6	4	B
NFK8.2c	WT	Wildtype	Male	2013-02-26		2013-04-15	140	6w 6d	NFK	C57BL/6Brd-Tyr<c-Brd>;C57BL/6Dnk;C57BL/6NTac	B6	4	B
NFK8.2e	WT	Wildtype	Male	2013-02-26		2013-04-15	238	6w 6d	NFK	C57BL/6Brd-Tyr<c-Brd>;C57BL/6Dnk;C57BL/6NTac	B6	4	B
NFK8.2h	WT	Wildtype	Male	2013-02-26		2013-04-15	200	6w 6d	NFK	C57BL/6Brd-Tyr<c-Brd>;C57BL/6Dnk;C57BL/6NTac	B6	4	B
DGLT8.3a	Dlg2:Hom	Homozygous	Male	2013-02-27	Dlg2	2013-04-15	290	6w 5d	DGLT	C57BL/6N;C57BL/6NTac	B6	4	B
DGLT8.3b	Dlg2:Hom	Homozygous	Male	2013-02-27	Dlg2	2013-04-15	80	6w 5d	DGLT	C57BL/6N;C57BL/6NTac	B6	4	B
DGLT9.3a	Dlg2:Hom	Homozygous	Male	2013-02-08	Dlg2	2013-04-15	256	9w 3d	DGLT	C57BL/6N;C57BL/6NTac	B6	4	B
DGLT9.3b	Dlg2:Hom	Homozygous	Male	2013-02-08	Dlg2	2013-04-15	200	9w 3d	DGLT	C57BL/6N;C57BL/6NTac	B6	4	B
DGLT9.3c	Dlg2:Hom	Homozygous	Male	2013-02-08	Dlg2	2013-04-15	105	9w 3d	DGLT	C57BL/6N;C57BL/6NTac	B6	4	B
IRFS10.3b	Irf7:Hom	Homozygous	Male	2013-02-24	Irf7	2013-04-15	224	7w 1d	IRFS	C57BL/6N;C57BL/6NTac	B6	4	B
IRFS10.3d	Irf7:Hom	Homozygous	Male	2013-02-24	Irf7	2013-04-15	350	7w 1d	IRFS	C57BL/6N;C57BL/6NTac	B6	4	B
IRFS12.1a	Irf7:Hom	Homozygous	Male	2013-02-24	Irf7	2013-04-15		7w 1d	IRFS	C57BL/6N;C57BL/6NTac	B6	4	B	Excluded (as difficulty dosing)
IRFS12.1b	Irf7:Hom	Homozygous	Male	2013-02-24	Irf7	2013-04-15	270	7w 1d	IRFS	C57BL/6N;C57BL/6NTac	B6	4	B
IRFS12.1c	Irf7:Hom	Homozygous	Male	2013-02-24	Irf7	2013-04-15	310	7w 1d	IRFS	C57BL/6N;C57BL/6NTac	B6	4	B
RIKA5.2a	Lacc1:Hom	Homozygous	Male	2013-02-20	Lacc1	2013-04-15	39	7w 5d	RIKA	C57BL/6N;C57BL/6NTac	B6	4	B
RIKA5.2b	Lacc1:Hom	Homozygous	Male	2013-02-20	Lacc1	2013-04-15	96	7w 5d	RIKA	C57BL/6N;C57BL/6NTac	B6	4	B
RIKA5.2c	Lacc1:Hom	Homozygous	Male	2013-02-20	Lacc1	2013-04-15	158	7w 5d	RIKA	C57BL/6N;C57BL/6NTac	B6	4	B
RIKA5.2d	Lacc1:Hom	Homozygous	Male	2013-02-20	Lacc1	2013-04-15	33	7w 5d	RIKA	C57BL/6N;C57BL/6NTac	B6	4	B
RIKA5.2e	Lacc1:Hom	Homozygous	Male	2013-02-20	Lacc1	2013-04-15	140	7w 5d	RIKA	C57BL/6N;C57BL/6NTac	B6	4	B
RIKA5.2f	Lacc1:Hom	Homozygous	Male	2013-02-20	Lacc1	2013-04-15	190	7w 5d	RIKA	C57BL/6N;C57BL/6NTac	B6	4	B
RIKA6.2b	Lacc1:Hom	Homozygous	Male	2013-02-19	Lacc1	2013-04-15	70	7w 6d	RIKA	C57BL/6N;C57BL/6NTac	B6	4	B
RIKA6.2c	Lacc1:Hom	Homozygous	Male	2013-02-19	Lacc1	2013-04-15	95	7w 6d	RIKA	C57BL/6N;C57BL/6NTac	B6	4	B
RIKA7.1a	Lacc1:Hom	Homozygous	Male	2013-02-06	Lacc1	2013-04-15	36	9w 5d	RIKA	C57BL/6N;C57BL/6NTac	B6	4	B
NFK10.1f	Nfkb1:Hom	Homozygous	Male	2013-02-22	Nfkb1	2013-04-15	213	7w 3d	NFK	C57BL/6Brd-Tyr<c-Brd>;C57BL/6Dnk;C57BL/6NTac	B6	4	B
NFK8.2d	Nfkb1:Hom	Homozygous	Male	2013-02-26	Nfkb1	2013-04-15	240	6w 6d	NFK	C57BL/6Brd-Tyr<c-Brd>;C57BL/6Dnk;C57BL/6NTac	B6	4	B
NFK8.2g	Nfkb1:Hom	Homozygous	Male	2013-02-26	Nfkb1	2013-04-15	300	6w 6d	NFK	C57BL/6Brd-Tyr<c-Brd>;C57BL/6Dnk;C57BL/6NTac	B6	4	B
NFK8.2i	Nfkb1:Hom	Homozygous	Male	2013-02-26	Nfkb1	2013-04-15	212	6w 6d	NFK	C57BL/6Brd-Tyr<c-Brd>;C57BL/6Dnk;C57BL/6NTac	B6	4	B
NFK8.2j	Nfkb1:Hom	Homozygous	Male	2013-02-26	Nfkb1	2013-04-15	210	6w 6d	NFK	C57BL/6Brd-Tyr<c-Brd>;C57BL/6Dnk;C57BL/6NTac	B6	4	B
SPN20.1b	Spns2:Hom	Homozygous	Male	2013-02-12	Spns2	2013-04-15	40	8w 6d	SPN	C57BL/6Brd-Tyr<c-Brd>;C57BL/6Dnk;C57BL/6N;C57BL/6NTac	B6	4	B
SPN20.1c	Spns2:Hom	Homozygous	Male	2013-02-12	Spns2	2013-04-15	18	8w 6d	SPN	C57BL/6Brd-Tyr<c-Brd>;C57BL/6Dnk;C57BL/6N;C57BL/6NTac	B6	4	B
SPN20.1d	Spns2:Hom	Homozygous	Male	2013-02-12	Spns2	2013-04-15	24	8w 6d	SPN	C57BL/6Brd-Tyr<c-Brd>;C57BL/6Dnk;C57BL/6N;C57BL/6NTac	B6	4	B
SPN20.1f	Spns2:Hom	Homozygous	Male	2013-02-12	Spns2	2013-04-15	7	8w 6d	SPN	C57BL/6Brd-Tyr<c-Brd>;C57BL/6Dnk;C57BL/6N;C57BL/6NTac	B6	4	B
SPN22.1a	Spns2:Hom	Homozygous	Male	2013-02-13	Spns2	2013-04-15	40	8w 5d	SPN	C57BL/6Brd-Tyr<c-Brd>;C57BL/6Dnk;C57BL/6N;C57BL/6NTac	B6	4	B
SPN22.1b	Spns2:Hom	Homozygous	Male	2013-02-13	Spns2	2013-04-15	3	8w 5d	SPN	C57BL/6Brd-Tyr<c-Brd>;C57BL/6Dnk;C57BL/6N;C57BL/6NTac	B6	4	B
SPN22.1d	Spns2:Hom	Homozygous	Male	2013-02-13	Spns2	2013-04-15	40	8w 5d	SPN	C57BL/6Brd-Tyr<c-Brd>;C57BL/6Dnk;C57BL/6N;C57BL/6NTac	B6	4	B
MAP10.1a	Map3k1:Het	Heterozygous	Male	2013-02-20	Map3k1	2013-04-15	108	7w 5d	MAP	C57BL/6N;C57BL/6NTac	B6	4	B
MAP10.1b	Map3k1:Het	Heterozygous	Male	2013-02-20	Map3k1	2013-04-15	218	7w 5d	MAP	C57BL/6N;C57BL/6NTac	B6	4	B
MAP10.1d	Map3k1:Het	Heterozygous	Male	2013-02-20	Map3k1	2013-04-15	101	7w 5d	MAP	C57BL/6N;C57BL/6NTac	B6	4	B
MAP10.1e	Map3k1:Het	Heterozygous	Male	2013-02-20	Map3k1	2013-04-15	138	7w 5d	MAP	C57BL/6N;C57BL/6NTac	B6	4	B
MAP10.1f	Map3k1:Het	Heterozygous	Male	2013-02-20	Map3k1	2013-04-15		7w 5d	MAP	C57BL/6N;C57BL/6NTac	B6	4	B	Excluded (as difficulty dosing)
MAP7.1b	Map3k1:Het	Heterozygous	Male	2013-02-19	Map3k1	2013-04-15	75	7w 6d	MAP	C57BL/6N;C57BL/6NTac	B6	4	B
SPN20.1e	Spns2:Het	Heterozygous	Male	2013-02-12	Spns2	2013-04-15	133	8w 6d	SPN	C57BL/6Brd-Tyr<c-Brd>;C57BL/6Dnk;C57BL/6N;C57BL/6NTac	B6	4	B
SPN22.1c	Spns2:Het	Heterozygous	Male	2013-02-13	Spns2	2013-04-15	120	8w 5d	SPN	C57BL/6Brd-Tyr<c-Brd>;C57BL/6Dnk;C57BL/6N;C57BL/6NTac	B6	4	B
SPN29.1a	Spns2:Het	Heterozygous	Male	2013-02-21	Spns2	2013-04-15	122	7w 4d	SPN	C57BL/6Brd-Tyr<c-Brd>;C57BL/6Dnk;C57BL/6N;C57BL/6NTac	B6	4	B
SPN29.1b	Spns2:Het	Heterozygous	Male	2013-02-21	Spns2	2013-04-15		7w 4d	SPN	C57BL/6Brd-Tyr<c-Brd>;C57BL/6Dnk;C57BL/6N;C57BL/6NTac	B6	4	B	Excluded (as difficulty dosing)
SPN29.1c	Spns2:Het	Heterozygous	Male	2013-02-21	Spns2	2013-04-15	68	7w 4d	SPN	C57BL/6Brd-Tyr<c-Brd>;C57BL/6Dnk;C57BL/6N;C57BL/6NTac	B6	4	B
SPN29.1d	Spns2:Het	Heterozygous	Male	2013-02-21	Spns2	2013-04-15	140	7w 4d	SPN	C57BL/6Brd-Tyr<c-Brd>;C57BL/6Dnk;C57BL/6N;C57BL/6NTac	B6	4	B
SPN29.1e	Spns2:Het	Heterozygous	Male	2013-02-21	Spns2	2013-04-15	118	7w 4d	SPN	C57BL/6Brd-Tyr<c-Brd>;C57BL/6Dnk;C57BL/6N;C57BL/6NTac	B6	4	B
SPN29.1f	Spns2:Het	Heterozygous	Male	2013-02-21	Spns2	2013-04-15	128	7w 4d	SPN	C57BL/6Brd-Tyr<c-Brd>;C57BL/6Dnk;C57BL/6N;C57BL/6NTac	B6	4	B
MEFL29.1c	WT	Wildtype	Female	2013-02-21		2013-04-17	350	7w 6d	MEFL	C57BL/6N;C57BL/6NTac	B6	4	A	Excluded (as difficulty dosing)
MEFL29.1d	WT	Wildtype	Female	2013-02-21		2013-04-17	160	7w 6d	MEFL	C57BL/6N;C57BL/6NTac	B6	4	A
MEFL29.1e	WT	Wildtype	Female	2013-02-21		2013-04-17	200	7w 6d	MEFL	C57BL/6N;C57BL/6NTac	B6	4	A
MEFL30.1b	WT	Wildtype	Female	2013-02-20		2013-04-17	200	8w	MEFL	C57BL/6N;C57BL/6NTac	B6	4	A
MEFL30.1c	WT	Wildtype	Female	2013-02-20		2013-04-17	250	8w	MEFL	C57BL/6N;C57BL/6NTac	B6	4	A
MEFL30.1e	WT	Wildtype	Female	2013-02-20		2013-04-17	155	8w	MEFL	C57BL/6N;C57BL/6NTac	B6	4	A
MDGL64.1f	WT	Wildtype	Female	2013-02-18		2013-04-17	276	8w 2d	MDGL	C57BL/6N;C57BL/6NTac	B6	4	A
MDGL64.1g	WT	Wildtype	Female	2013-02-18		2013-04-17	290	8w 2d	MDGL	C57BL/6N;C57BL/6NTac	B6	4	A
MDGL71.1c	WT	Wildtype	Female	2013-02-24		2013-04-17	164	7w 3d	MDGL	C57BL/6N;C57BL/6NTac	B6	4	A
MDGL71.1d	WT	Wildtype	Female	2013-02-24		2013-04-17	210	7w 3d	MDGL	C57BL/6N;C57BL/6NTac	B6	4	A
MDGL71.1e	WT	Wildtype	Female	2013-02-24		2013-04-17	190	7w 3d	MDGL	C57BL/6N;C57BL/6NTac	B6	4	A
MDGL71.1f	WT	Wildtype	Female	2013-02-24		2013-04-17	240	7w 3d	MDGL	C57BL/6N;C57BL/6NTac	B6	4	A
MEYX20.2e	WT	Wildtype	Female	2013-02-18		2013-04-17	165	8w 2d	MEYX	C57BL/6N;C57BL/6NTac	B6	4	A
MEYX22.3a	WT	Wildtype	Female	2013-02-16		2013-04-17	140	8w 4d	MEYX	C57BL/6N;C57BL/6NTac	B6	4	A
MEYX27.1d	WT	Wildtype	Female	2013-02-11		2013-04-17	145	9w 2d	MEYX	C57BL/6N;C57BL/6NTac	B6	4	A
MEYX27.1e	WT	Wildtype	Female	2013-02-11		2013-04-17		9w 2d	MEYX	C57BL/6N;C57BL/6NTac	B6	4	A	Excluded (count <30 so presumed failed dosing)
CBLT2604.3c	WT	Wildtype	Female	2013-02-07		2013-04-17	240	9w 6d	CBLT	C57BL/6NTac	B6	4	A
CBLT2604.3d	WT	Wildtype	Female	2013-02-07		2013-04-17	175	9w 6d	CBLT	C57BL/6NTac	B6	4	A
CBLT2713.2f	WT	Wildtype	Female	2013-02-07		2013-04-17	220	9w 6d	CBLT	C57BL/6NTac	B6	4	A
CBLT2713.2g	WT	Wildtype	Female	2013-02-07		2013-04-17	225	9w 6d	CBLT	C57BL/6NTac	B6	4	A
CBLT2713.2h	WT	Wildtype	Female	2013-02-07		2013-04-17	260	9w 6d	CBLT	C57BL/6NTac	B6	4	A
CBLT2713.2i	WT	Wildtype	Female	2013-02-07		2013-04-17	195	9w 6d	CBLT	C57BL/6NTac	B6	4	A
DGLT8.3c	Dlg2:Hom	Homozygous	Female	2013-02-27	Dlg2	2013-04-17	110	7w	DGLT	C57BL/6N;C57BL/6NTac	B6	4	A
DGLT9.3d	Dlg2:Hom	Homozygous	Female	2013-02-08	Dlg2	2013-04-17	258	9w 5d	DGLT	C57BL/6N;C57BL/6NTac	B6	4	A
DGLT9.3e	Dlg2:Hom	Homozygous	Female	2013-02-08	Dlg2	2013-04-17	220	9w 5d	DGLT	C57BL/6N;C57BL/6NTac	B6	4	A
DGLT9.3f	Dlg2:Hom	Homozygous	Female	2013-02-08	Dlg2	2013-04-17	250	9w 5d	DGLT	C57BL/6N;C57BL/6NTac	B6	4	A
DGLT9.3g	Dlg2:Hom	Homozygous	Female	2013-02-08	Dlg2	2013-04-17	130	9w 5d	DGLT	C57BL/6N;C57BL/6NTac	B6	4	A
IRFS10.3f	Irf7:Hom	Homozygous	Female	2013-02-24	Irf7	2013-04-17	260	7w 3d	IRFS	C57BL/6N;C57BL/6NTac	B6	4	A
IRFS12.1d	Irf7:Hom	Homozygous	Female	2013-02-24	Irf7	2013-04-17	350	7w 3d	IRFS	C57BL/6N;C57BL/6NTac	B6	4	A
IRFS12.1e	Irf7:Hom	Homozygous	Female	2013-02-24	Irf7	2013-04-17	320	7w 3d	IRFS	C57BL/6N;C57BL/6NTac	B6	4	A
IRFS12.1f	Irf7:Hom	Homozygous	Female	2013-02-24	Irf7	2013-04-17	310	7w 3d	IRFS	C57BL/6N;C57BL/6NTac	B6	4	A
IRFS12.1g	Irf7:Hom	Homozygous	Female	2013-02-24	Irf7	2013-04-17	290	7w 3d	IRFS	C57BL/6N;C57BL/6NTac	B6	4	A
IRFS12.1h	Irf7:Hom	Homozygous	Female	2013-02-24	Irf7	2013-04-17	300	7w 3d	IRFS	C57BL/6N;C57BL/6NTac	B6	4	A
RIKA5.2g	Lacc1:Hom	Homozygous	Female	2013-02-20	Lacc1	2013-04-17	240	8w	RIKA	C57BL/6N;C57BL/6NTac	B6	4	A
RIKA5.2h	Lacc1:Hom	Homozygous	Female	2013-02-20	Lacc1	2013-04-17	150	8w	RIKA	C57BL/6N;C57BL/6NTac	B6	4	A
RIKA5.2i	Lacc1:Hom	Homozygous	Female	2013-02-20	Lacc1	2013-04-17	220	8w	RIKA	C57BL/6N;C57BL/6NTac	B6	4	A
RIKA5.2j	Lacc1:Hom	Homozygous	Female	2013-02-20	Lacc1	2013-04-17	110	8w	RIKA	C57BL/6N;C57BL/6NTac	B6	4	A
RIKA6.2e	Lacc1:Hom	Homozygous	Female	2013-02-19	Lacc1	2013-04-17	105	8w 1d	RIKA	C57BL/6N;C57BL/6NTac	B6	4	A
RIKA6.2f	Lacc1:Hom	Homozygous	Female	2013-02-19	Lacc1	2013-04-17	152	8w 1d	RIKA	C57BL/6N;C57BL/6NTac	B6	4	A
MCRQ97.1f	Ocm:Hom	Homozygous	Female	2013-02-24	Ocm	2013-04-17	250	7w 3d	OCMZ	C57BL/6N;C57BL/6NTac	B6	4	A
MCRQ97.1g	Ocm:Hom	Homozygous	Female	2013-02-24	Ocm	2013-04-17	270	7w 3d	OCMZ	C57BL/6N;C57BL/6NTac	B6	4	A
[truncated: 21,977 more rows]
